# Supplementary material
Source: publisher figshare collection journal article supplement (https://tandf.figshare.com/ndownloader/files/23209289)

A concise synthesis of 2-benzoyl-1-indanones and 1-Indanones from 2-aryl-1-Tetralones

Anusueya Kumari, Saurabh Kumar Singh, Raj Bahadur Singh, Sabyasachi Bhunia, Partha Ghosh*

*Department of Chemistry, Central University of Jharkhand,*

*Brambe, Ranchi 835205, Jharkhand, India*

*partha.ghosh@cuj.ac.in*

**Supporting Information**

Experimental Procedures: S-2

Copies of 1H and 13C spectra of new compounds: S-5

**Corresponding author:**

Dr.Partha Ghosh

Assistant Professor

Department of Chemistry

Central University of Jharkhand

Brambe, Ranchi 835205

Jharkhand, India

EXPERIMENTAL PROCEDURES

General information: Starting materials, reagents and solvents (dry) were purchased from commercial suppliers and used without further purifications. All reactions were conducted in oven-dried (100 °C) glassware. Reactions progress was monitored by silica gel thin-layer chromatography (tlc) plates (with fluorescent indicator), visualized under UV. Products were purified by flash column chromatography (FCC) on 100-200 mesh silica gels. 1H NMR and 13C NMR were recorded in Bruker Avance 300 (FT NMR) at 300 MHz and 75 MHz respectively, using tetramethylsilane as an internal reference. High-resolution mass spectra (HRMS) were measured on an Agilent quadrupole time-of-flight (Q-TOF) mass spectrometer instrument with an electrospray ionization (ESI) source.

General procedure for the synthesis of Methyl-2-(3-oxo-3-aryl) benzoates **5f-h**: To a solution of 2-aryl-1-tetralones (3.0 mmol) in toluene (60 ml) in a two neck round bottom flask was added MeOH (1.2 ml) and TsOH.H2O (170 mg, 0.9 mmol). The reaction flask was then fitted with the condenser in one neck and air balloon on another neck. The reaction mixture was then heated at 70 oC and monitored by TLC. Upon completion of the reaction, the reaction was cooled to room temperature and to that sodium acetate (100 mg, 1.21 mmol) was added and stirred for 10 minutes. The reaction mixture was then diluted with ethyl acetate (100 mL) and washed with water (20 ml) and then brine (20 ml). Evaporation of solvent followed by column chromatography (Silica gel with ethyl acetate/hexane as eluent) gave the desired Methyl-2-(3-oxo-3-aryl) benzoates.

*5-Methoxy-2-(3-oxo-3-phenyl-propyl)-benzoic acid methyl ester* **5f**.Yield 750 mg (82%); light yellow oil;*Rf* = 0.40 (10% EtOAc/hexane); 1H NMR (300 MHz, CDCl3) δ 8.01-7.92 (2H, m), 7.58-7.40 (4H, m), 7.26 (1H, dd, *J* = 6.3 Hz, 6.3 Hz), 6.99 (1H, dd, *J* = 8.4 Hz, 2.7 Hz), 3.88 (3H, s), 3.83 (3H, s), 3.30 (4H, s); 13C NMR (75 MHz, CDCl3) δ 199.8, 167.8, 158.0, 137.2, 135.5, 133.1, 132.7, 130.4, 128.7, 128.3, 118.7, 115.6, 55.7, 52.3, 40.9, 28.8; HRMS (ESI) *m/z* calcd for C18H19O4 ([M+H]+), 299.1283, found 299.1282.

*5-Methoxy-2-(3-oxo-3-p-tolyl-propyl)-benzoic acid methyl ester* **5g**. Yield 805 mg (86%); light yellow oil;*Rf* = 0.40 (10% EtOAc/hexane); 1H NMR (300 MHz, CDCl3) δ 7.87 (2H, d, *J* = 8.4 Hz), 7.43 (1H, d, *J* = 3.0 Hz), 7.25 (1H, d, *J* = 8.4 Hz), 7.23 (2H, d, *J* = 7.2 Hz), 6.99 (1H, dd, *J* = 78.4 Hz, 3.0 Hz), 3.88 (3H, s), 3.81 (3H, s), 3.28 (4H, s), 2.38 (3H, s); 13C NMR (75 MHz, CDCl3) δ 199.4, 167.8, 157.9, 143.8, 135.5, 134.7, 132.7, 130. 3, 129.4, 128.4, 118.7, 115.5, 55.6, 52.2, 40.8, 28.8, 21.8; HRMS (ESI) *m/z* calcd for C19H21O4 ([M+H]+), 313.1440, found 313.1439.

*5-Fluoro-2-(3-oxo-3-phenyl-propyl)-benzoic acid methyl ester* **5h**. Yield 702 mg (82%); light yellow oil;*Rf* = 0.50 (10% EtOAc/hexane); 1H NMR (400 MHz, CDCl3) δ 8.00-7.94 (2H, m), 7.61 (1H, dd, , *J* = 9.3 Hz, 3.0 Hz), 7.60-7.30 (4H, m), 7.14 (1H, dd, , *J* = 8. 1 Hz, 3.0 Hz), 3.89 (3H, s), 3.36-3.30 (2H, m); δ 199.5, 166.9, 161.0 (d, *J* = 245 Hz), 139.4 (d, *J* = 3.0 Hz), 137.1, 133.4 (d, *J* = 7.5 Hz), 133.2, 131.0 (d, *J* = 6.8 Hz), 128.8, 128.3, 119.5 (d, *J* = 21.0 Hz), 117.7 (d, *J* = 23.0 Hz), 52.5, 40.7, 28.8; HRMS (ESI) *m/z* calcd for C17H16FO3 ([M+H]+), 287.1083, found 287.1082.

Compounds **6a, 6c, 6d, 8, 9** are known.1

*2-(Hydroxy-p-tolyl-methylene)-indan-1-one* **6a**.Yield 233 mg (93%); light yellow solid; *Rf* = 0.40 (10% EtOAc/hexane); mp. 98 °C; 1H NMR (300 MHz, CDCl3) δ 1H NMR (300 MHz, CDCl3) δ 15. 14 (1H, br), 7.81 (1H, d, *J* = 7.2 Hz), 7.79 (2H, d, *J* = 8.4 Hz), 7.55-7.30 (3H, m), 7. 24 (2H, d, *J* = 7.8 Hz), 3.79 (2H, s), 2.37 (3H, s); 13C NMR (75 MHz, CDCl3) δ 195.6, 171.1, 148.5, 142.0, 138.0, 133.2, 132.0, 130.0, 128.2, 127.4, 125.6, 123.3, 109.1, 32.4, 21.6.

*2-(Hydroxy-o-tolyl-methylene)-indan-1-one* **6b**.Yield 225 mg (90%); white solid;*Rf* = 0.40 (10% EtOAc/hexane); mp. 90 °C; 1H NMR (300 MHz, CDCl3) δ 1H NMR (300 MHz, CDCl3) δ 15. 14 (1H, br), 7.88 (1H, d, *J* = 7.2 Hz), 7.85 (2H, d, *J* = 8.4 Hz), 7.60-7.8 (3H, m), 7. 30 (2H, d, *J* = 8.1 Hz), 3.92 (2H, s), 2.43 (3H, s); 13C NMR (75 MHz, CDCl3) δ 195.7, 171.4, 148.6, 142.1, 138.2, 133.3, 132.2, 129.5, 128.4, 127.6, 125.7, 123.5, 109.2, 32.6, 21.8; HRMS (ESI) *m/z* calcd for C17H15O2 ([M+H]+), 251.1072, found 251.1070.

*2-[Hydroxy-(4-methoxy-phenyl)-methylene]-indan-1-one* **6c**. Yield 245 mg (92%); light yellow solid;*Rf* = 0.40 (10% EtOAc/hexane); mp. 110 °C; 1H NMR (300 MHz, CDCl3) δ 1H NMR (300 MHz, CDCl3) δ 15. 31 (1H, br), 7.95 (2H, d, *J* = 9.0 Hz), 7.87 (1H, d, *J* = 7.5 Hz), 7.65-7. 35 (3H, m), 7.00 (2H, d, *J* = 9.0 Hz), 3.92 (2H, s), 3.88 (3H, s); 13C NMR (75 MHz, CDCl3) δ 195.2, 171.5, 162.4, 148.4, 138.3, 133.2, 132.5, 130.3, 127.6, 125.7, 123.5, 114.2, 108.7, 55.7, 32.8.

*2-[(4-Chloro-phenyl)-hydroxy-methylene]-indan-1-one* **6d**. Yield 260 mg (96%); light yellow solid;*Rf* = 0.40 (10% EtOAc/hexane); mp. 162 °C; 1H NMR (300 MHz, CDCl3) δ 1H NMR (300 MHz, CDCl3) δ 15.04 (1H,br), 7.89 (2H, d, *J* = 8.7 Hz), 7.88 (1H, d, *J* = 6.9 Hz), 7.65-7.40 (5H, m), 3.91 (2H, s); 13C NMR (75 MHz, CDCl3) δ 195.8, 169.4, 148.4, 137.7, 133.5, 133.2, 131.3, 129.4, 128.9, 127.5, 125.6, 123.5, 109.5, 32.2.

*2-(Hydroxy-pyridin-3-yl-methylene)-indan-1-one* **6e**.Yield 218 mg (92%); low melting solid; *Rf* = 0.40 (10% EtOAc/hexane); 1H NMR (300 MHz, CDCl3) δ 1H NMR (300 MHz, CDCl3) δ 14. 90 (1H, br), 9.17 (1H, d, *J* = 2.1 Hz), 8.74 (1H, dd, *J* = 4.8 Hz, 1.5 Hz), 8.25 (1H, dt, *J* = 8.1 Hz, 2.1 Hz), 7.91 (1H, d, *J* = 7.8 Hz), 7.70-7. 40 (4H, m), 3.96 (2H, s); 13C NMR (75 MHz, CDCl3) δ 196.3, 168.0, 151.8, 149.3, 148.7, 137.8, 135.6, 134.0, 131.1, 127.9, 125.9, 123.9, 123.8, 110.4, 32.1; HRMS (ESI) *m/z* calcd for C15H12NO2 ([M+H]+), 238.0868, found 238.0865.

*2-(Hydroxy-phenyl-methylene)-6-methoxy-indan-1-one* **6f**. Yield 247 mg (93%); white solid;*Rf* = 0.40 (10% EtOAc/hexane); mp. 128 °C; 1H NMR (300 MHz, CDCl3) δ 1H NMR (300 MHz, CDCl3) δ 14. 99 (1H, br), 7.98-7. 90 (2H, m), 7.55-7.47 (3H, m), 7.41 (1H, d, *J* = 8.4 Hz), 7. 35 (1H, d, *J* = 2.4 Hz), 7.17 (1H, dd, *J* = 8.4 Hz, 2.7 Hz), 3.88 (3H, s), 3.87 (2H, s); 13C NMR (75 MHz, CDCl3) δ 196.1, 170.5, 159.8, 141.6, 139.4, 135.0, 131.4, 128.8, 128.3, 126.6, 122.7, 110.6, 105.5, 55.9, 31.7; HRMS (ESI) *m/z* calcd for C17H15O3 ([M+H]+), 267.1021, found 267.1022.

*2-(Hydroxy-p-tolyl-methylene)-6-methoxy-indan-1-one* **6g**. Yield 260 mg (94%); white solid;*Rf* = 0.40 (10% EtOAc/hexane); mp. 122 °C; 1H NMR (300 MHz, CDCl3) δ 1H NMR (300 MHz, CDCl3) δ 15. 08 (1H, br), 7.84 (2H, d, *J* = 8.4 Hz), 7.45-7. 25 (4H, m), 7.15 (1H, dd, *J* = 8.4 Hz, 2.4 Hz), 3.87 (3H, s), 3.84 (2H, s), 2.43 (3H, s); 13C NMR (75 MHz, CDCl3) δ 195.8, 170.8, 159.7, 142.1, 141.4, 132.2, 130.1, 129.5, 128.4, 126.5, 122.5, 110.2, 105.4, 55.9, 31.9, 21.8; HRMS (ESI) *m/z* calcd for C18H17O3 ([M+H]+), 281.1178, found 281.1177.

*6-Fluoro-2-(hydroxy-phenyl-methylene)-indan-1-one* **6h**. Yield 238 mg (94%); low melting solid;*Rf* = 0.40 (10% EtOAc/hexane); 1H NMR (300 MHz, CDCl3) δ 1H NMR (300 MHz, CDCl3) δ 14. 95 (1H, br), 7.87-7. 95 (2H, m), 7.55-7.44 (5H, m), 7.32-7.22 (1H, m), 3.89 (2H, s); 13C NMR (75 MHz, CDCl3) δ 194.4 (d, *J* = 3.0 Hz), 172.0, 162.6 (d, *J* = 246.0 Hz), 143.9 (d, *J* = 2.3 Hz), 139.8 (d, *J* = 8.2 Hz), 134.7, 131.7, 128.8, 128.3, 127.1 (d, *J* = 8.2 Hz), 120.9 (d, *J* = 23.2 Hz), 110.4, 109.6 (d, *J* = 23.0 Hz), 31.9; HRMS (ESI) *m/z* calcd for C16H12FO2 ([M+H]+), 255.0821, found 255.0818.

*6-Methoxy-1-indanone* **8**.1H NMR (300 MHz, CDCl3) δ δ 7.39-7.31 (1H, m), 7.20 (1H, s), 7.19 (1H, dd, *J* = 7.5 Hz, 2. 1 Hz), 3.84 (3H, s), 3.07 (2H, dd, *J* = 5.7 Hz, 5.7 Hz), 2.68-2.75 (2H, m).

*6-Fluoro-1-indanone* **9**. 1H NMR (300 MHz, CDCl3) δ 7.48-7.37 (2H, m), 7. 30 (1H,ddd, *J* = 8.7 Hz, 8.7 Hz, 2.7 Hz), 3. 12 (2H, dd, *J* = 5.7 Hz, 5.7 Hz), 2.72-2.79 (2H, m).

Reference: 1. Gonzalez ML, Sánchez-Vergara ME, Álvarez-Bada JR, Chávez-Uribe MI, Toscano RA, Álvarez-Toledano C. *J. Mater. Chem.* C. **2014**; *2*: 5607–5614. DOI:10.1039/c4tc00599f


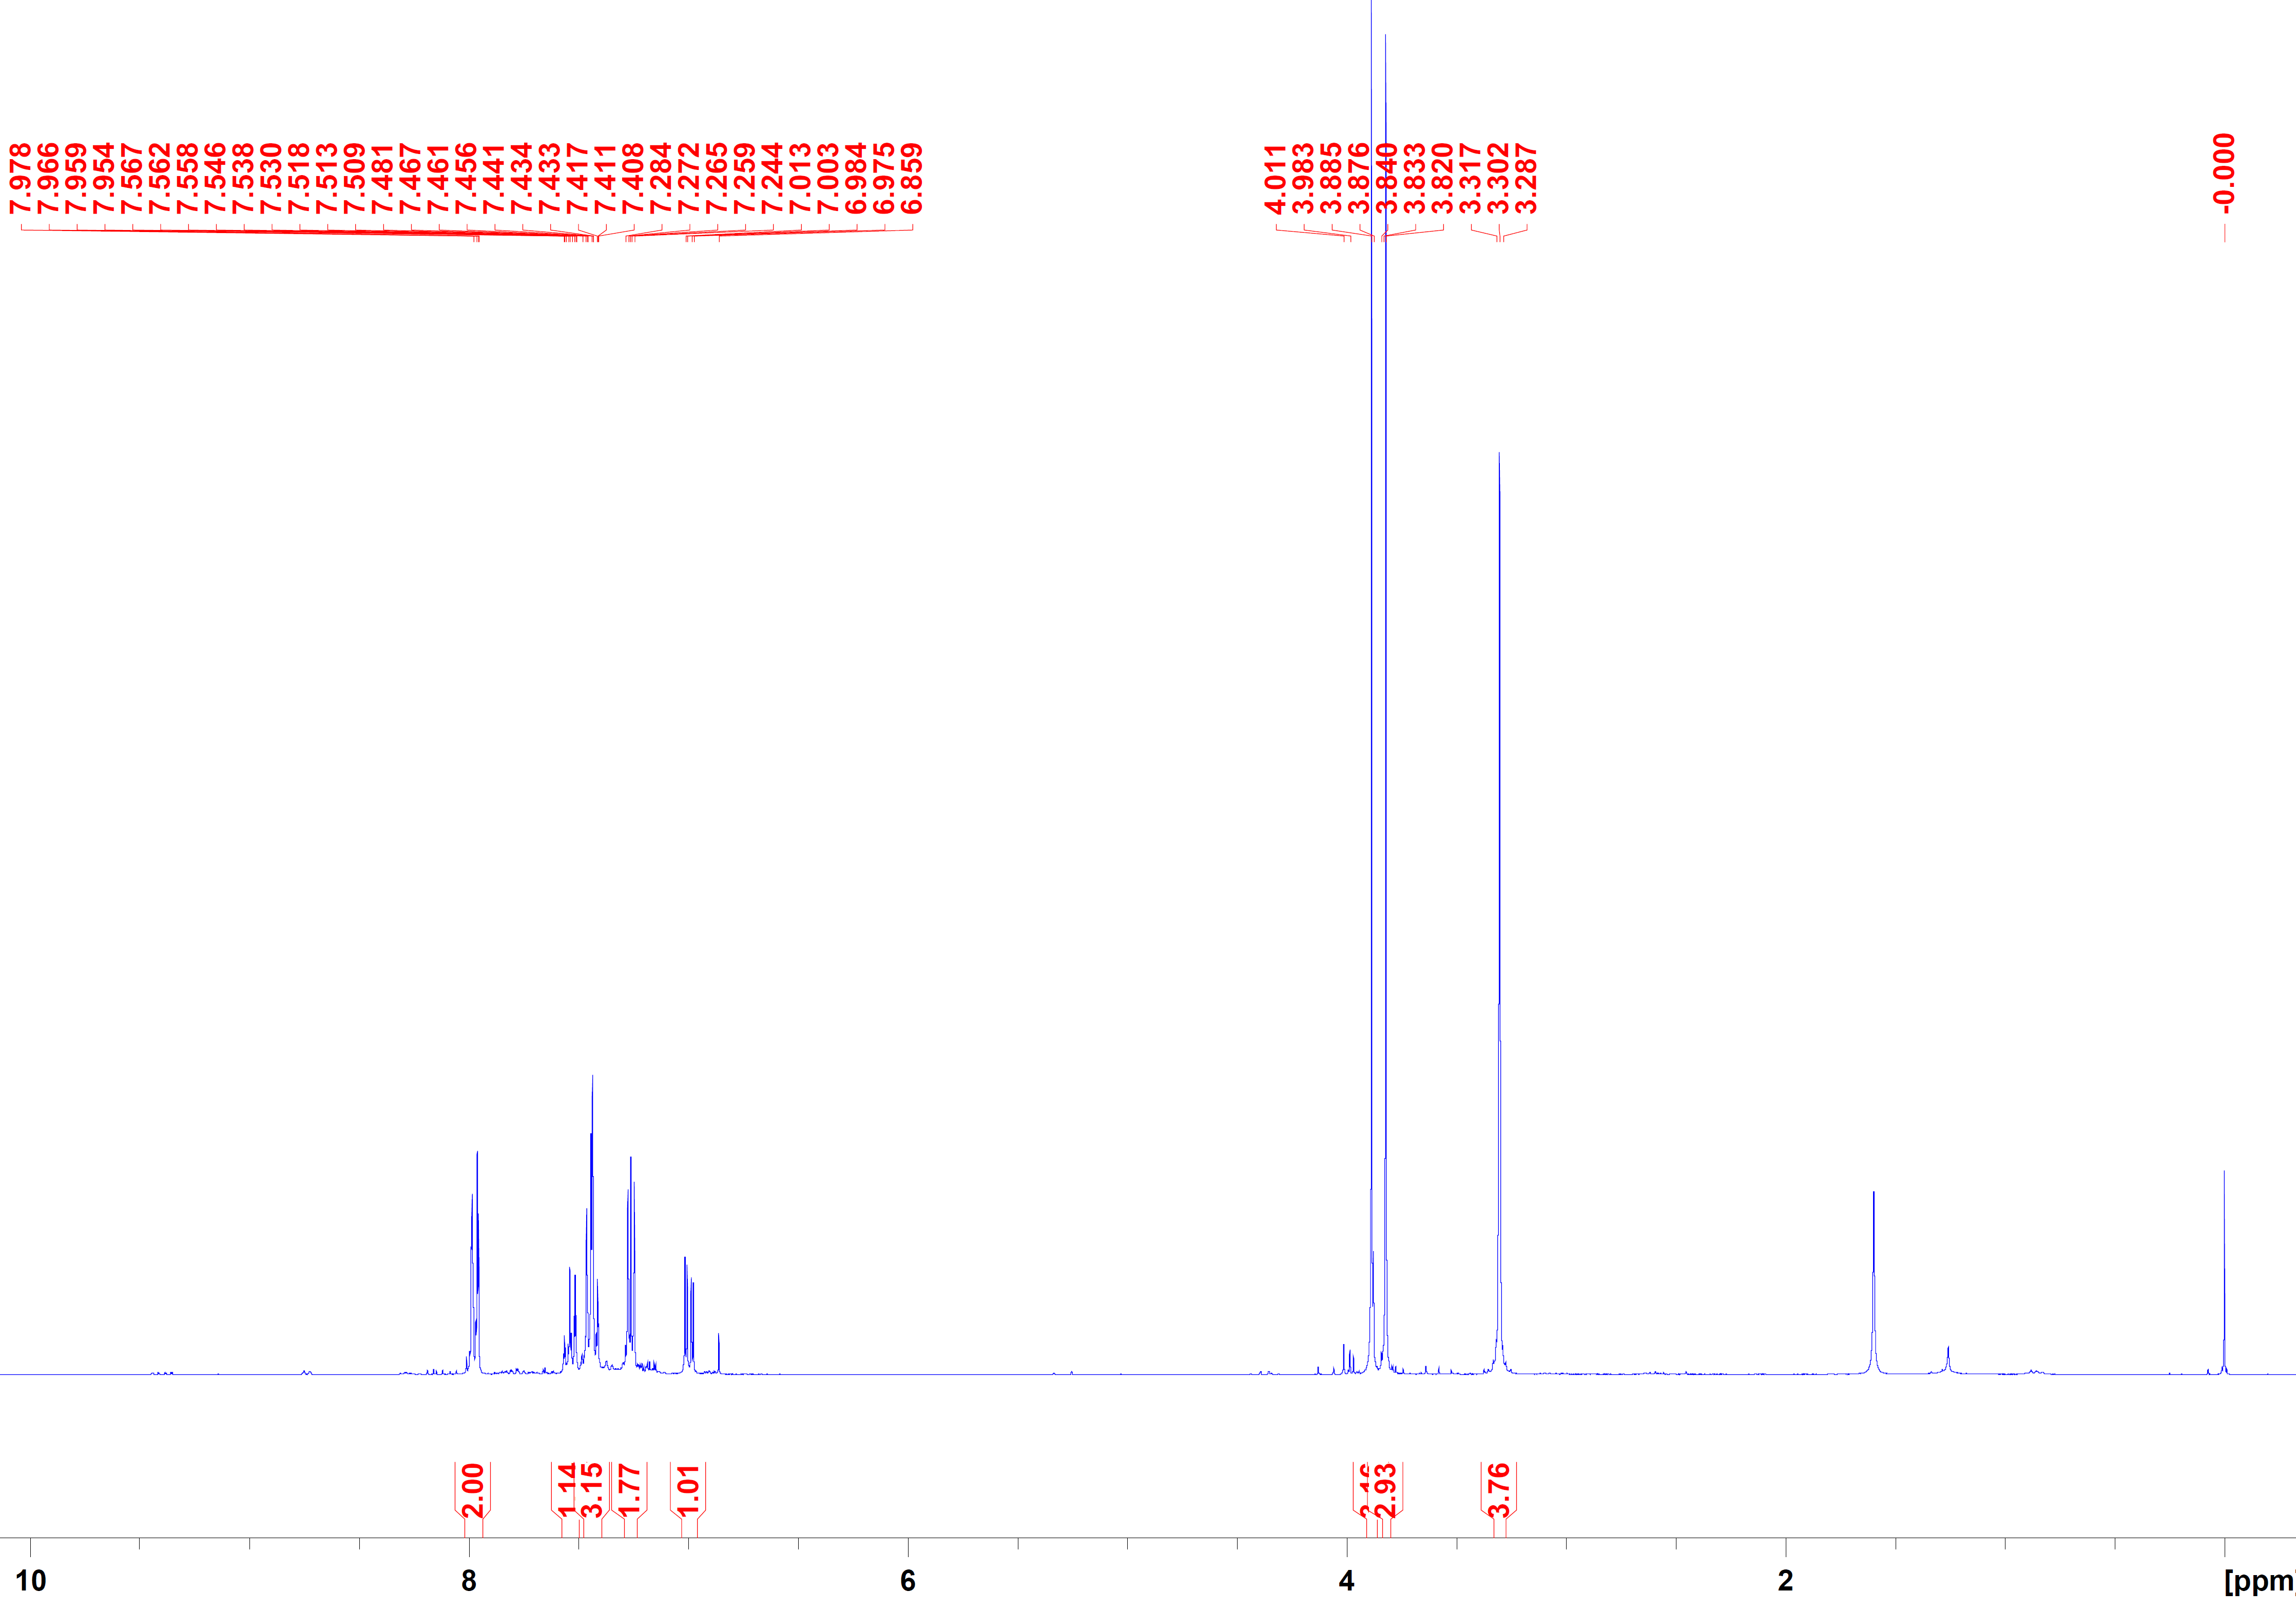


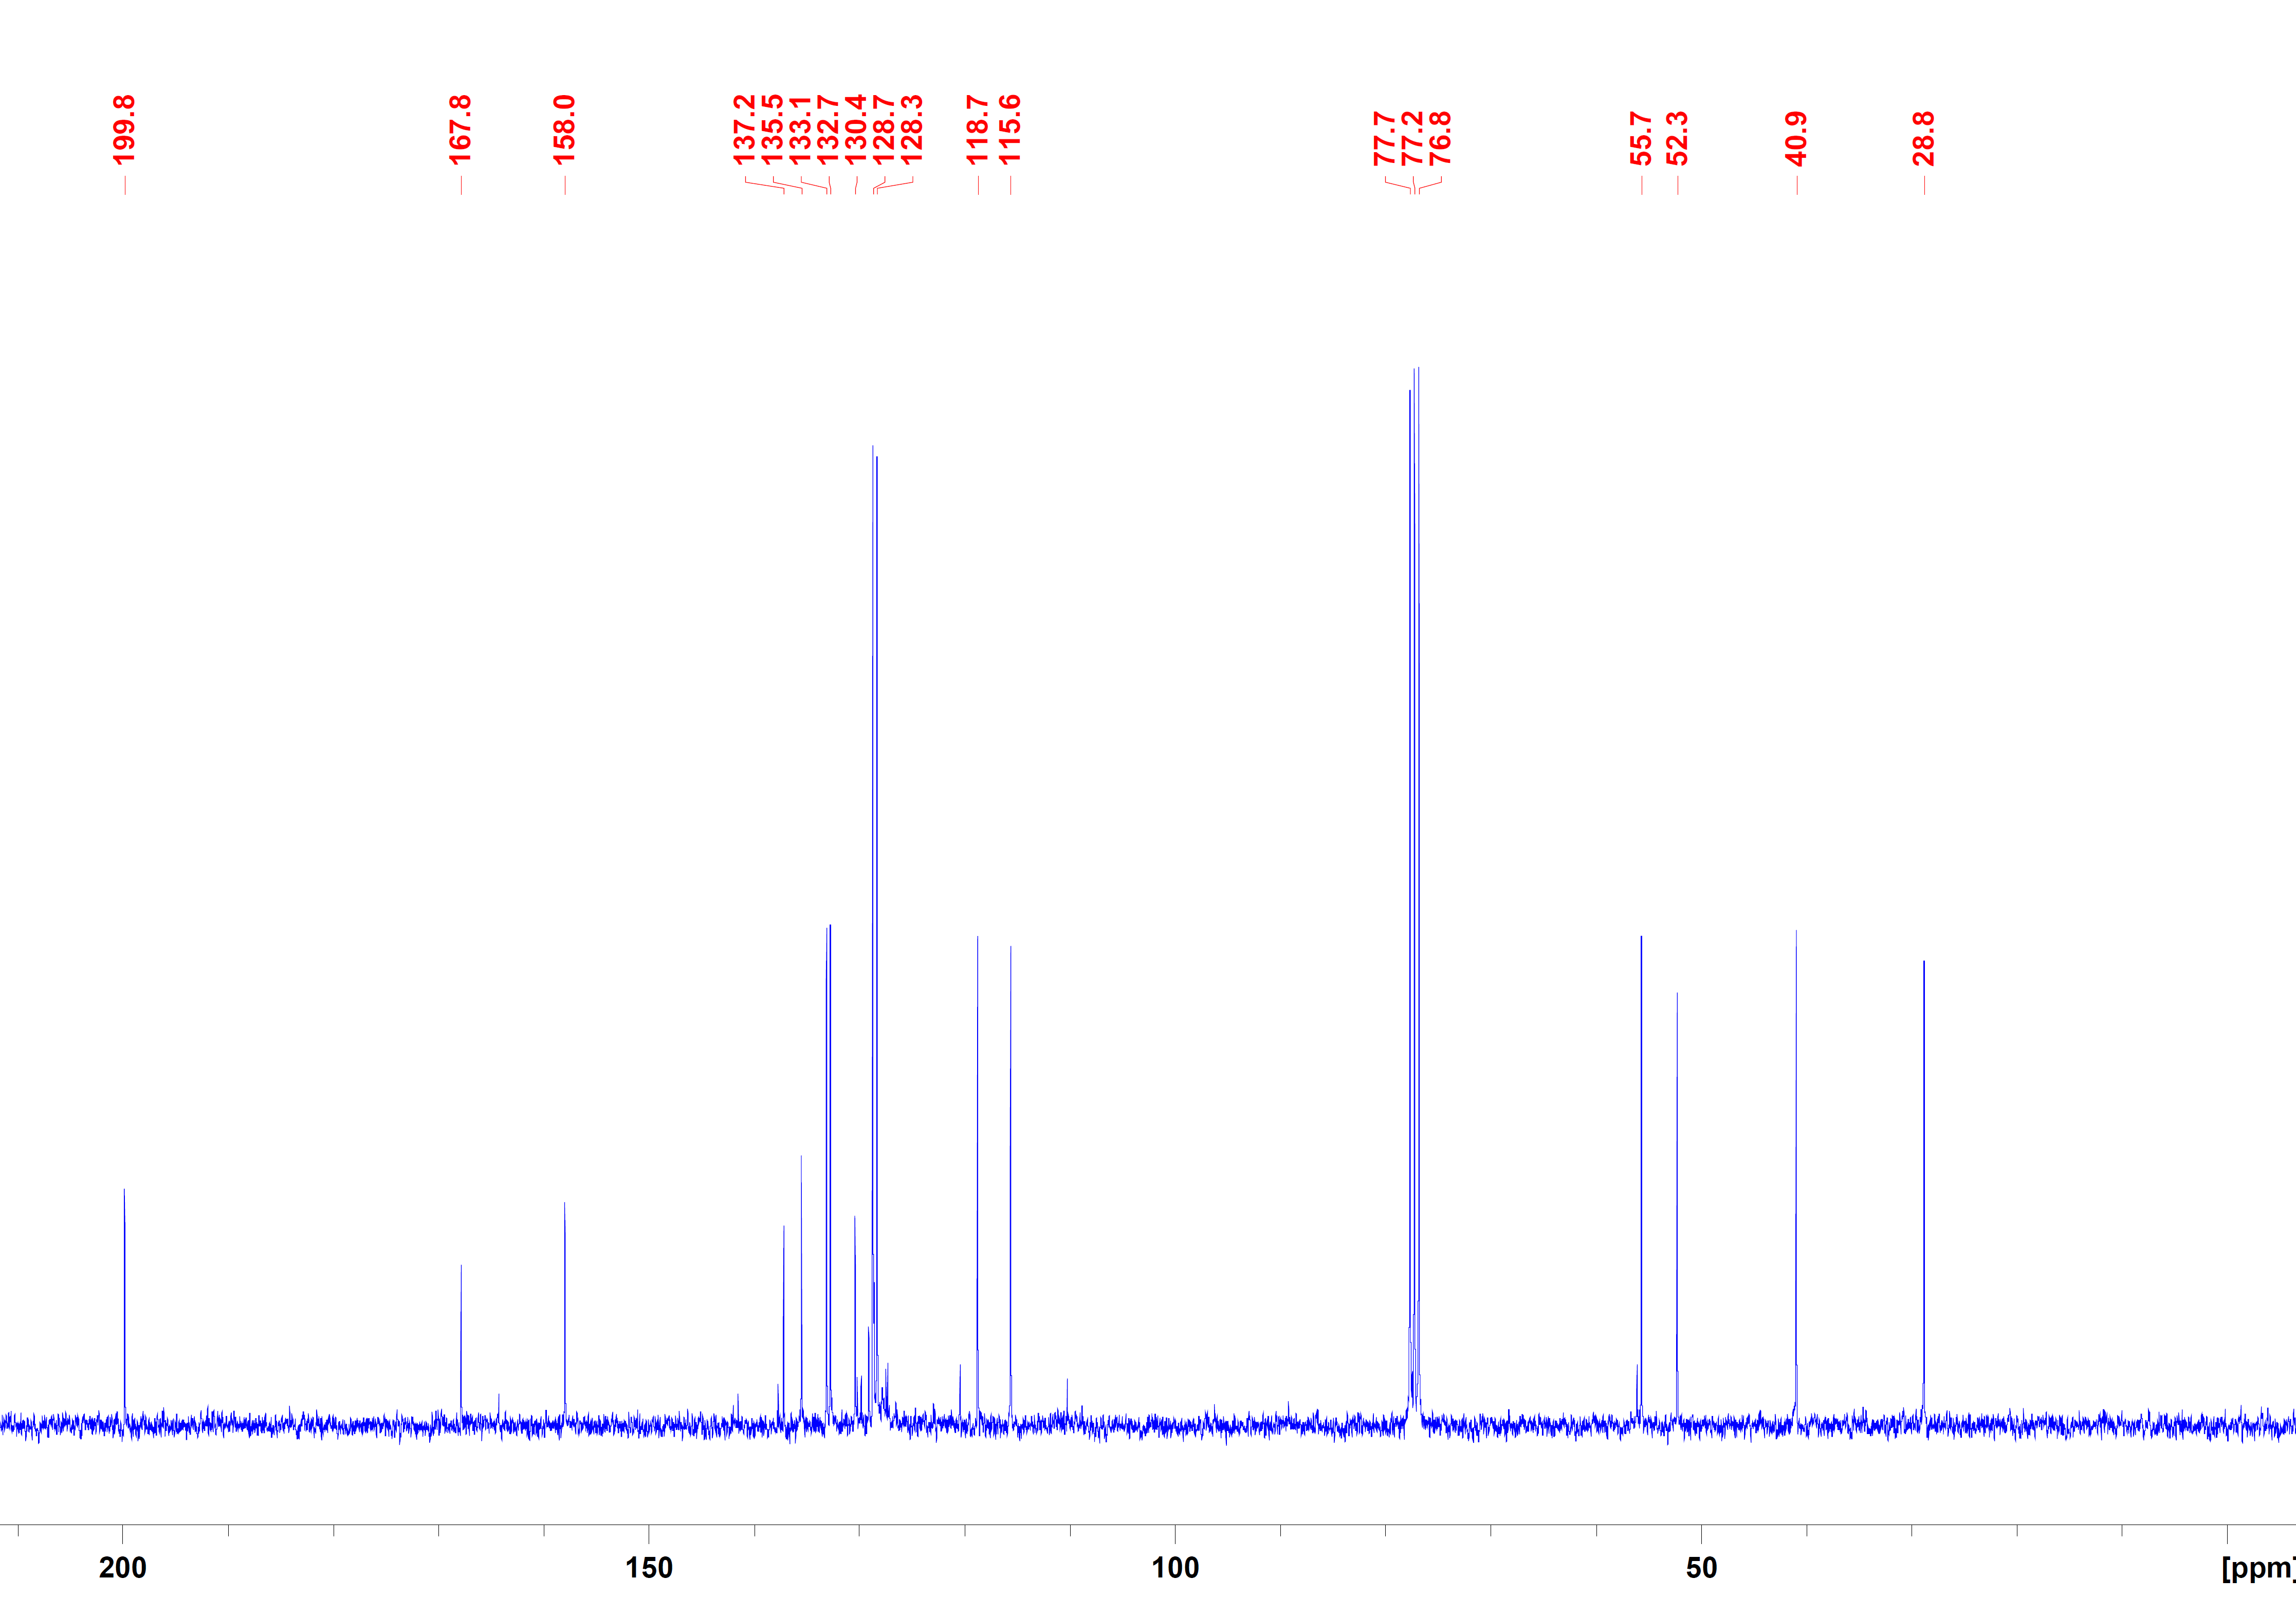


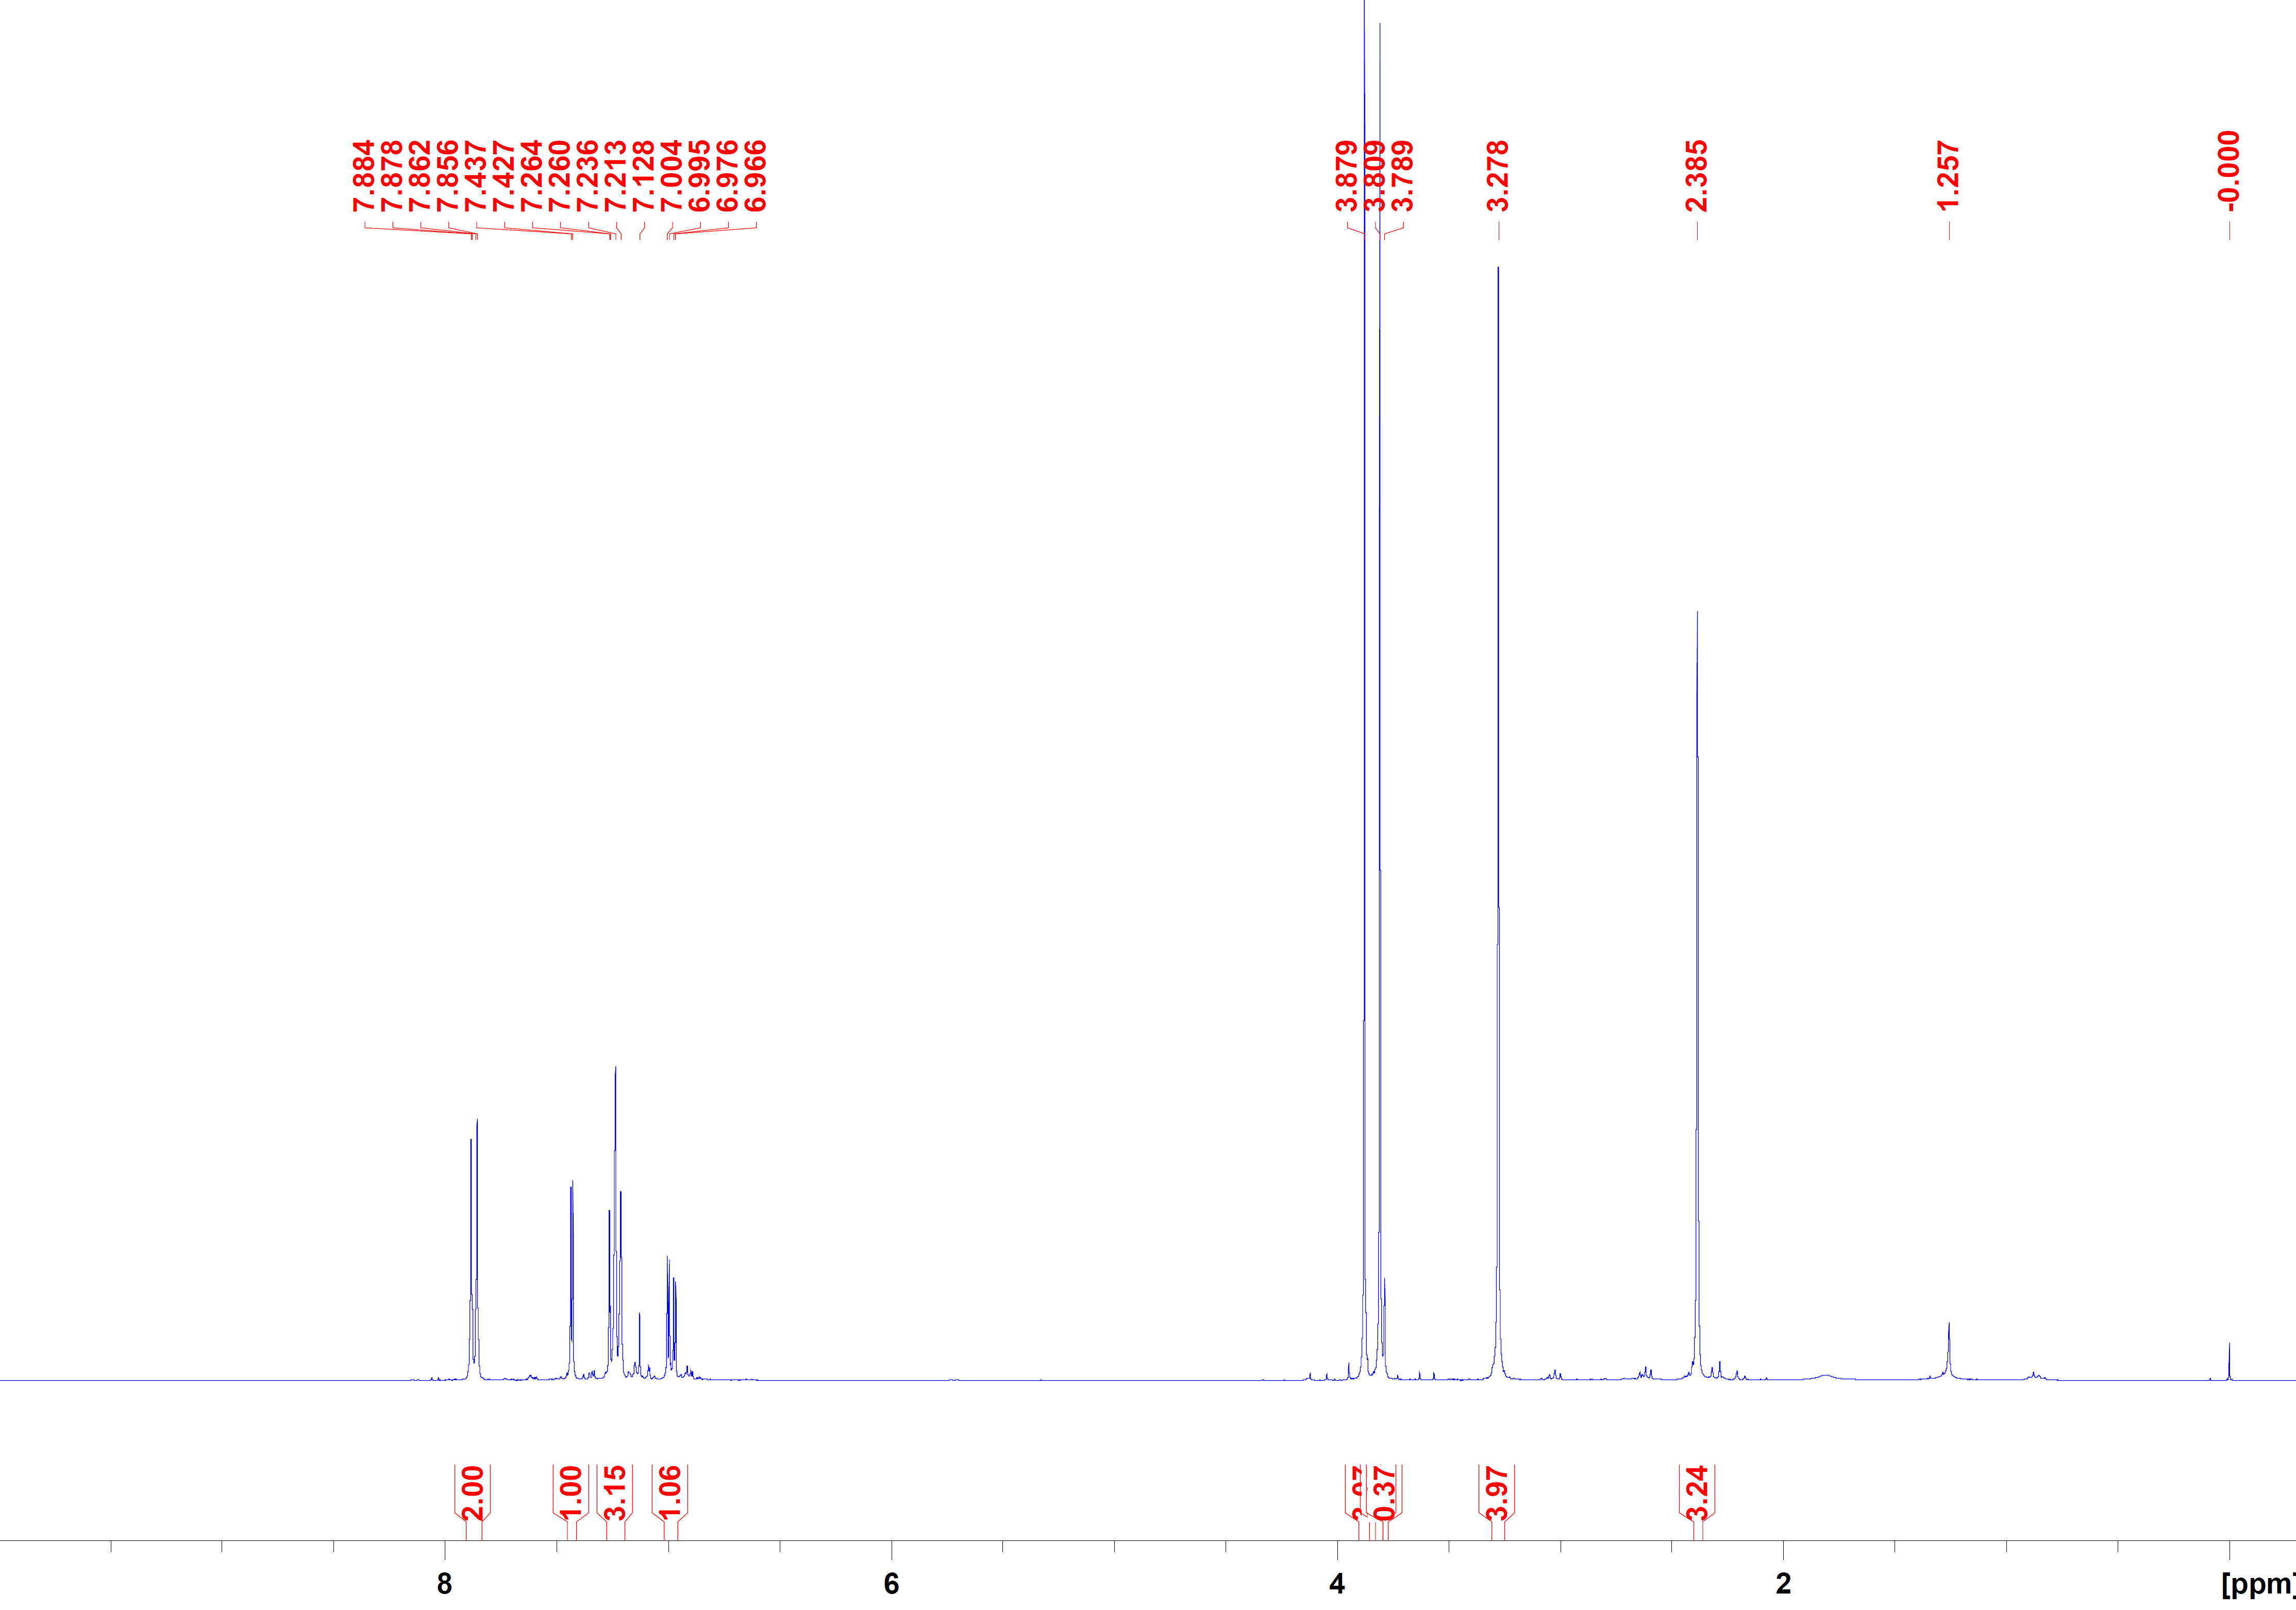


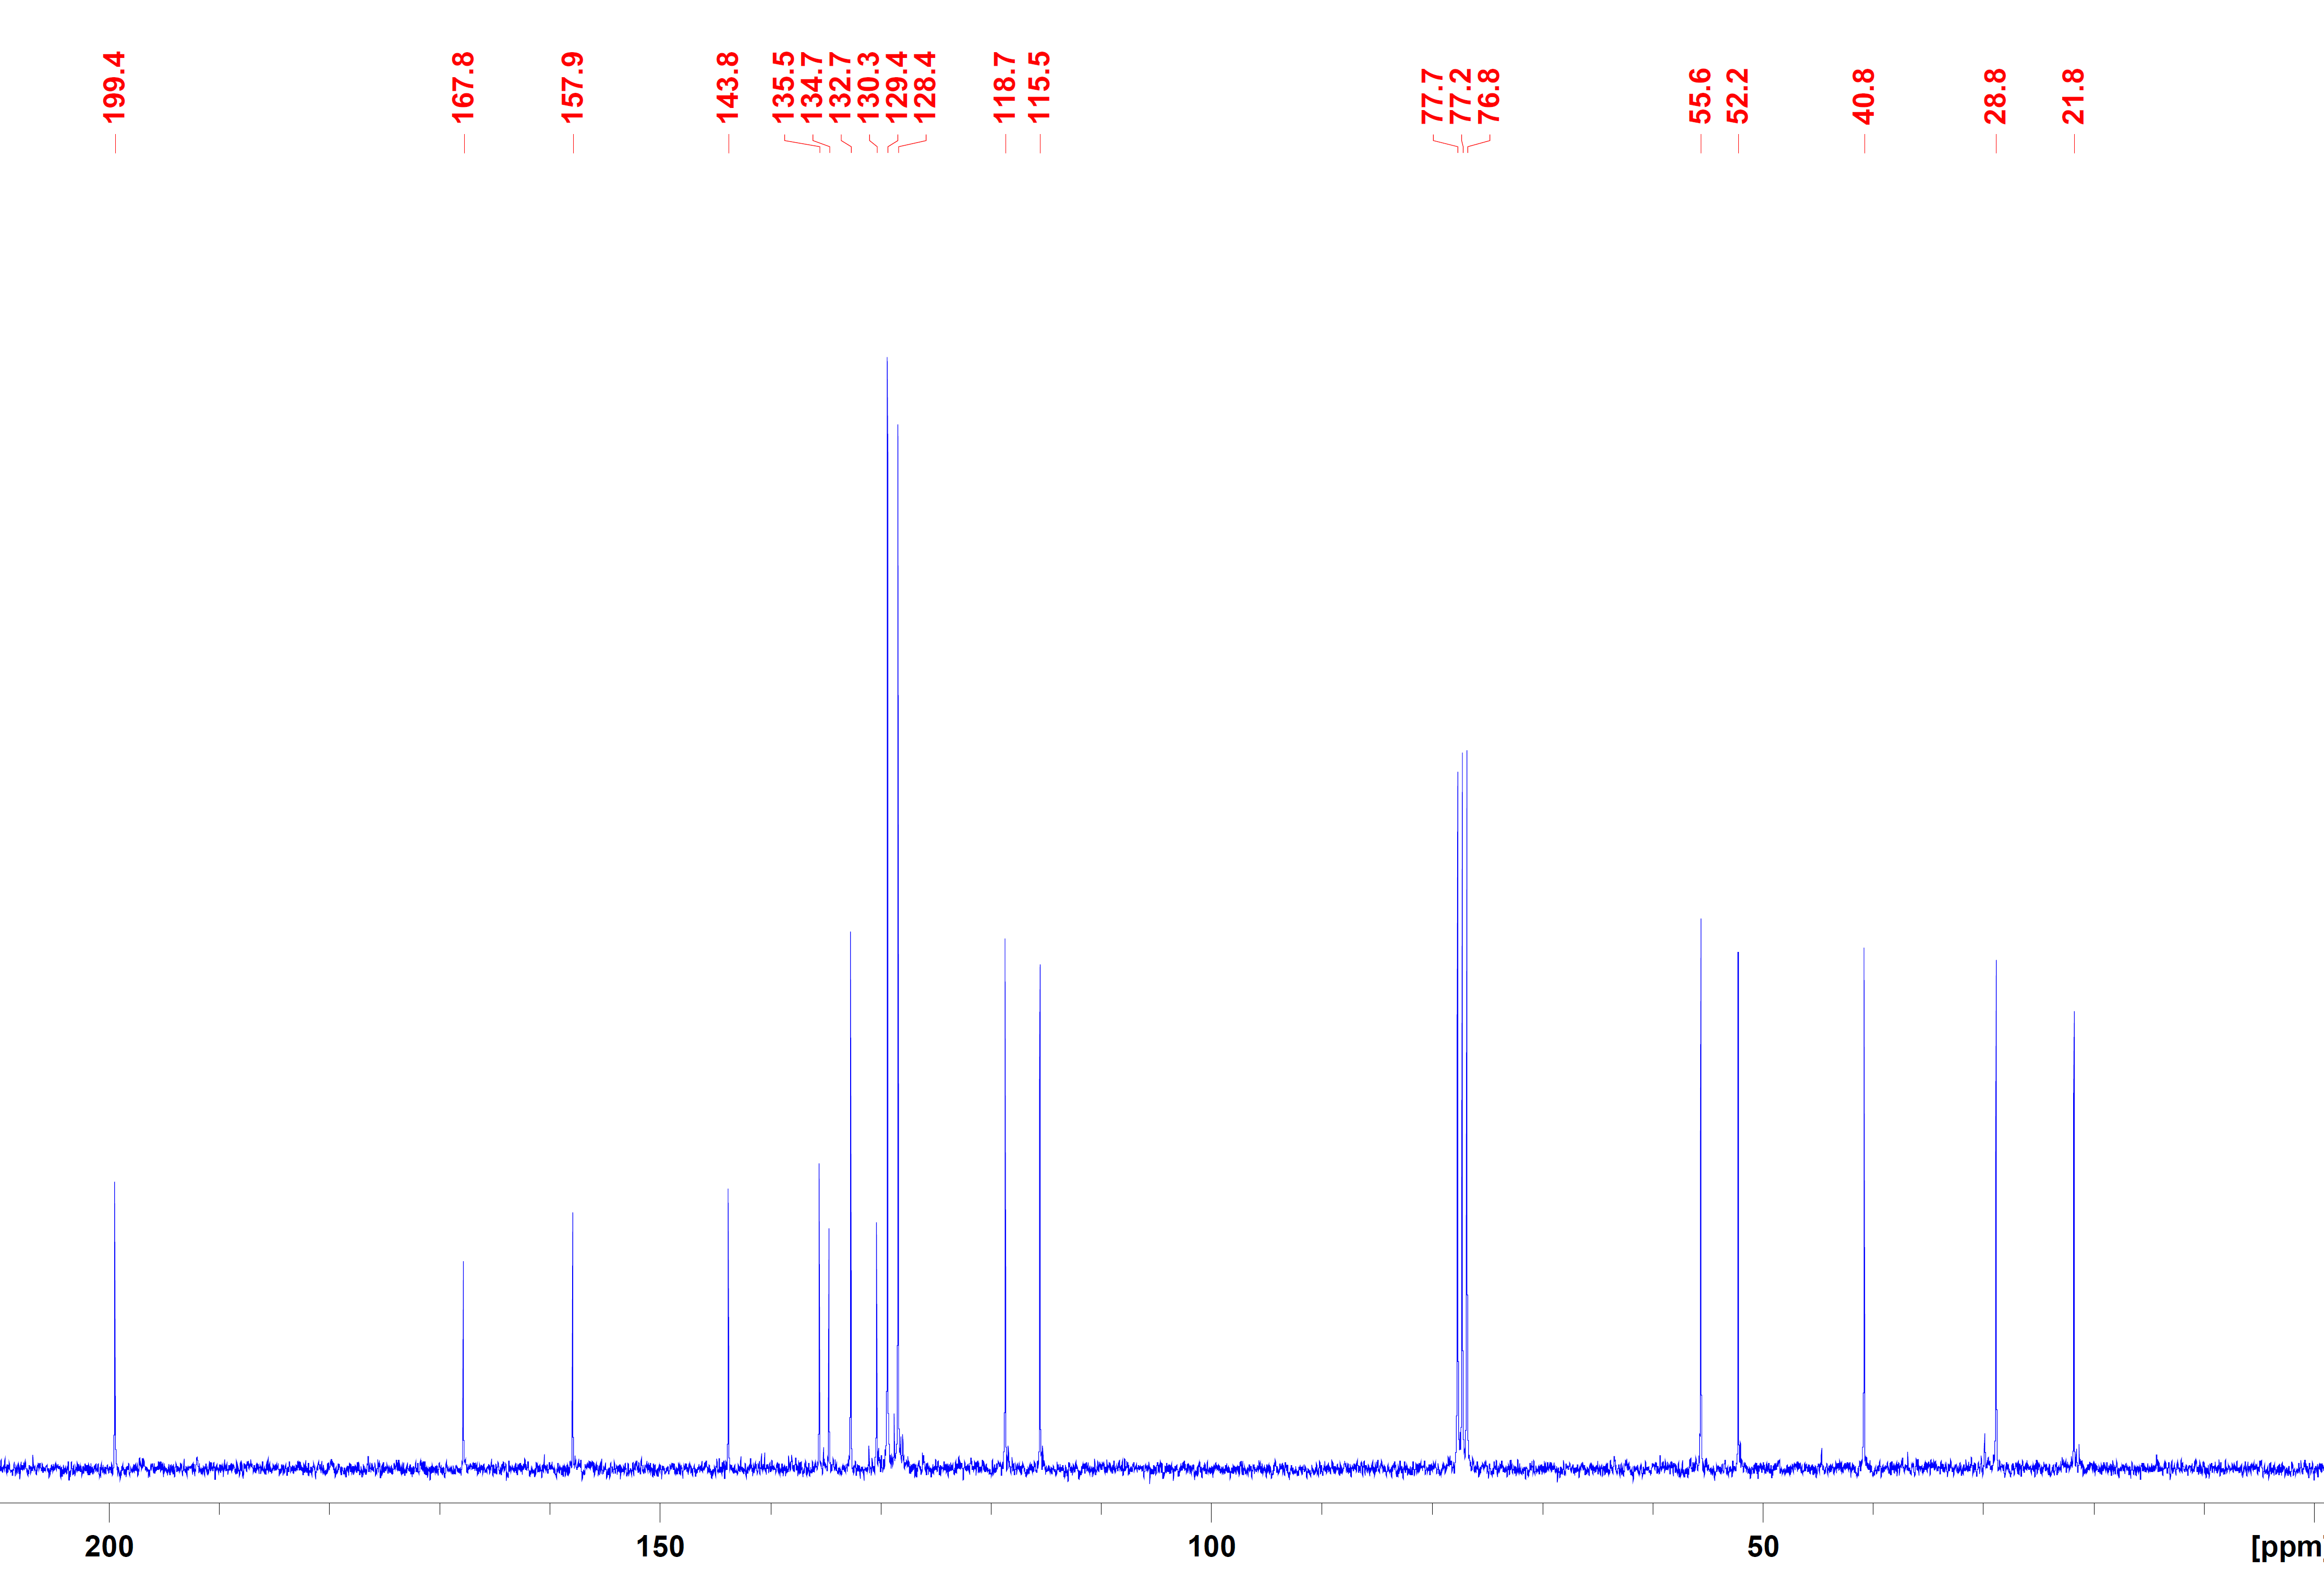


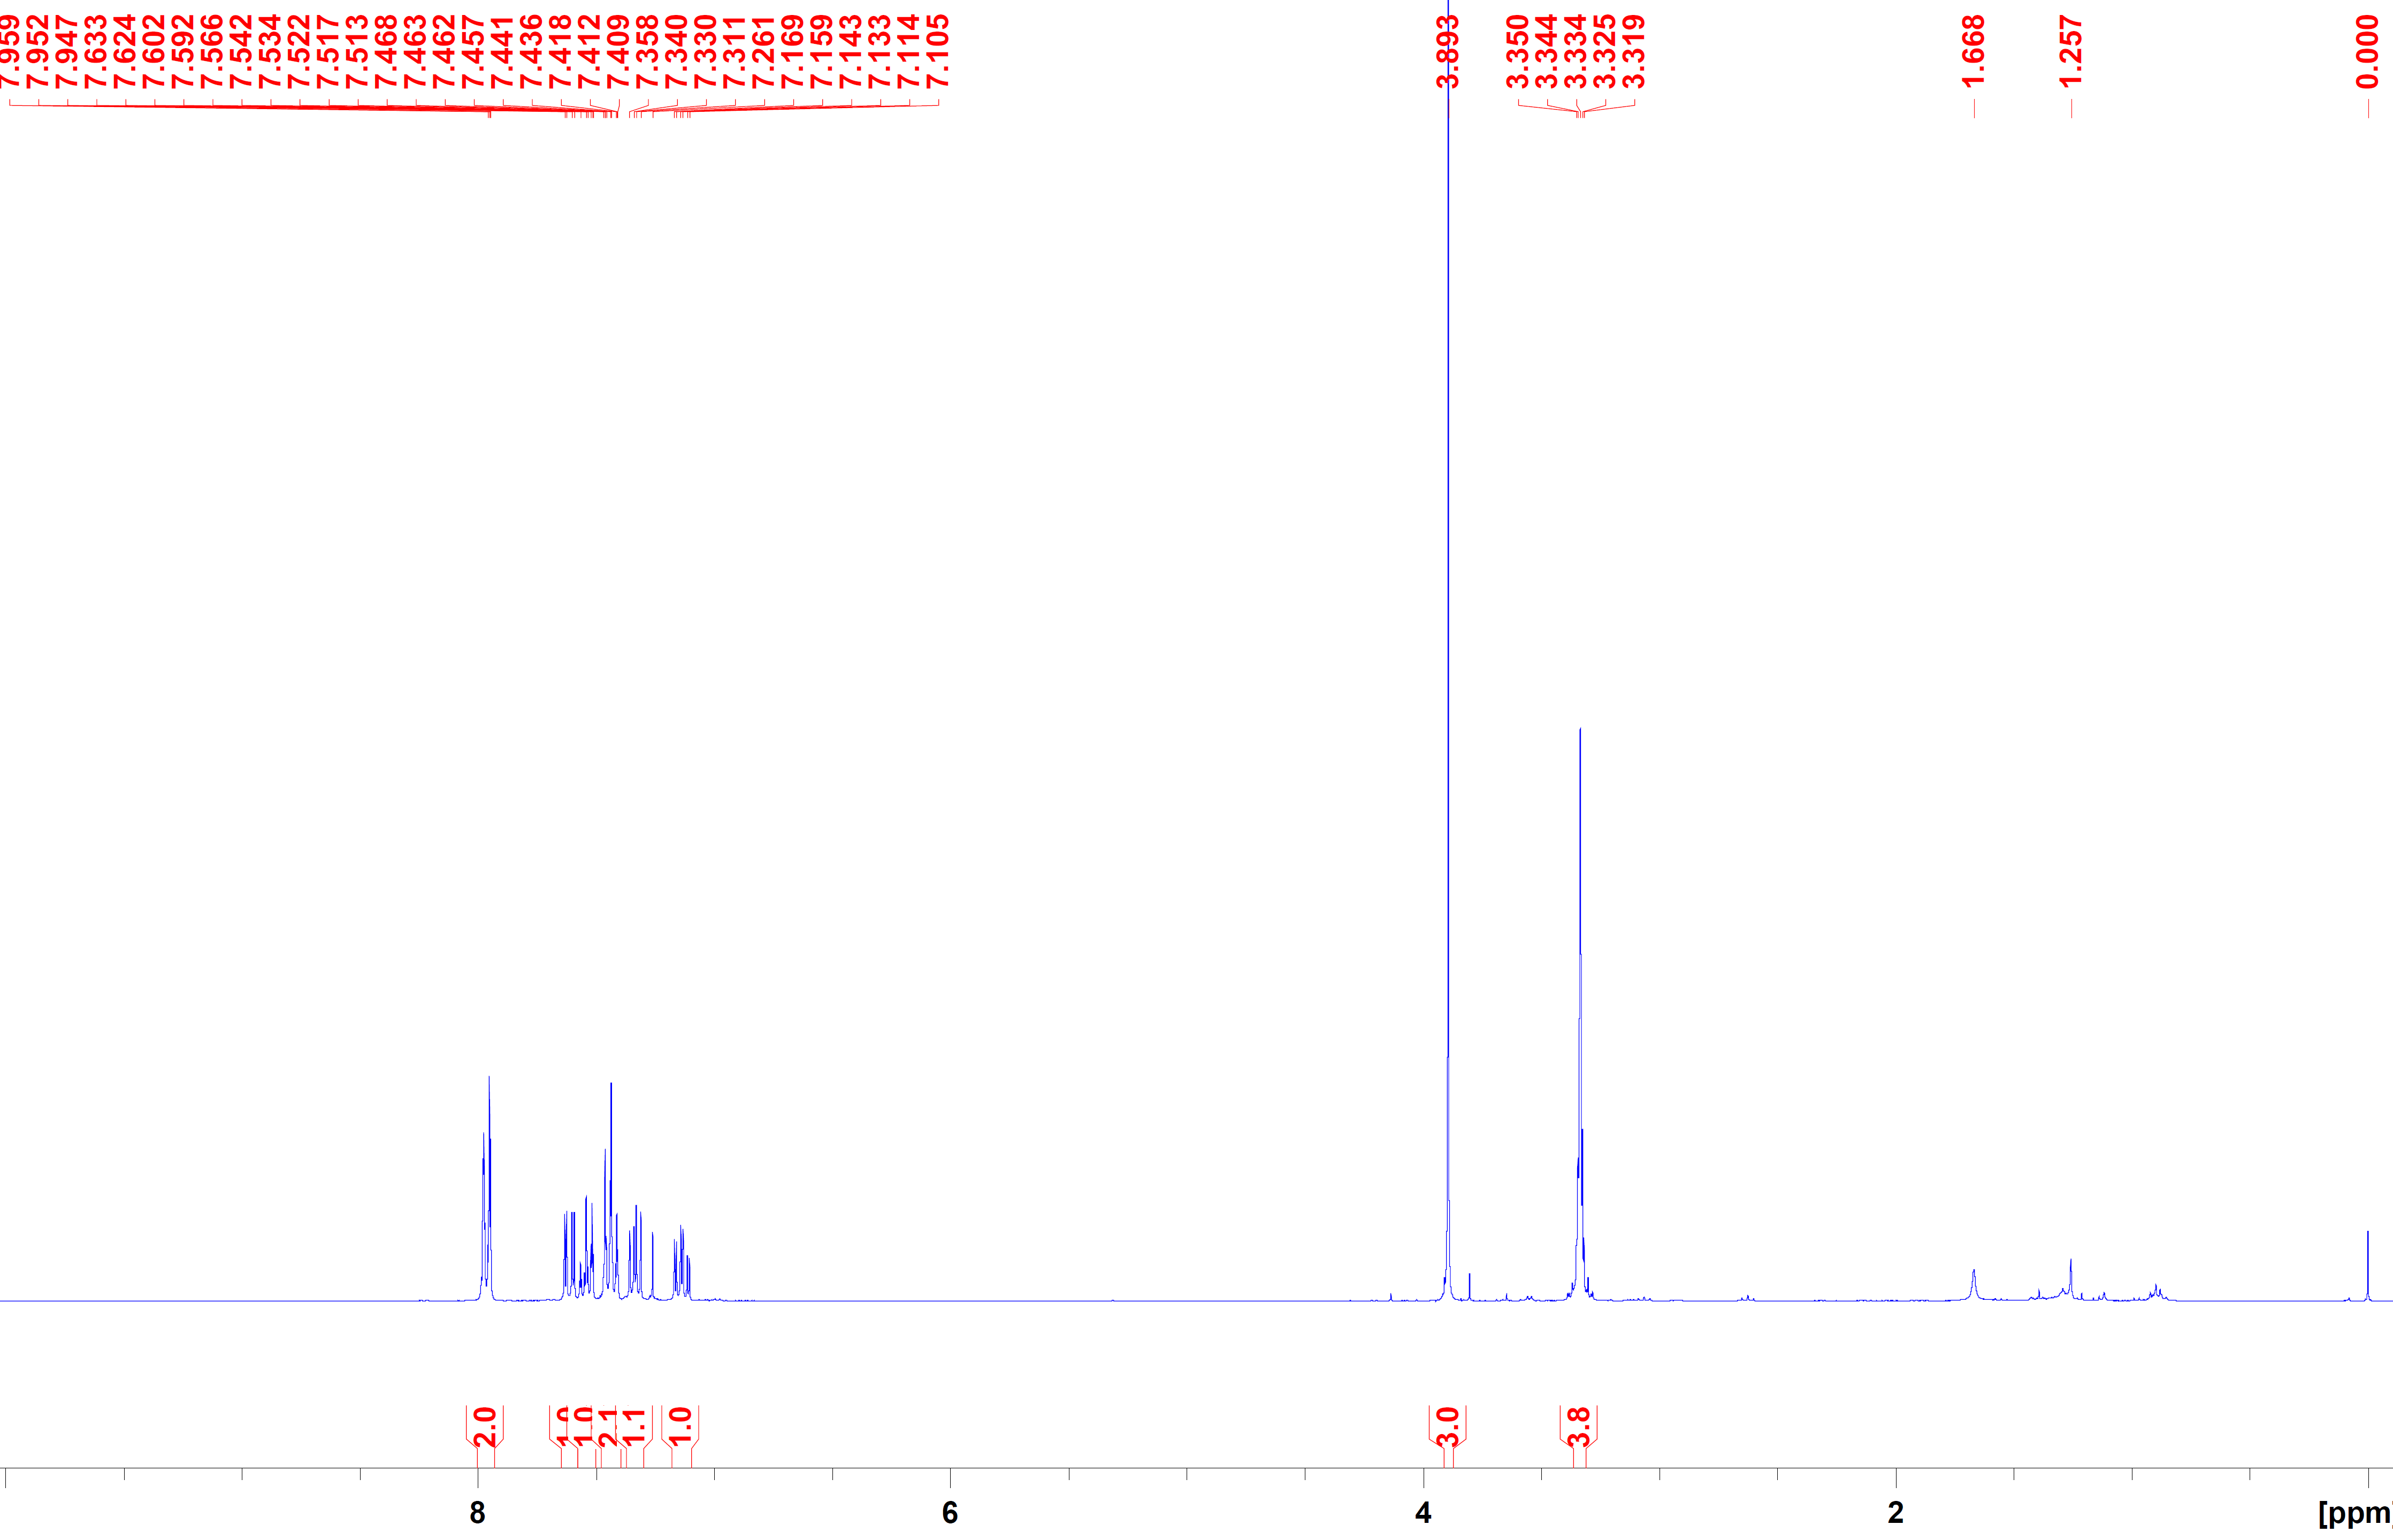


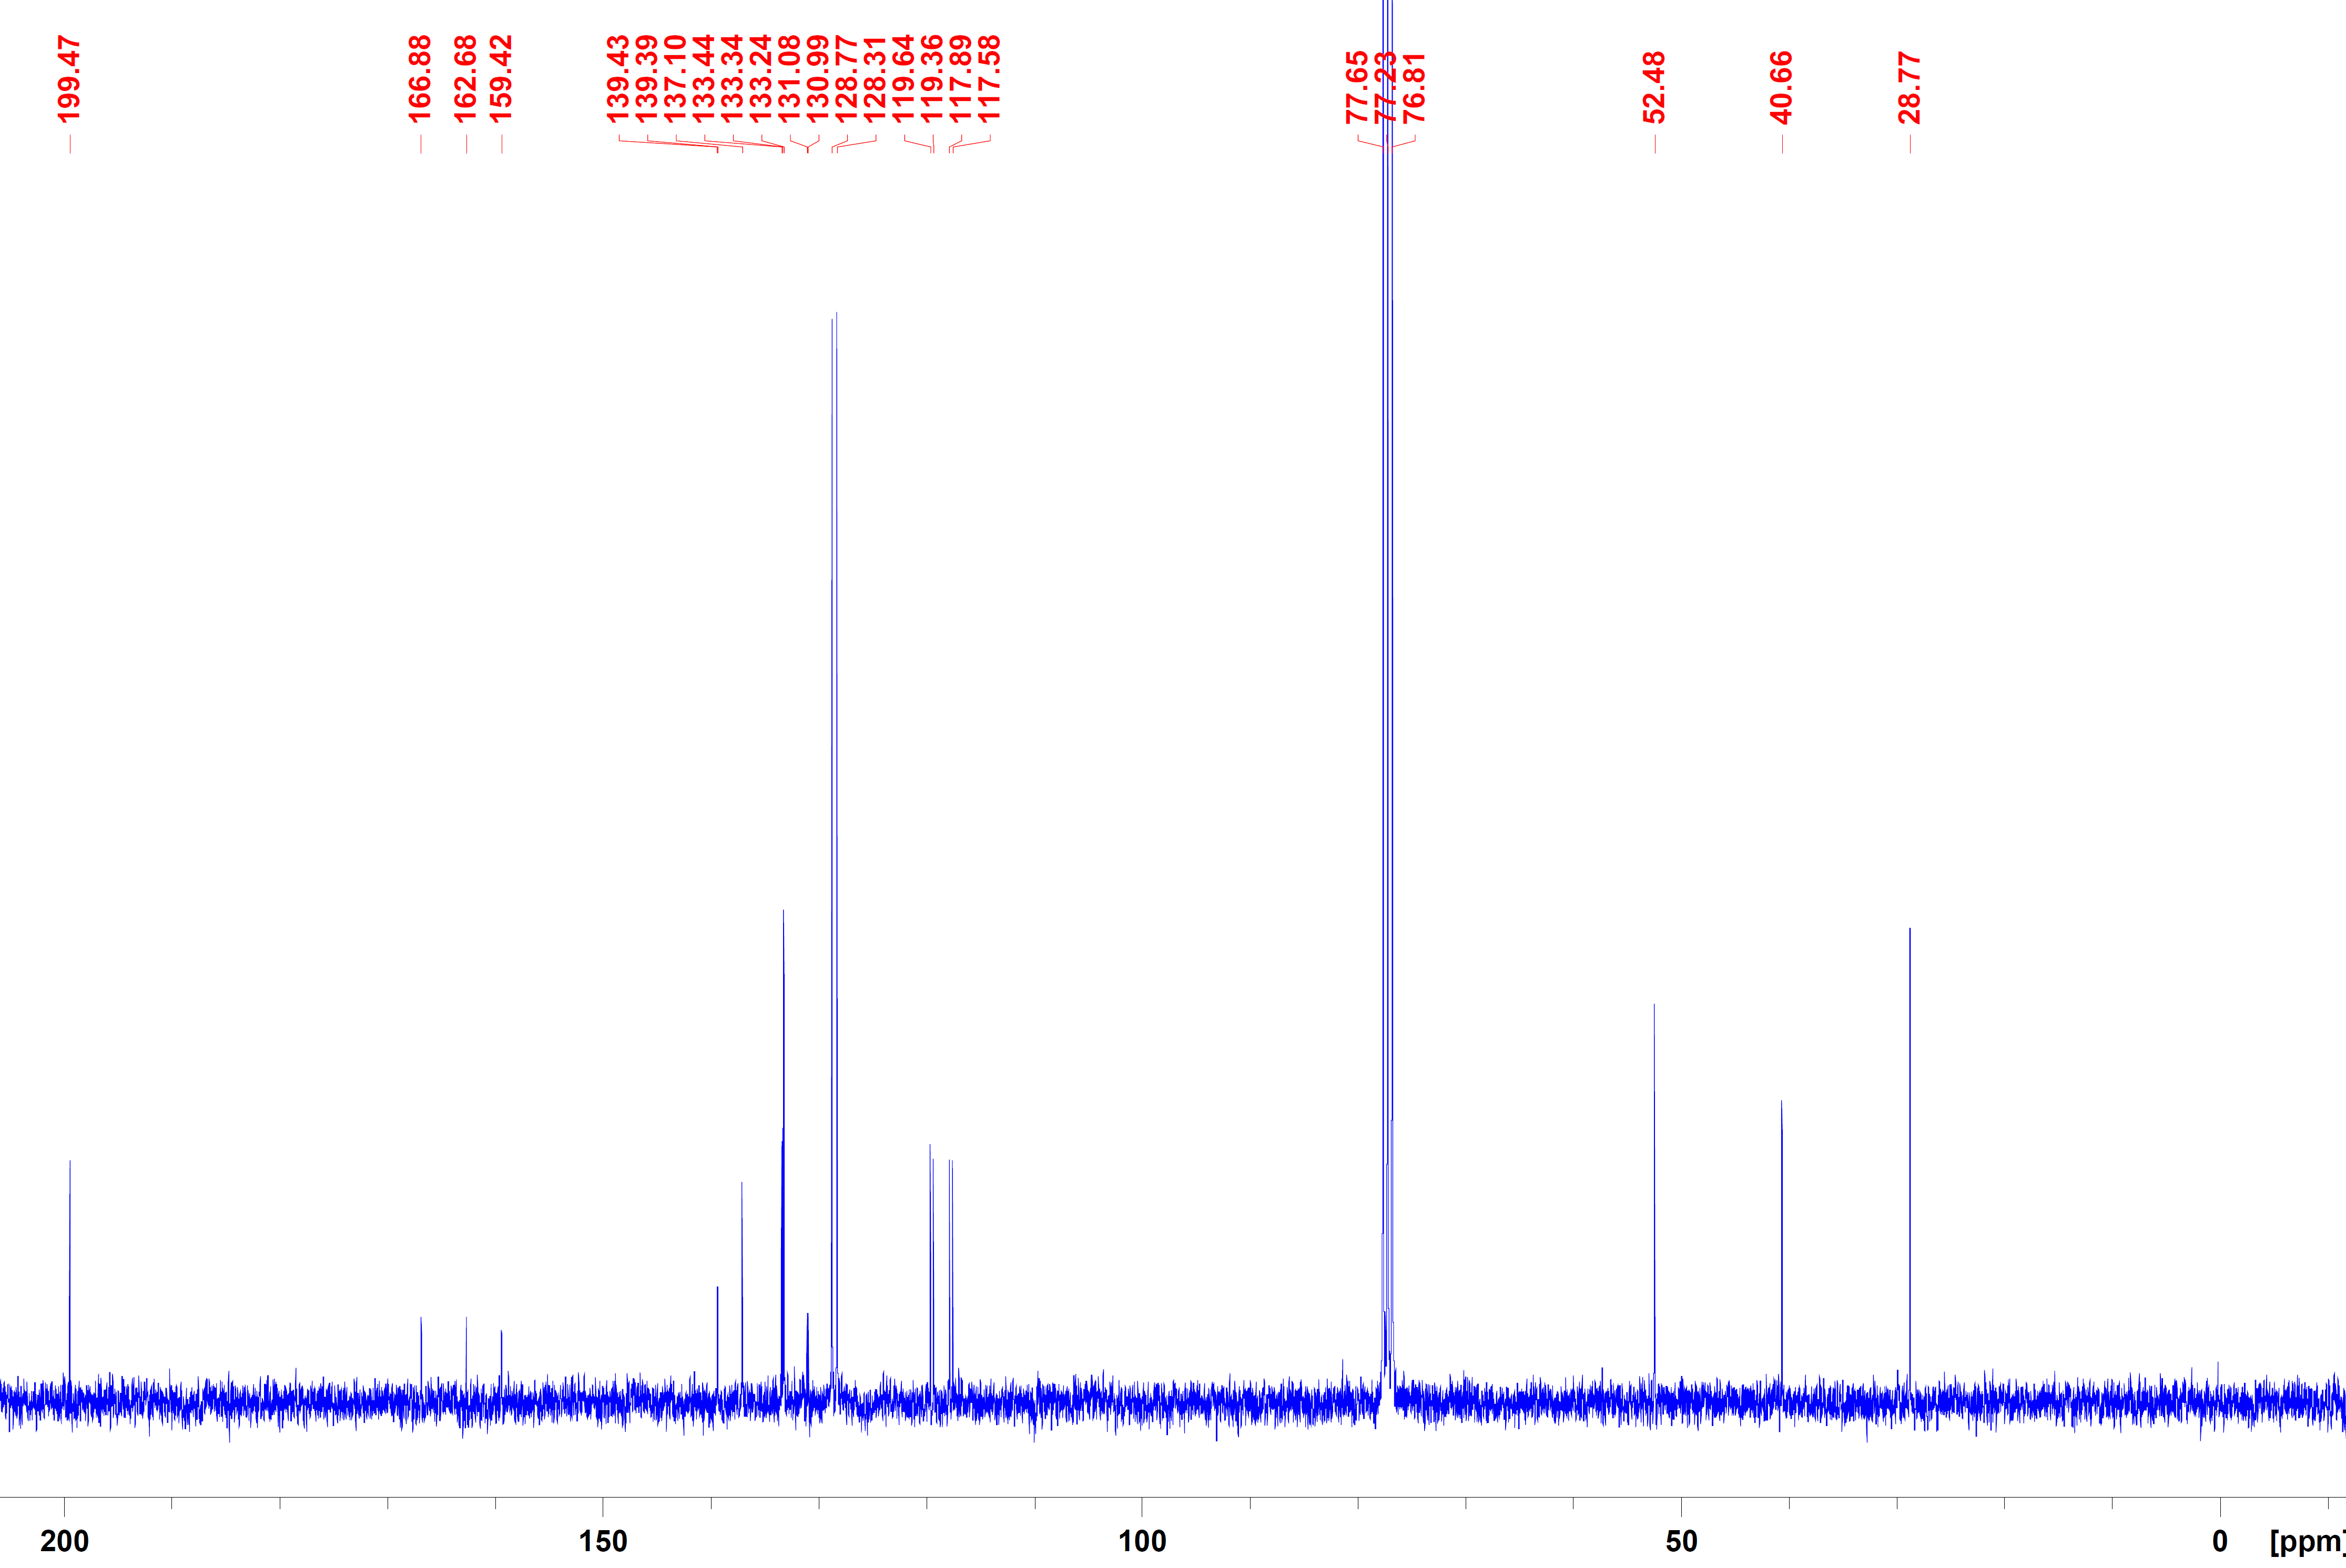


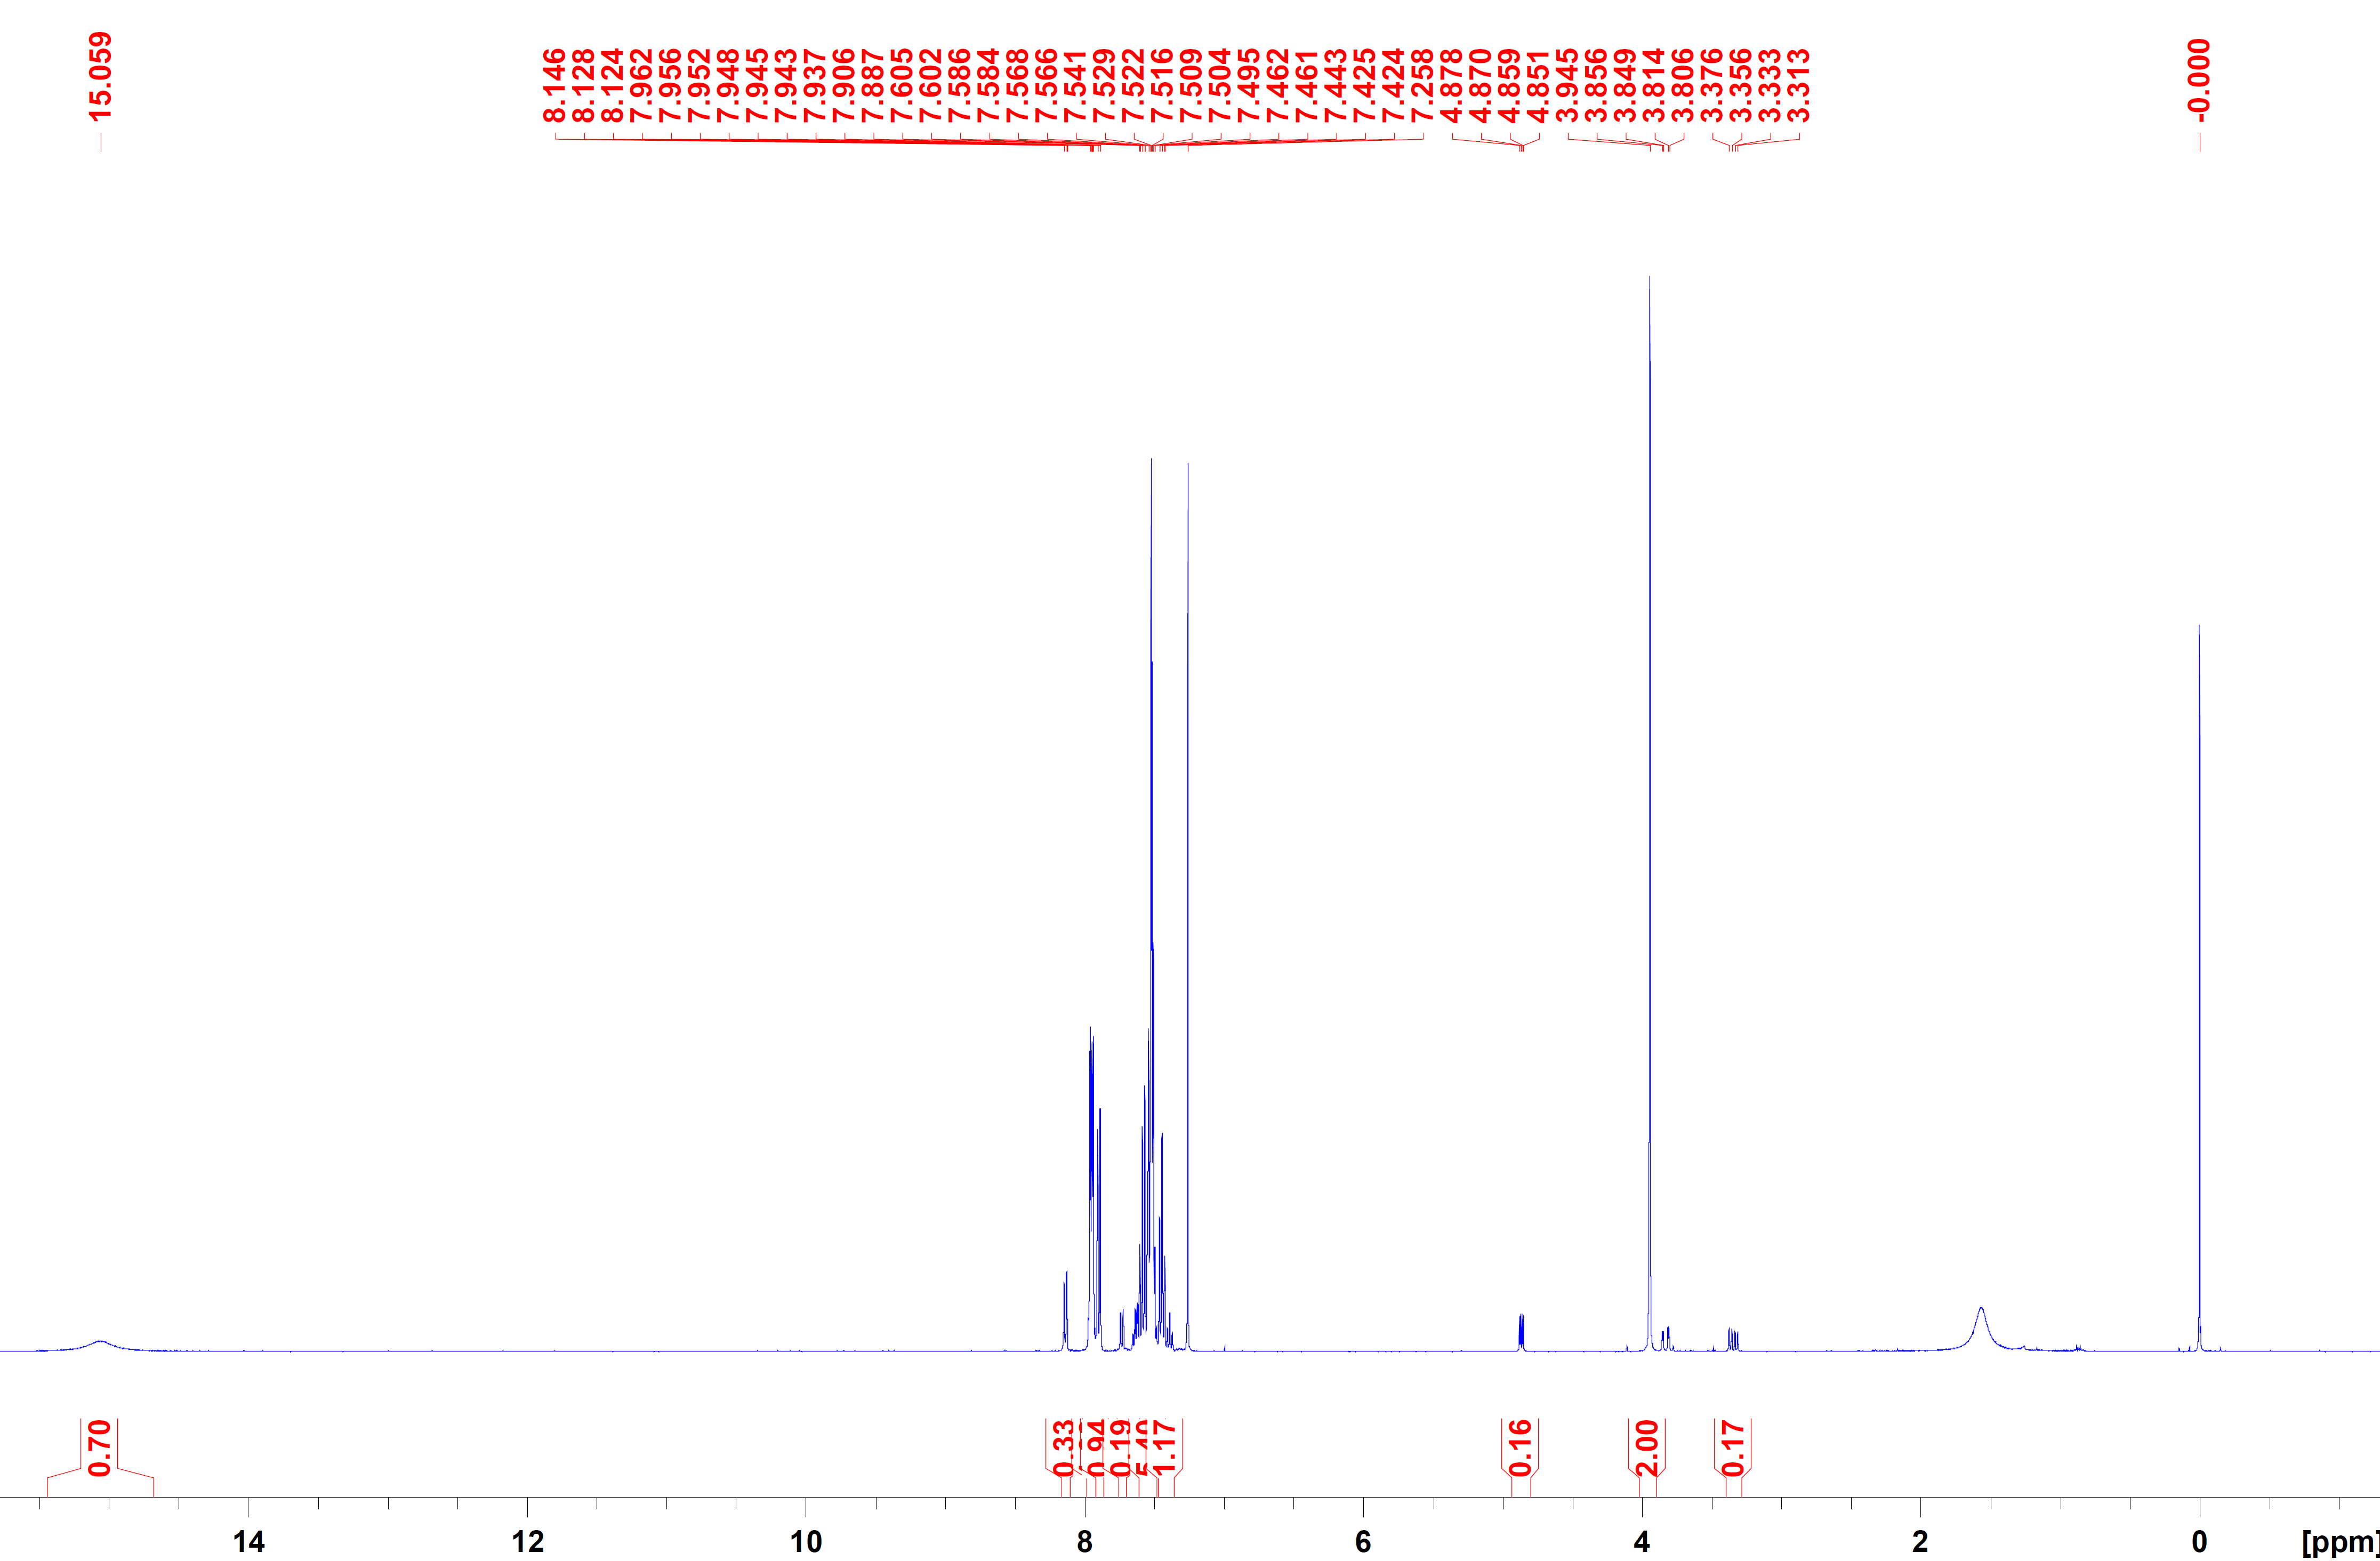


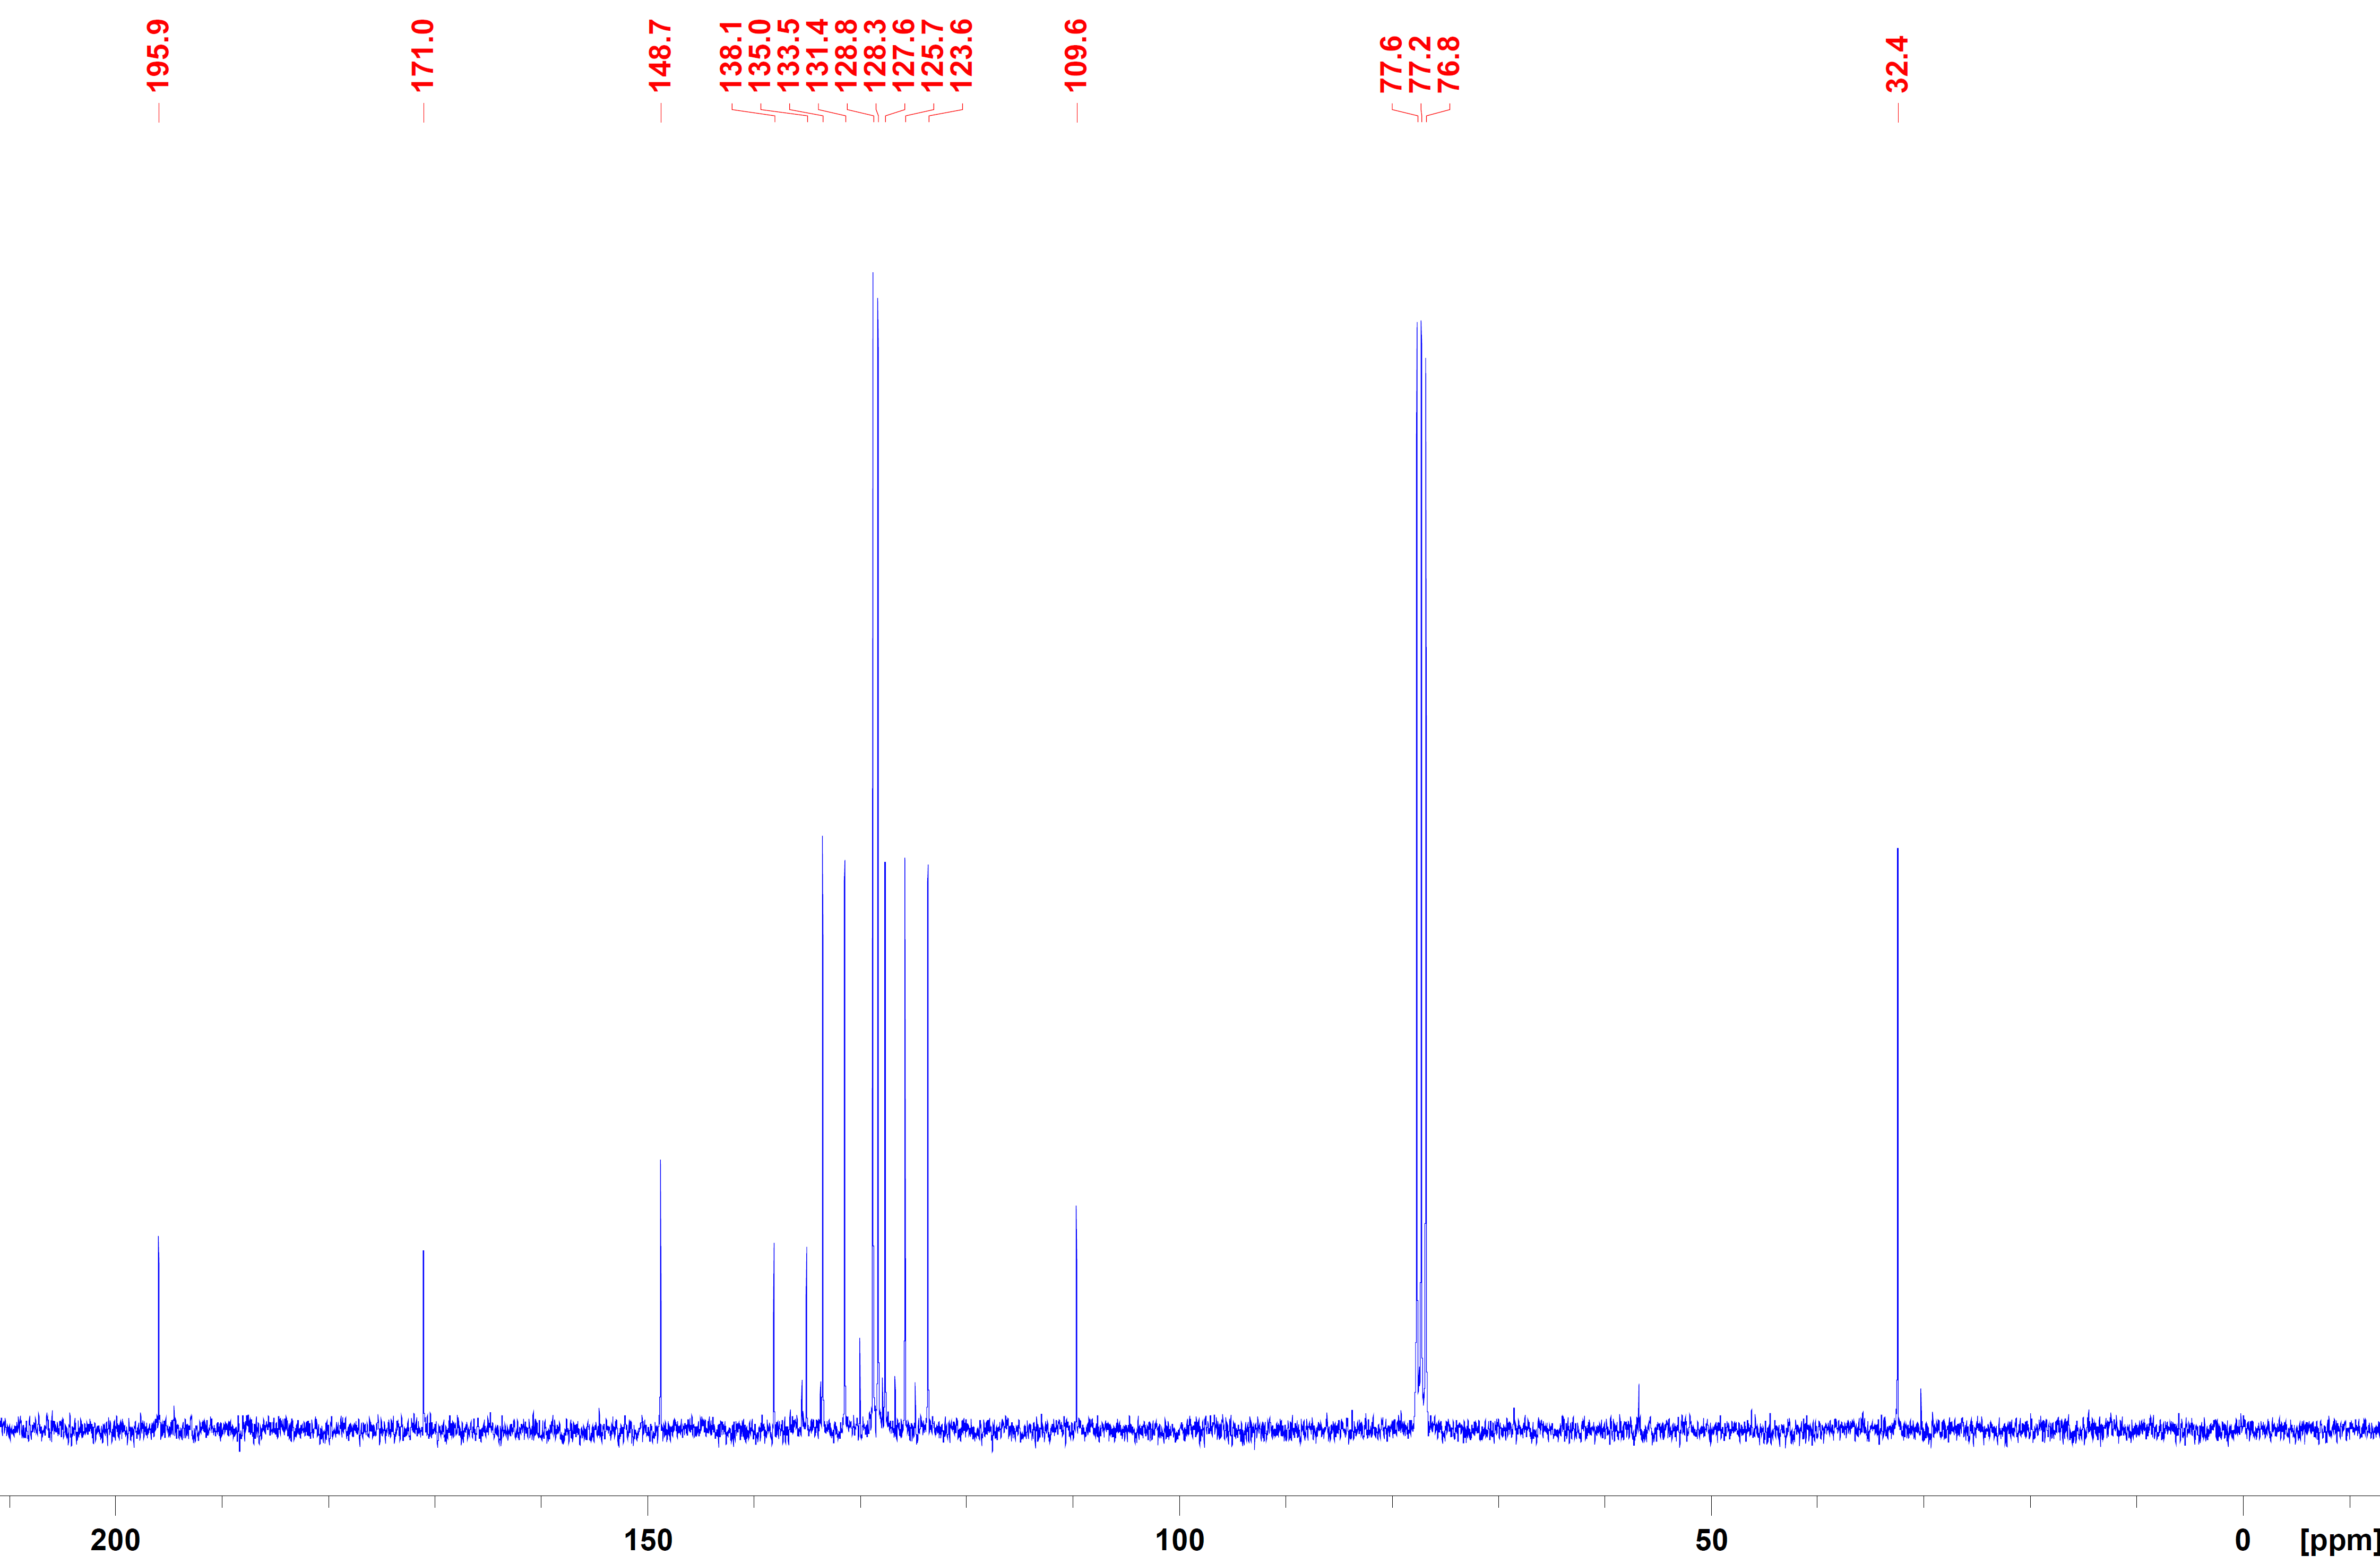


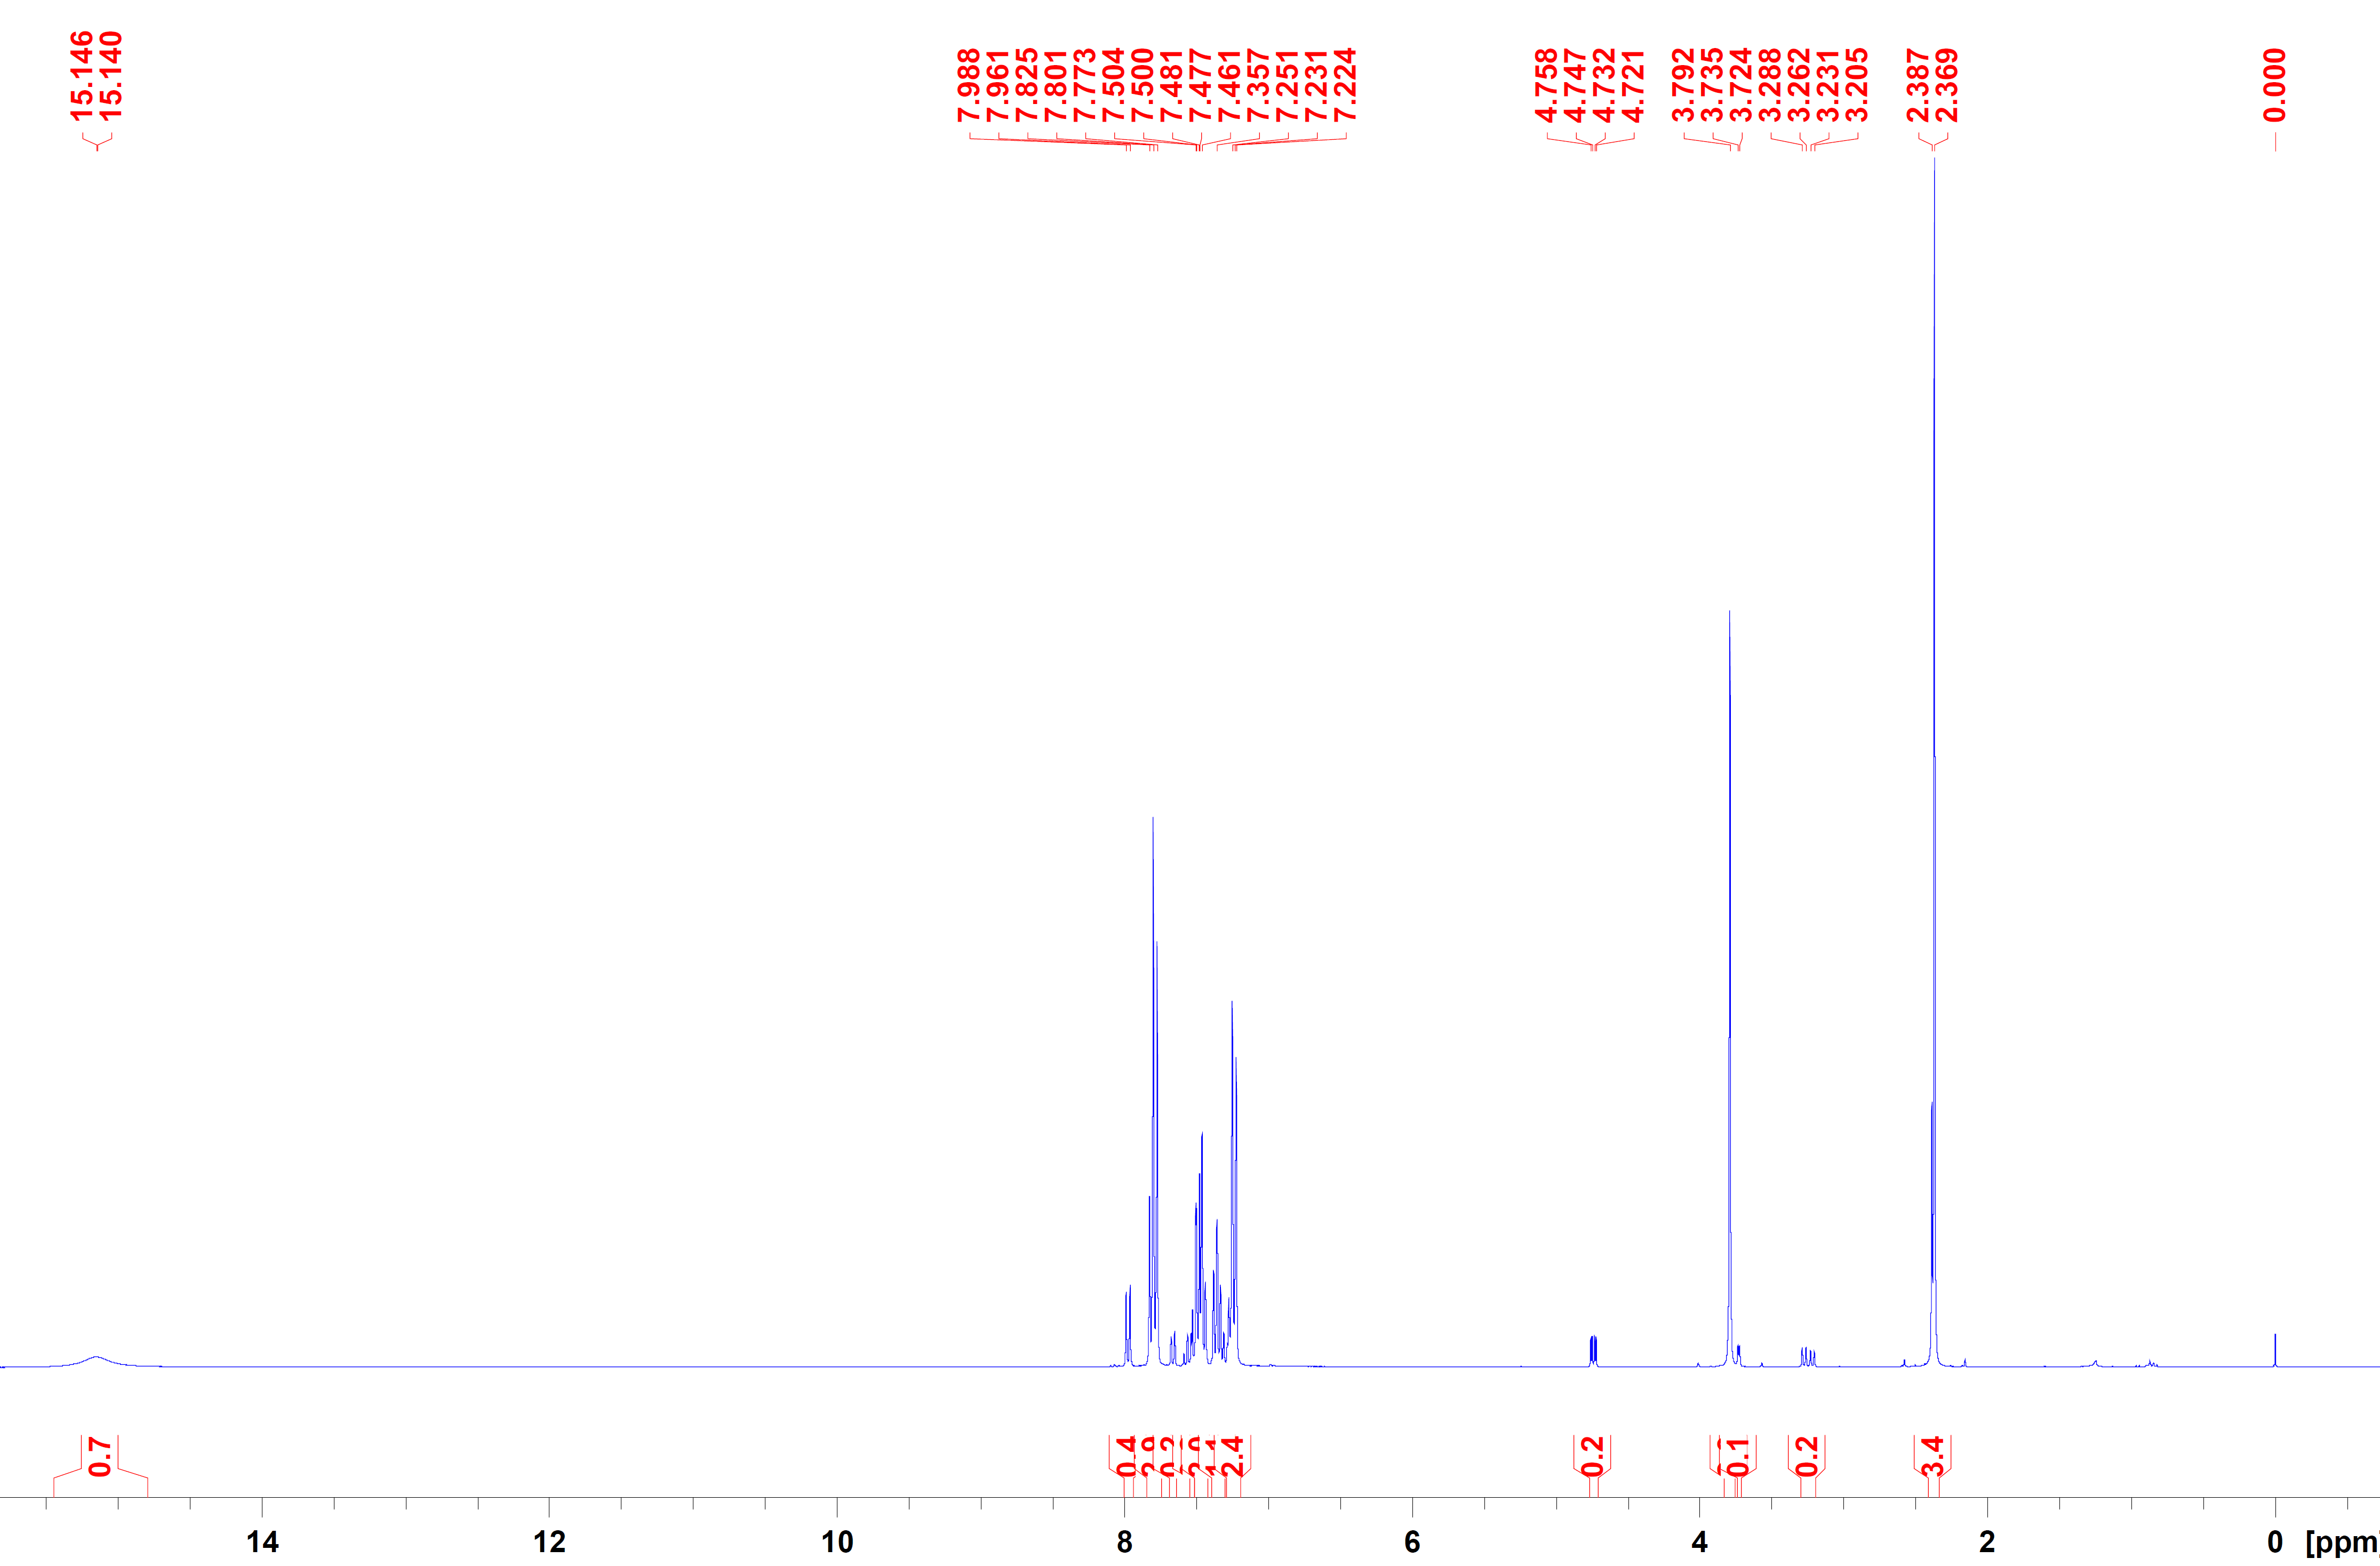


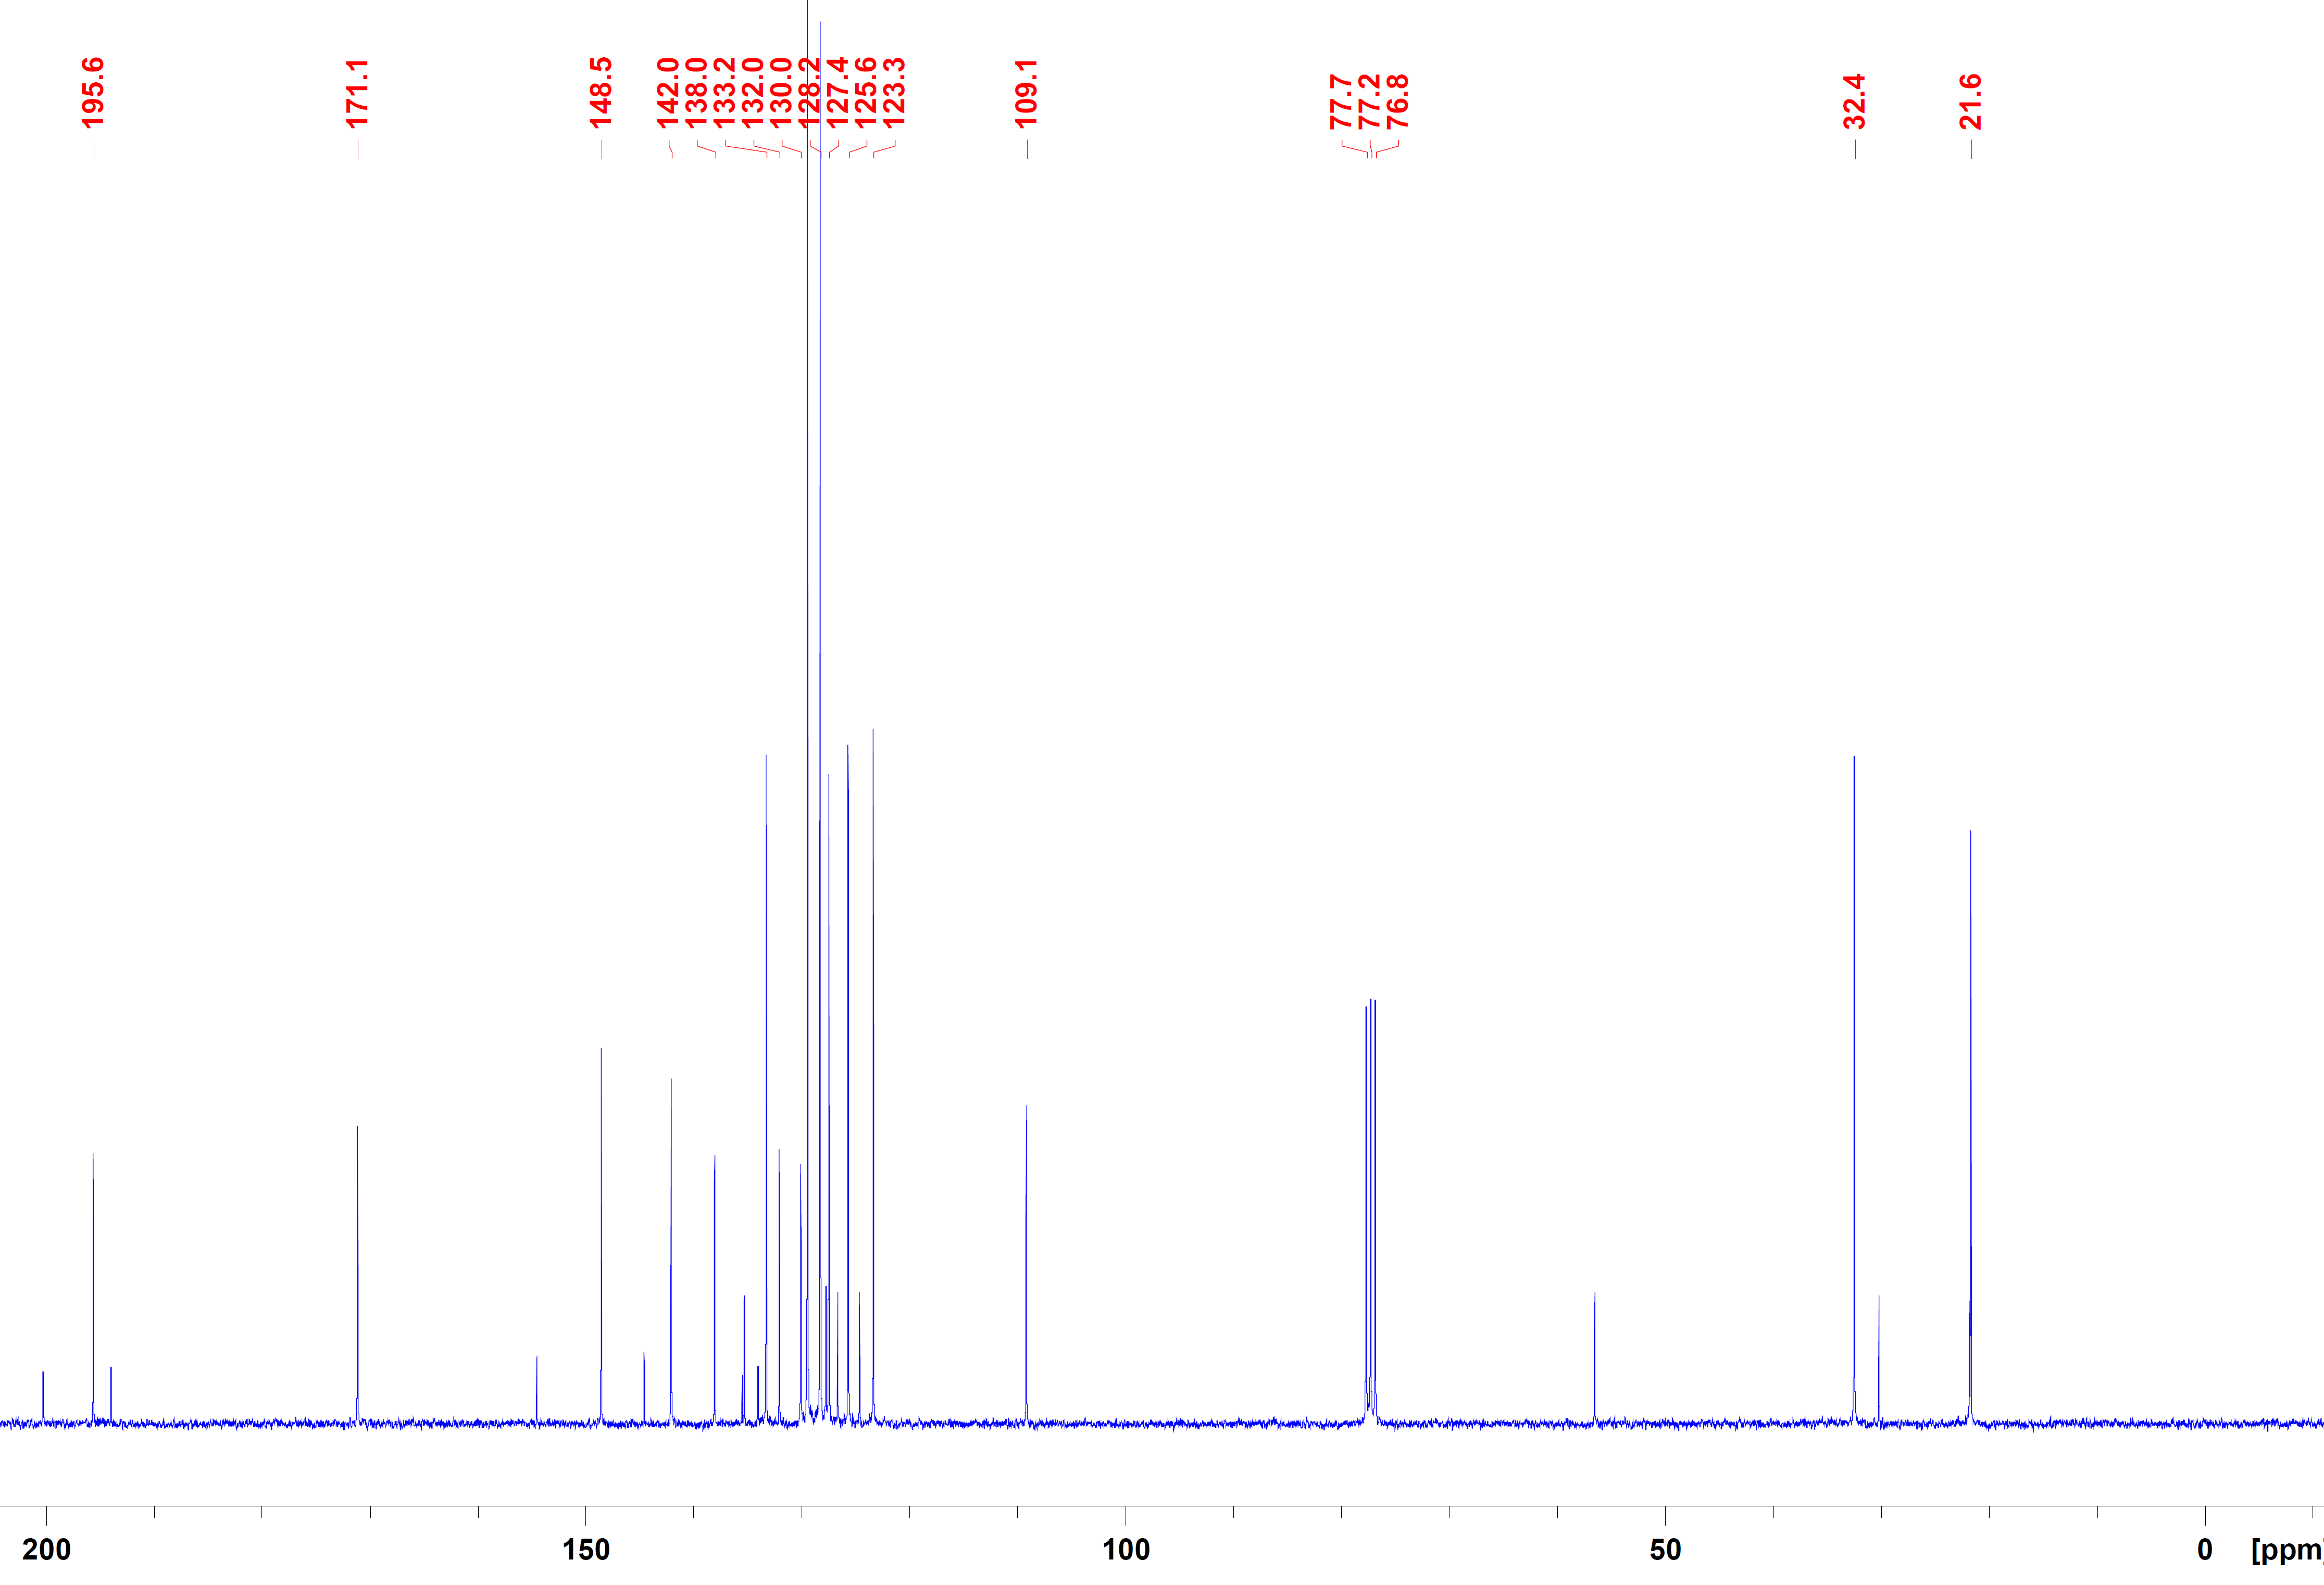


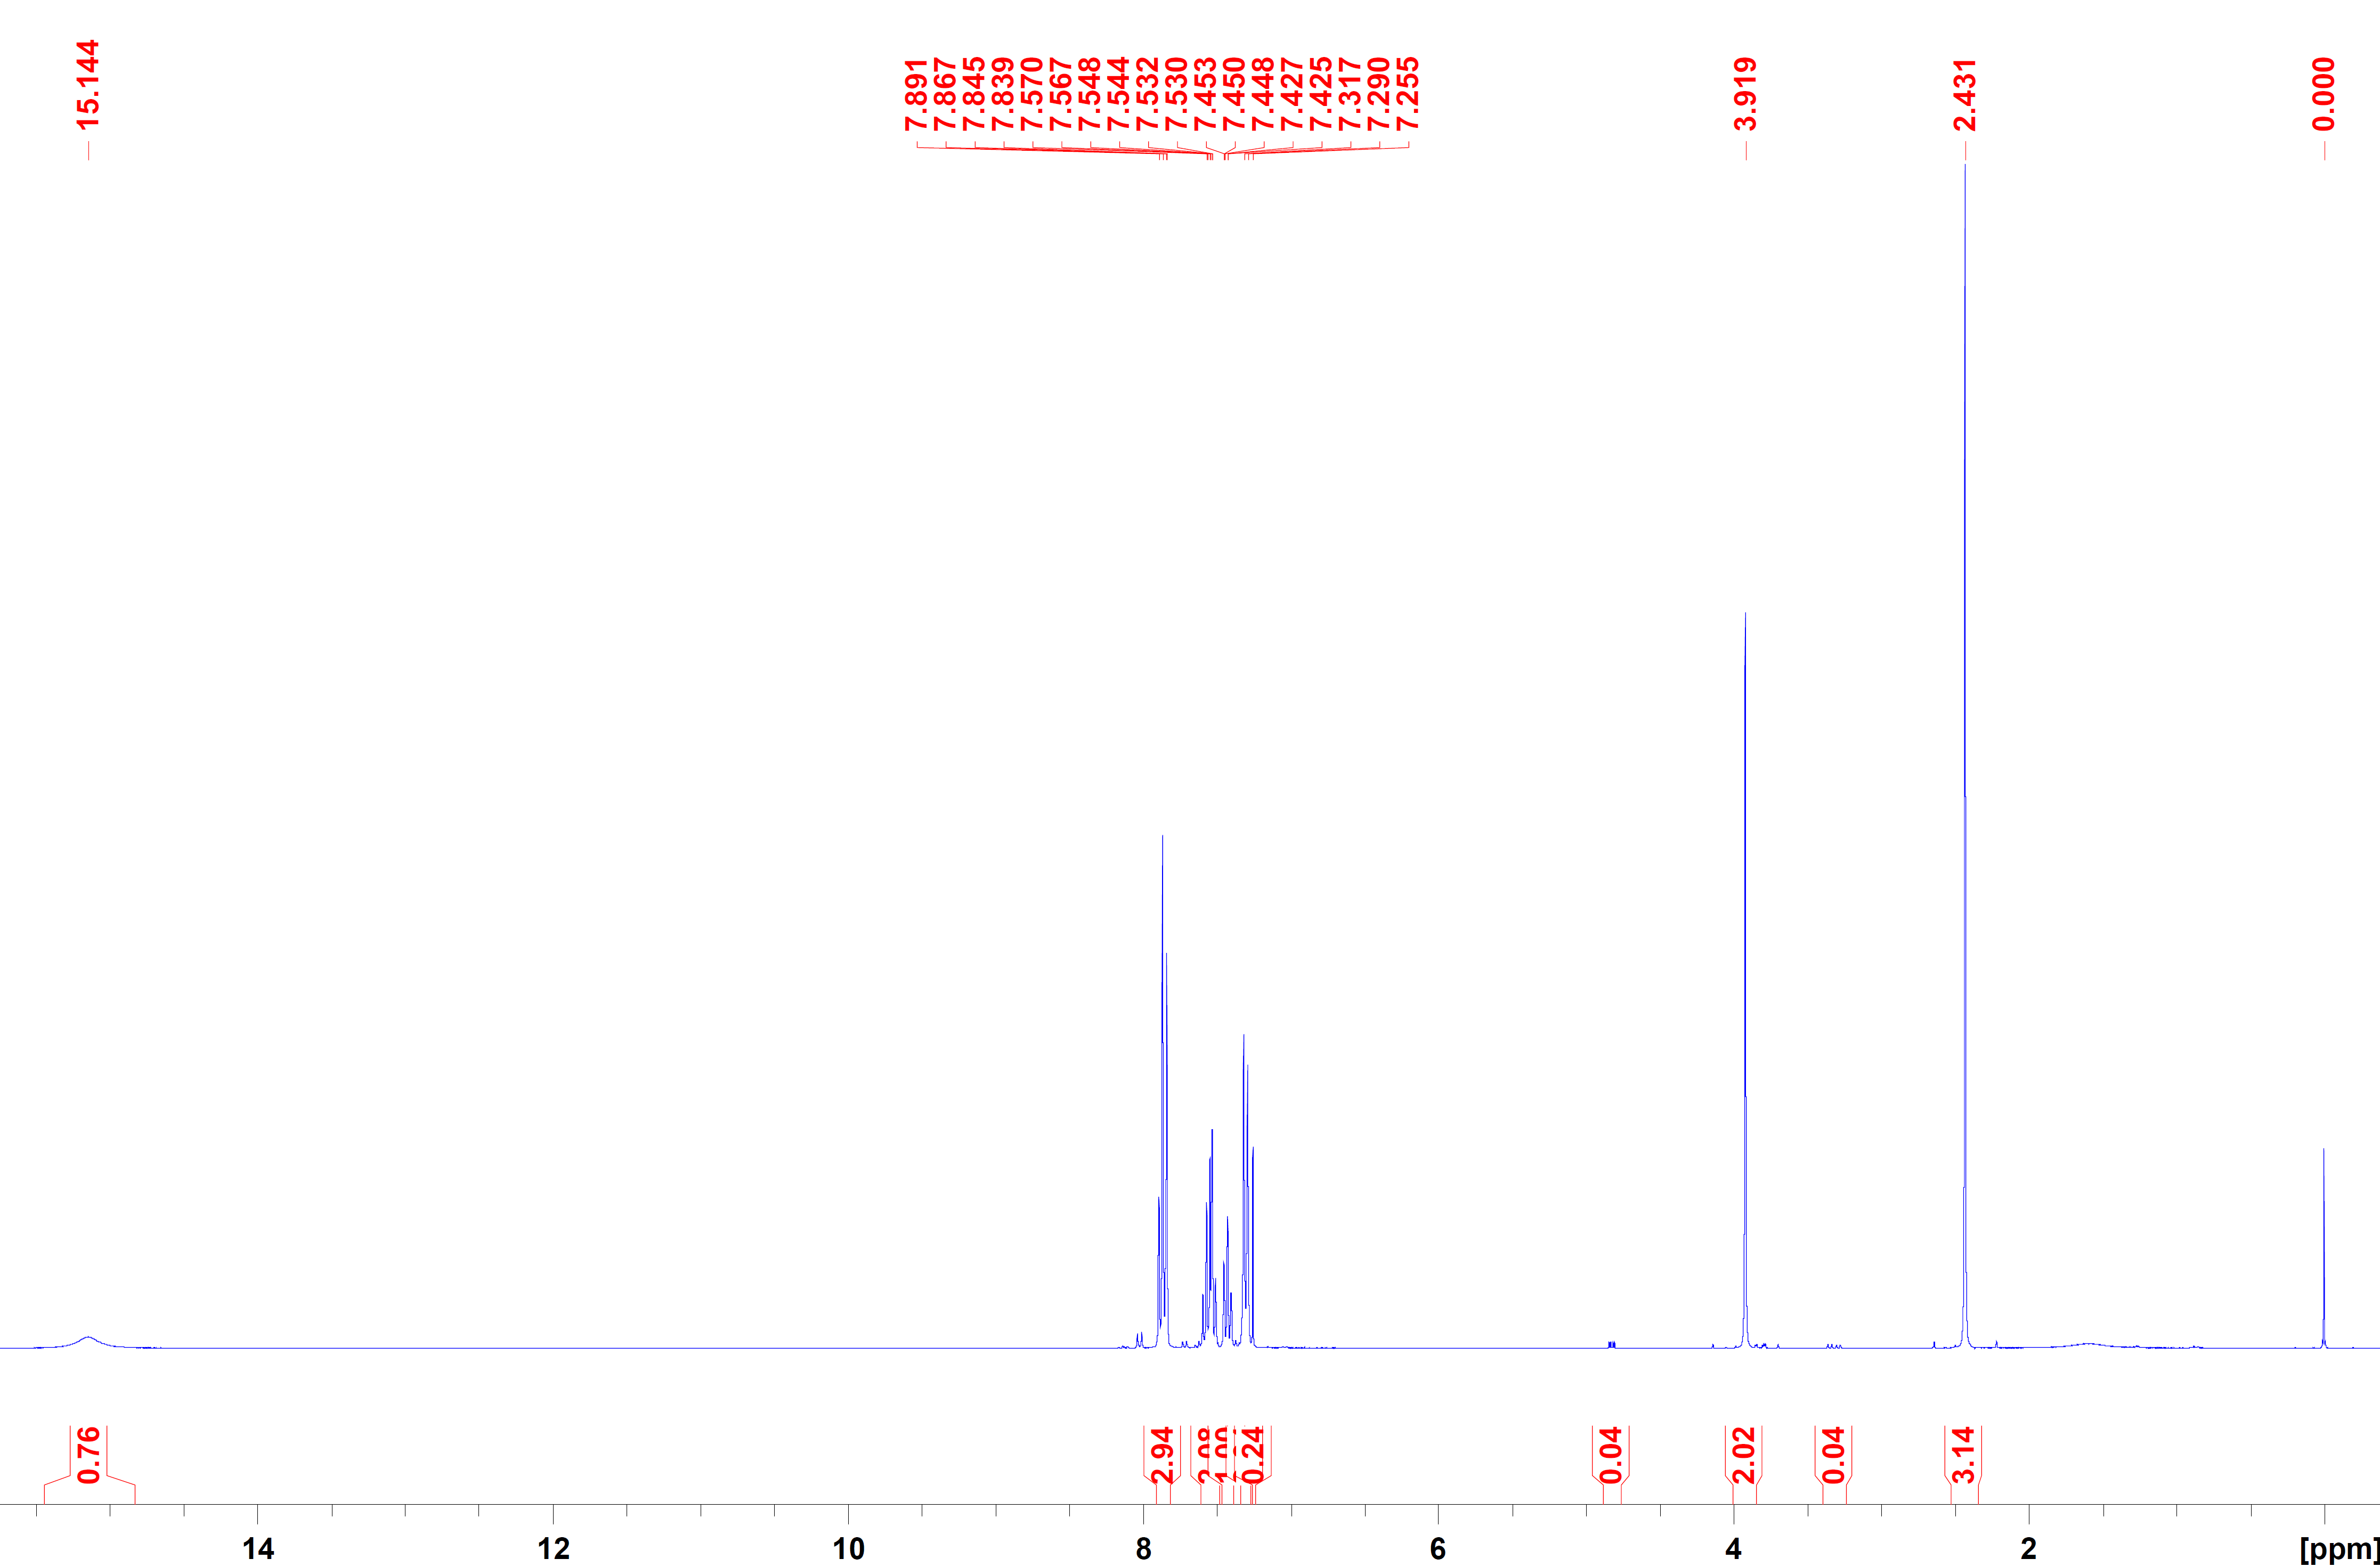


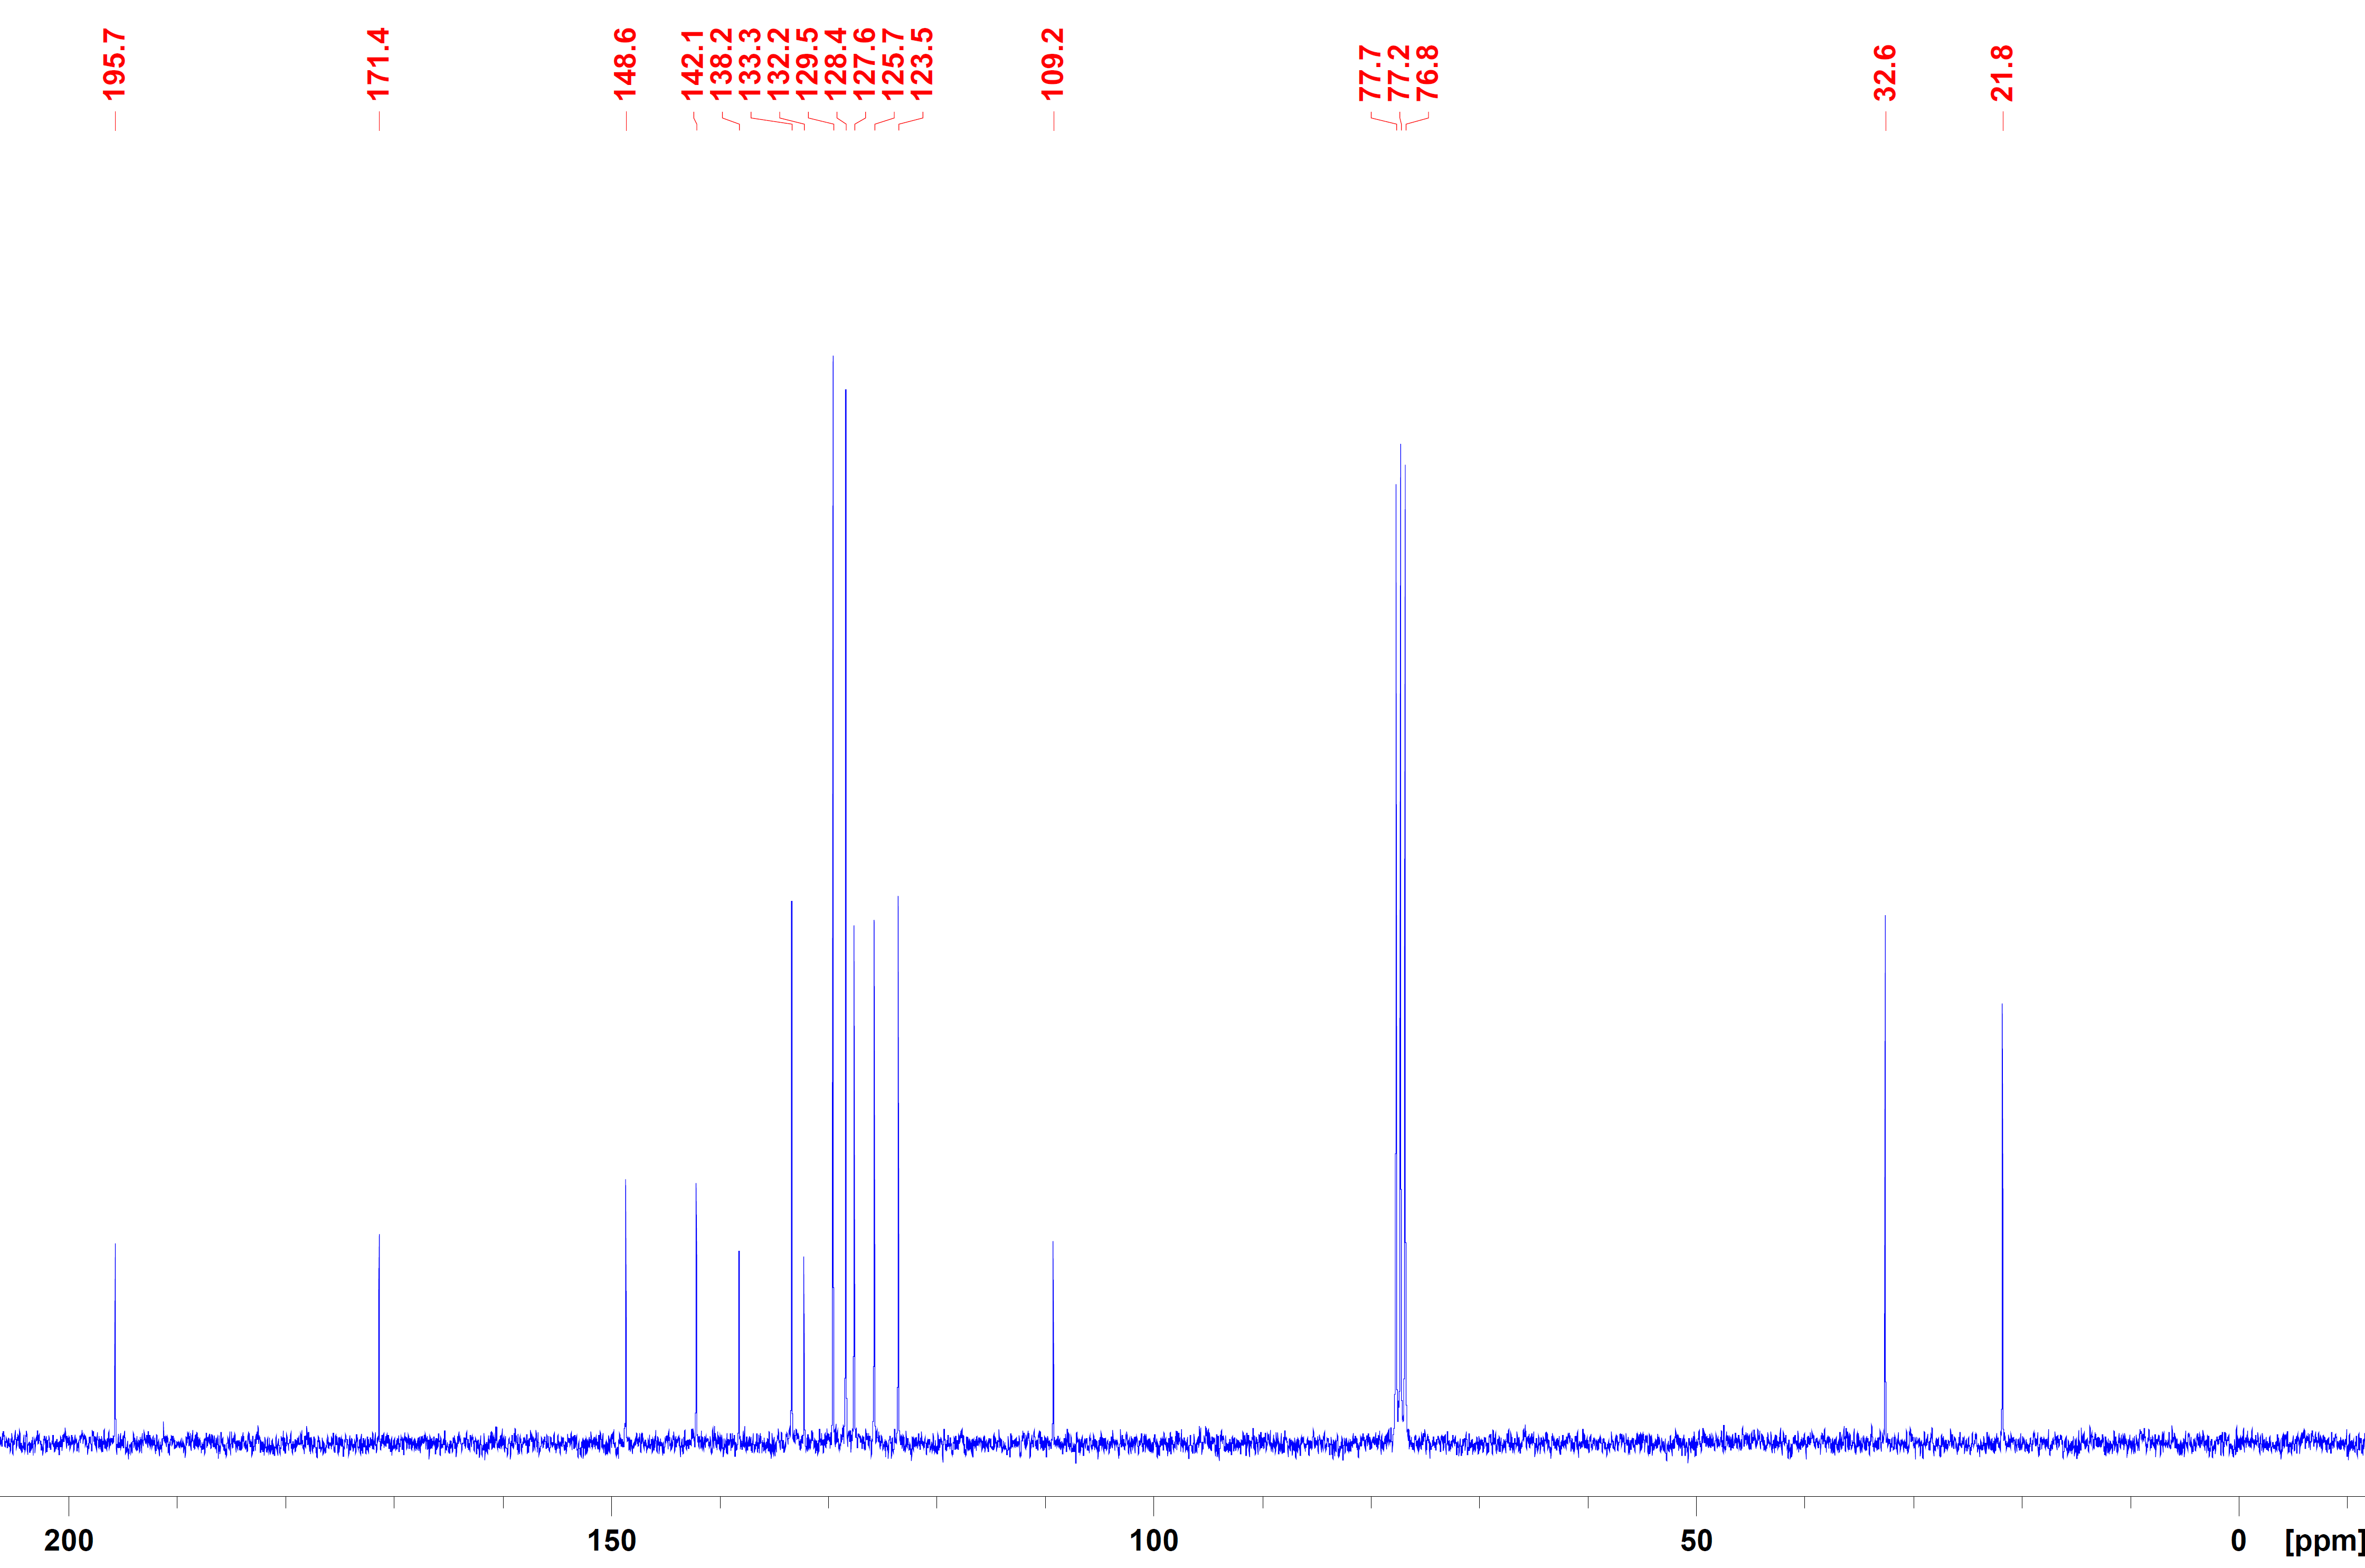


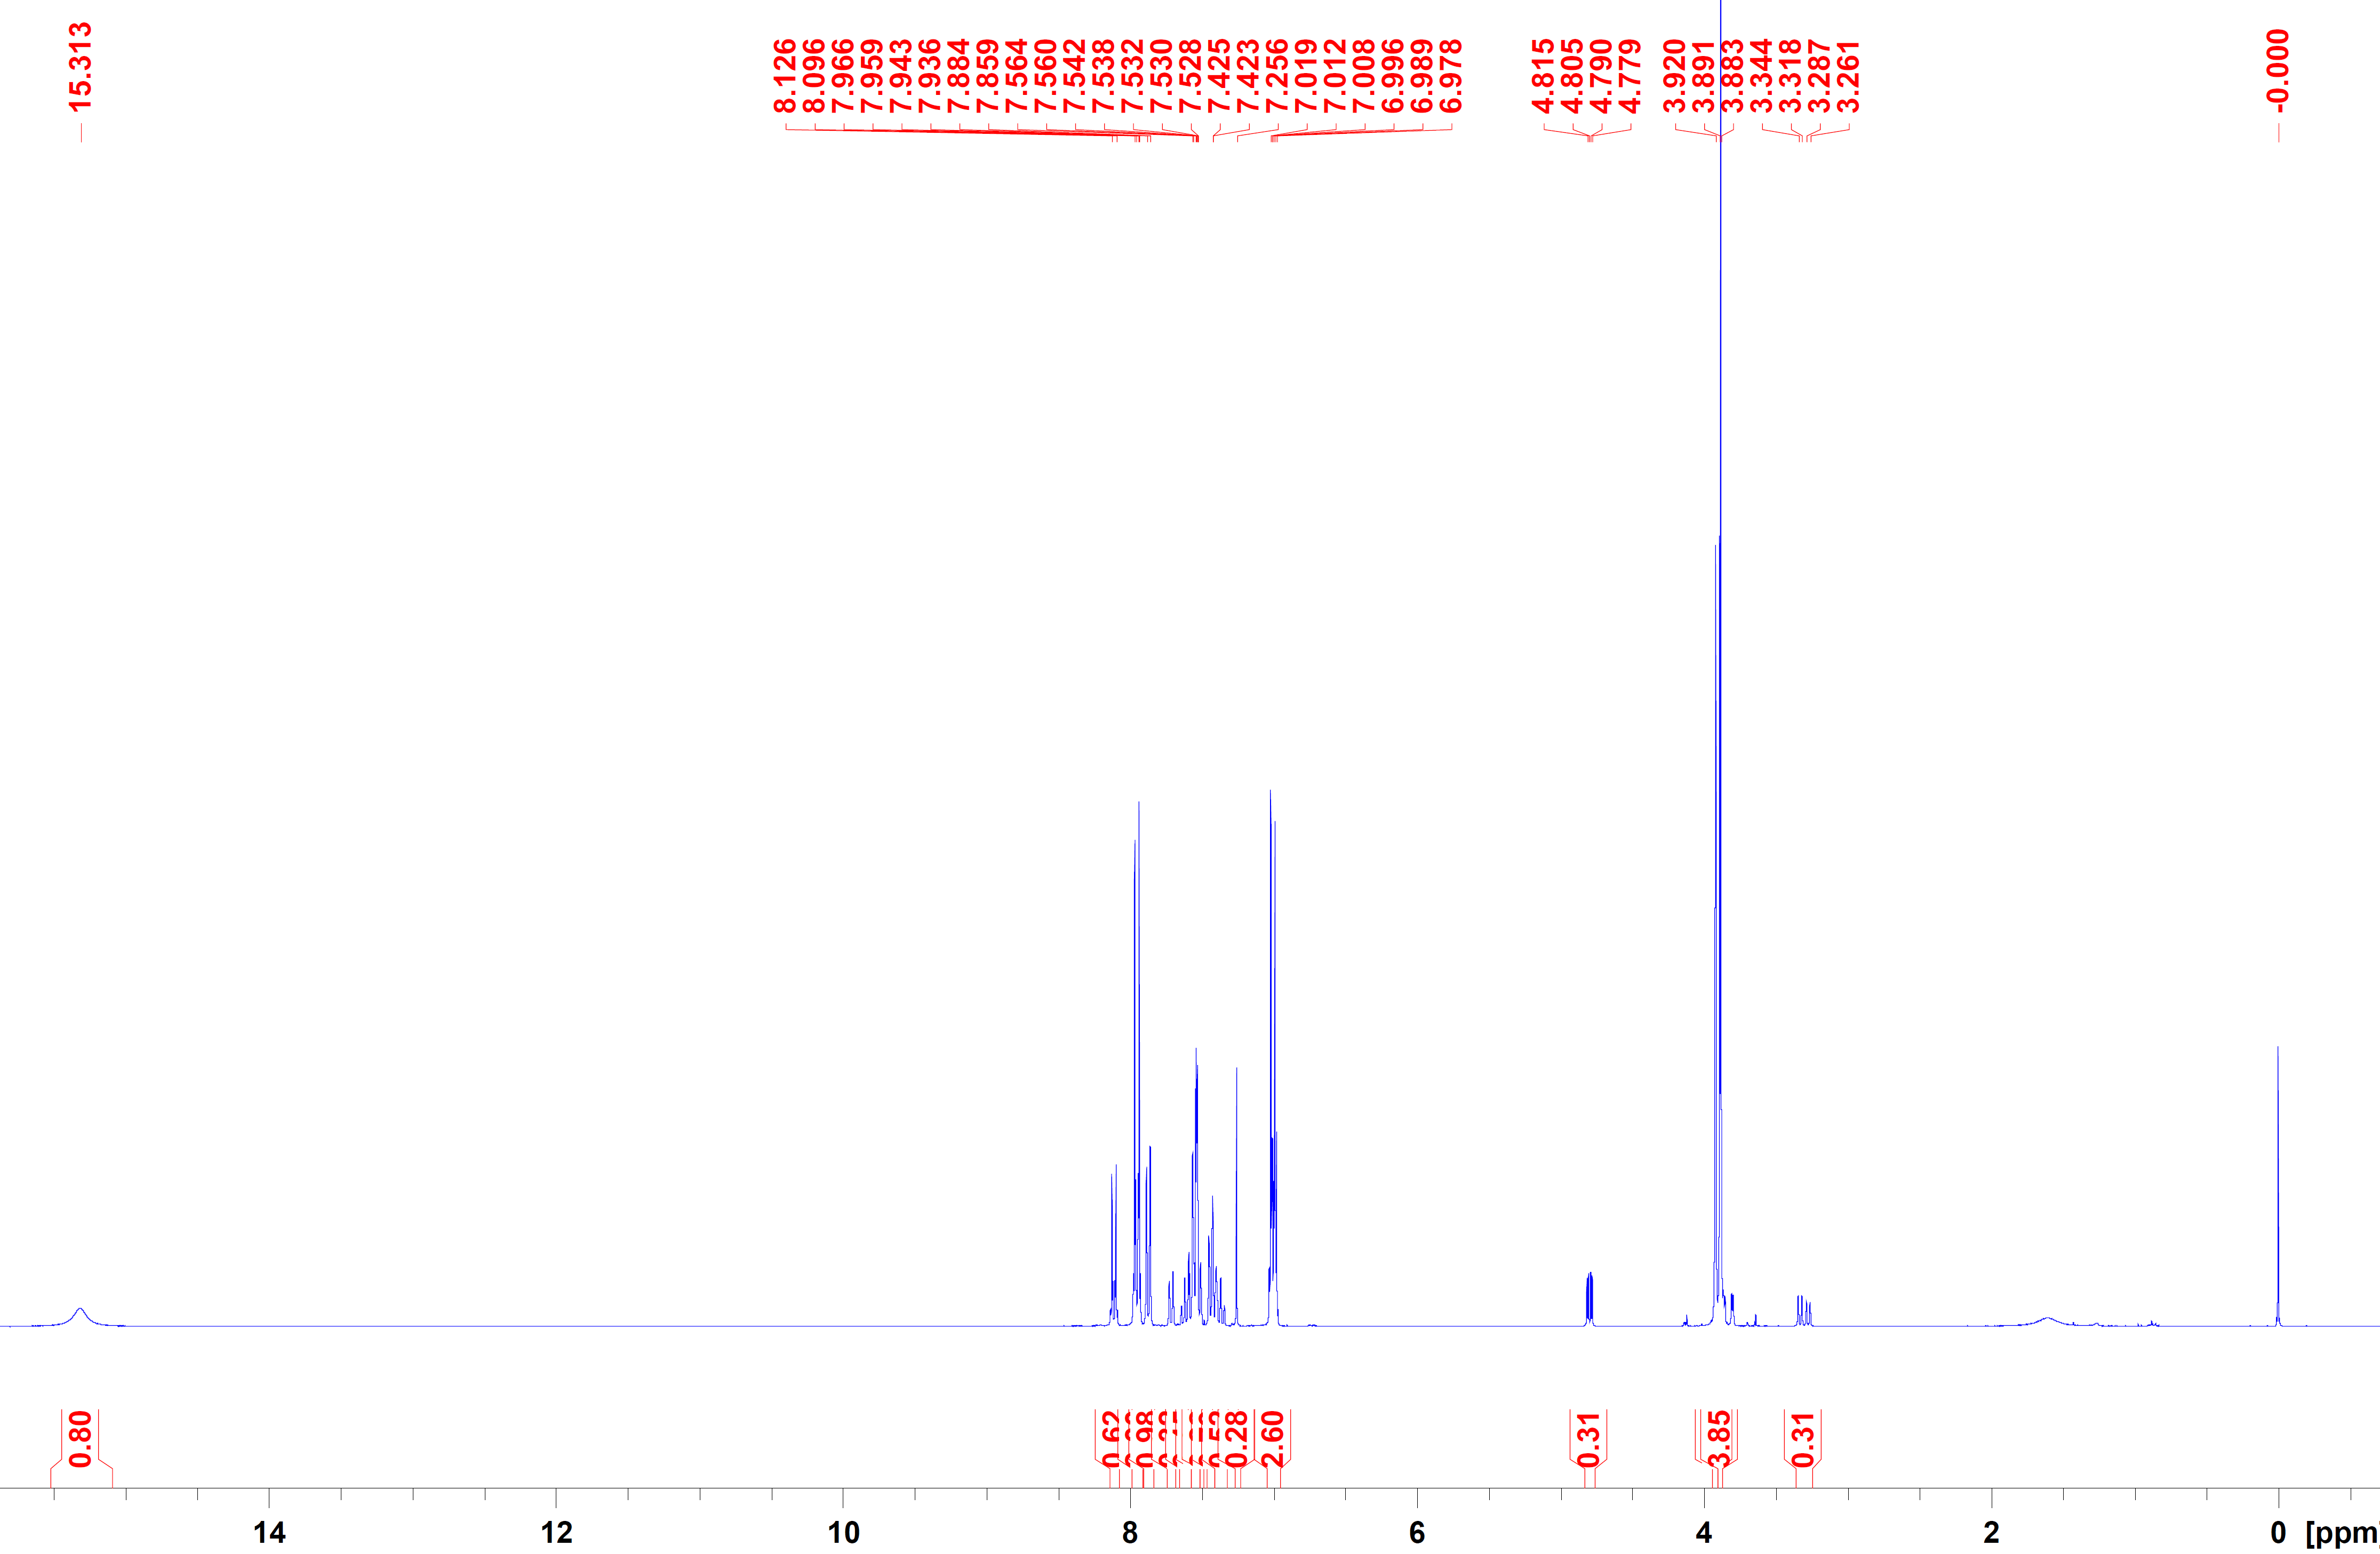


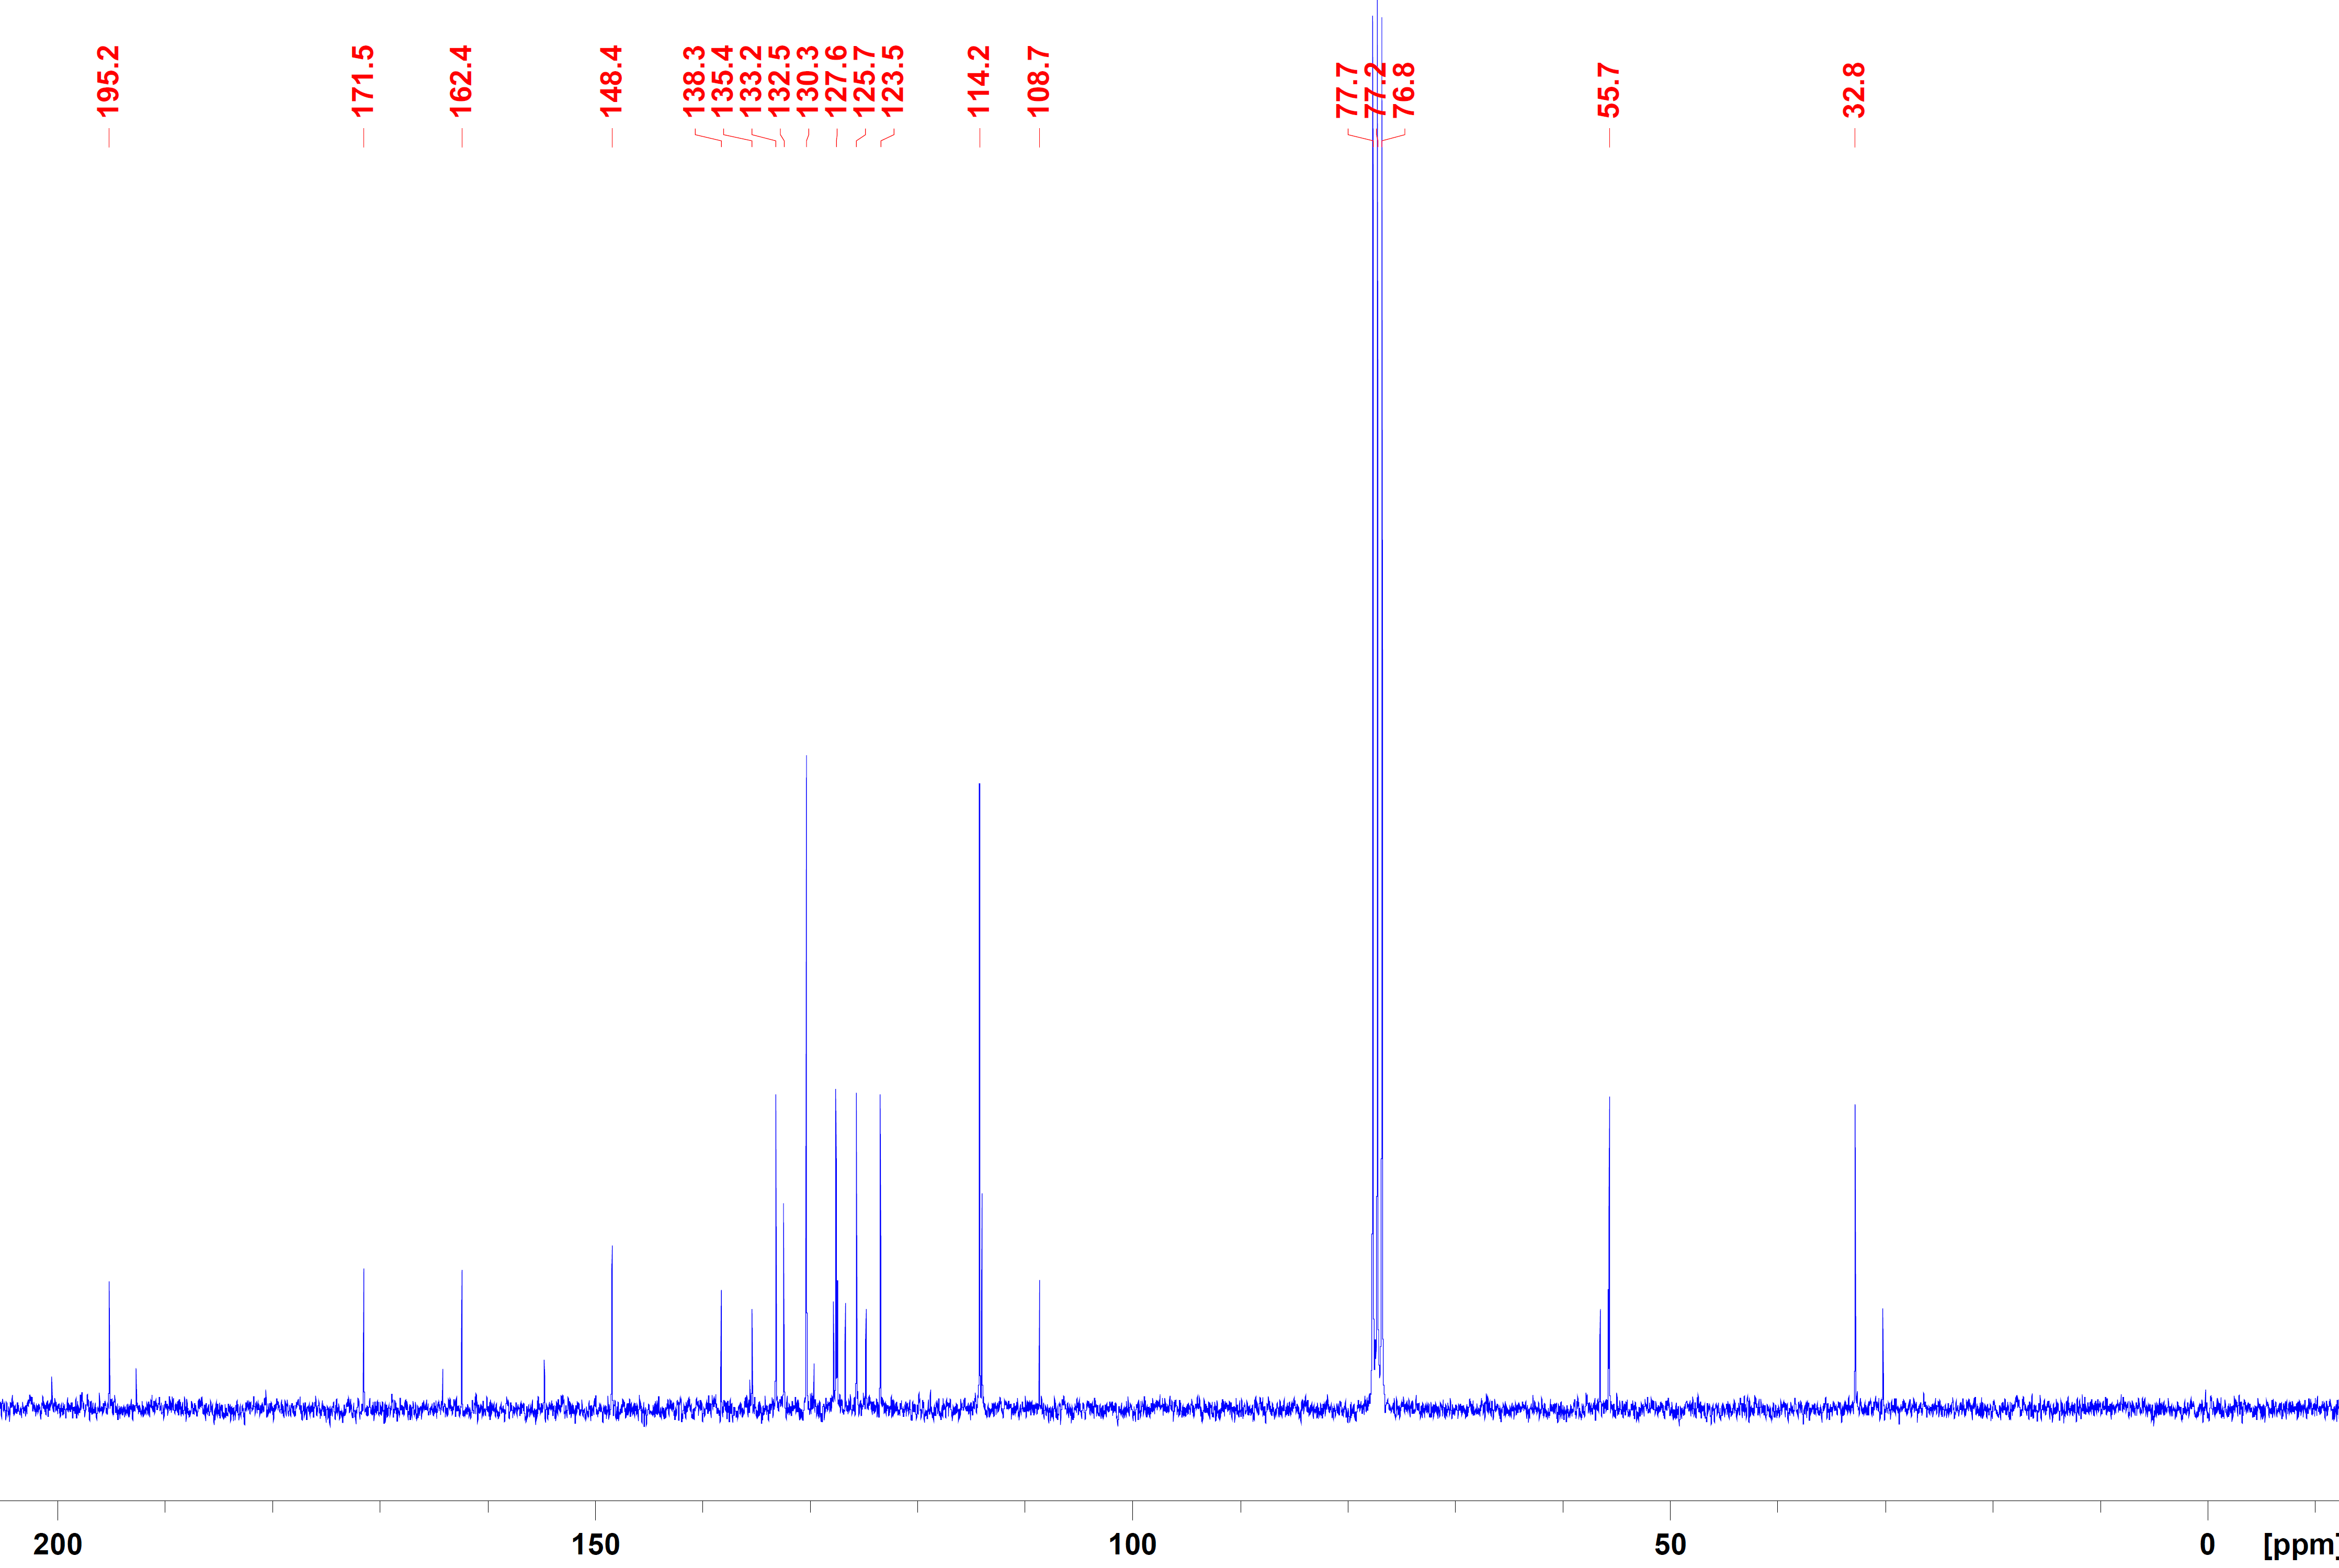


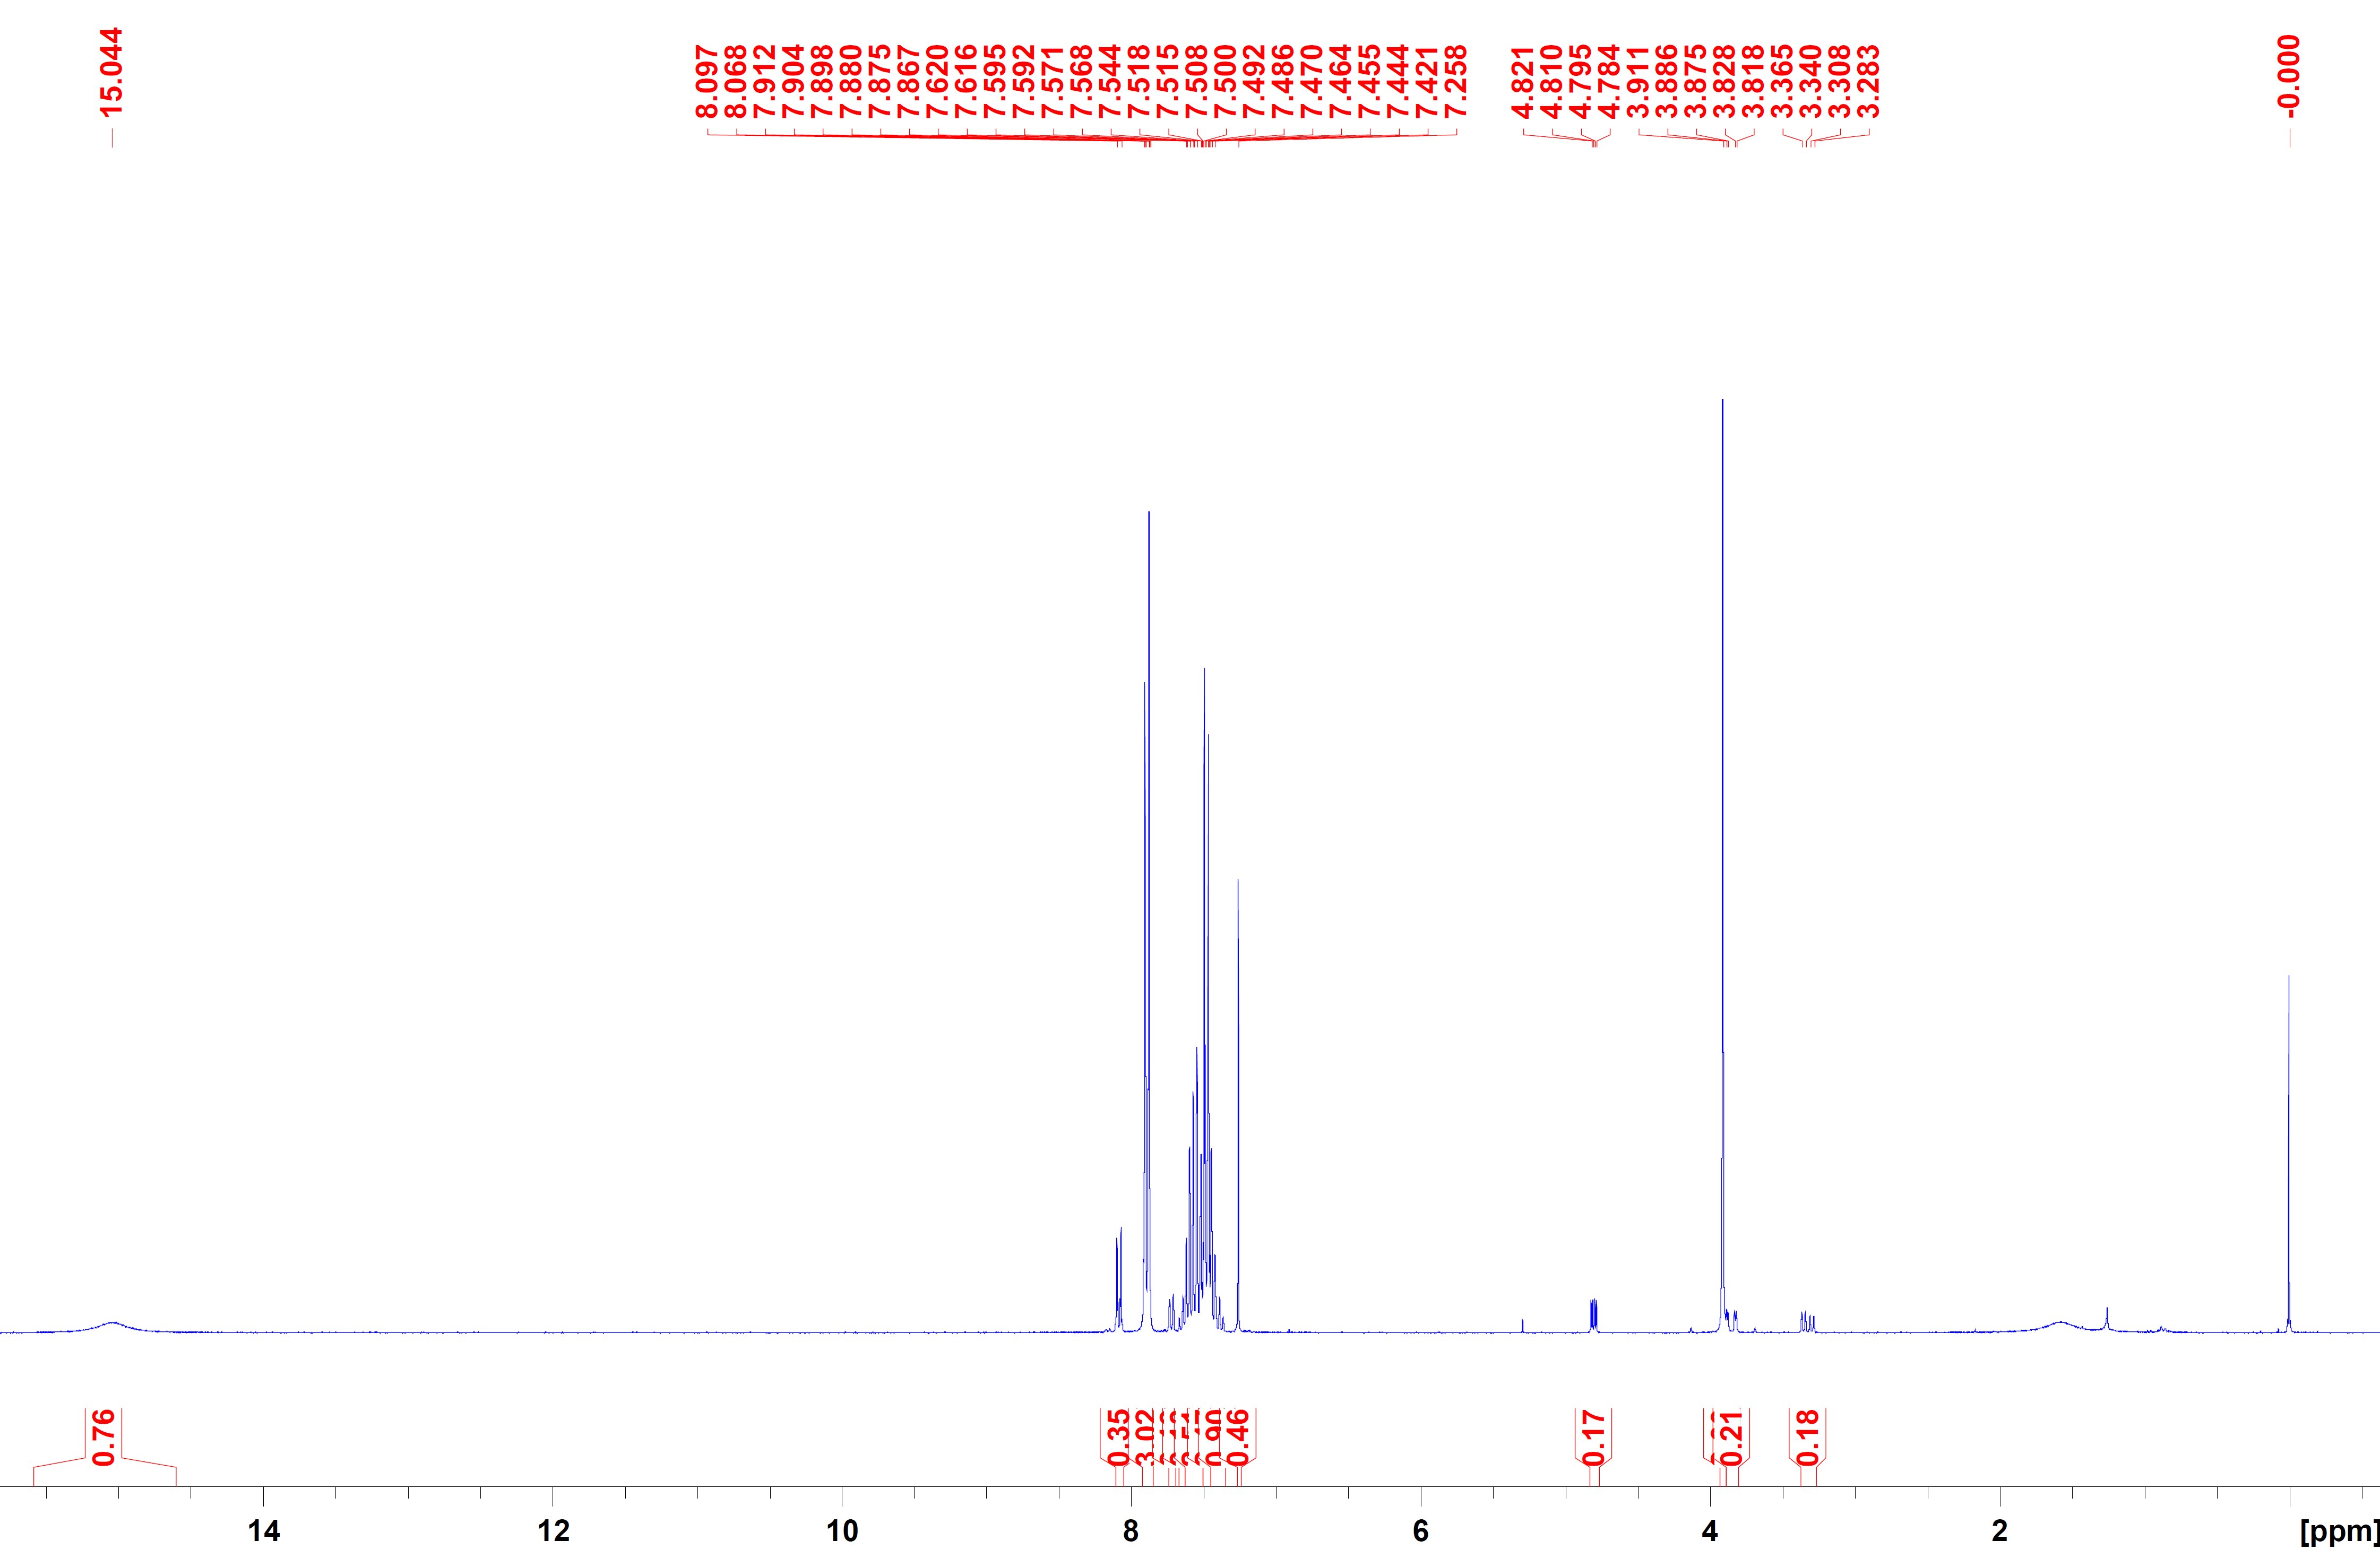


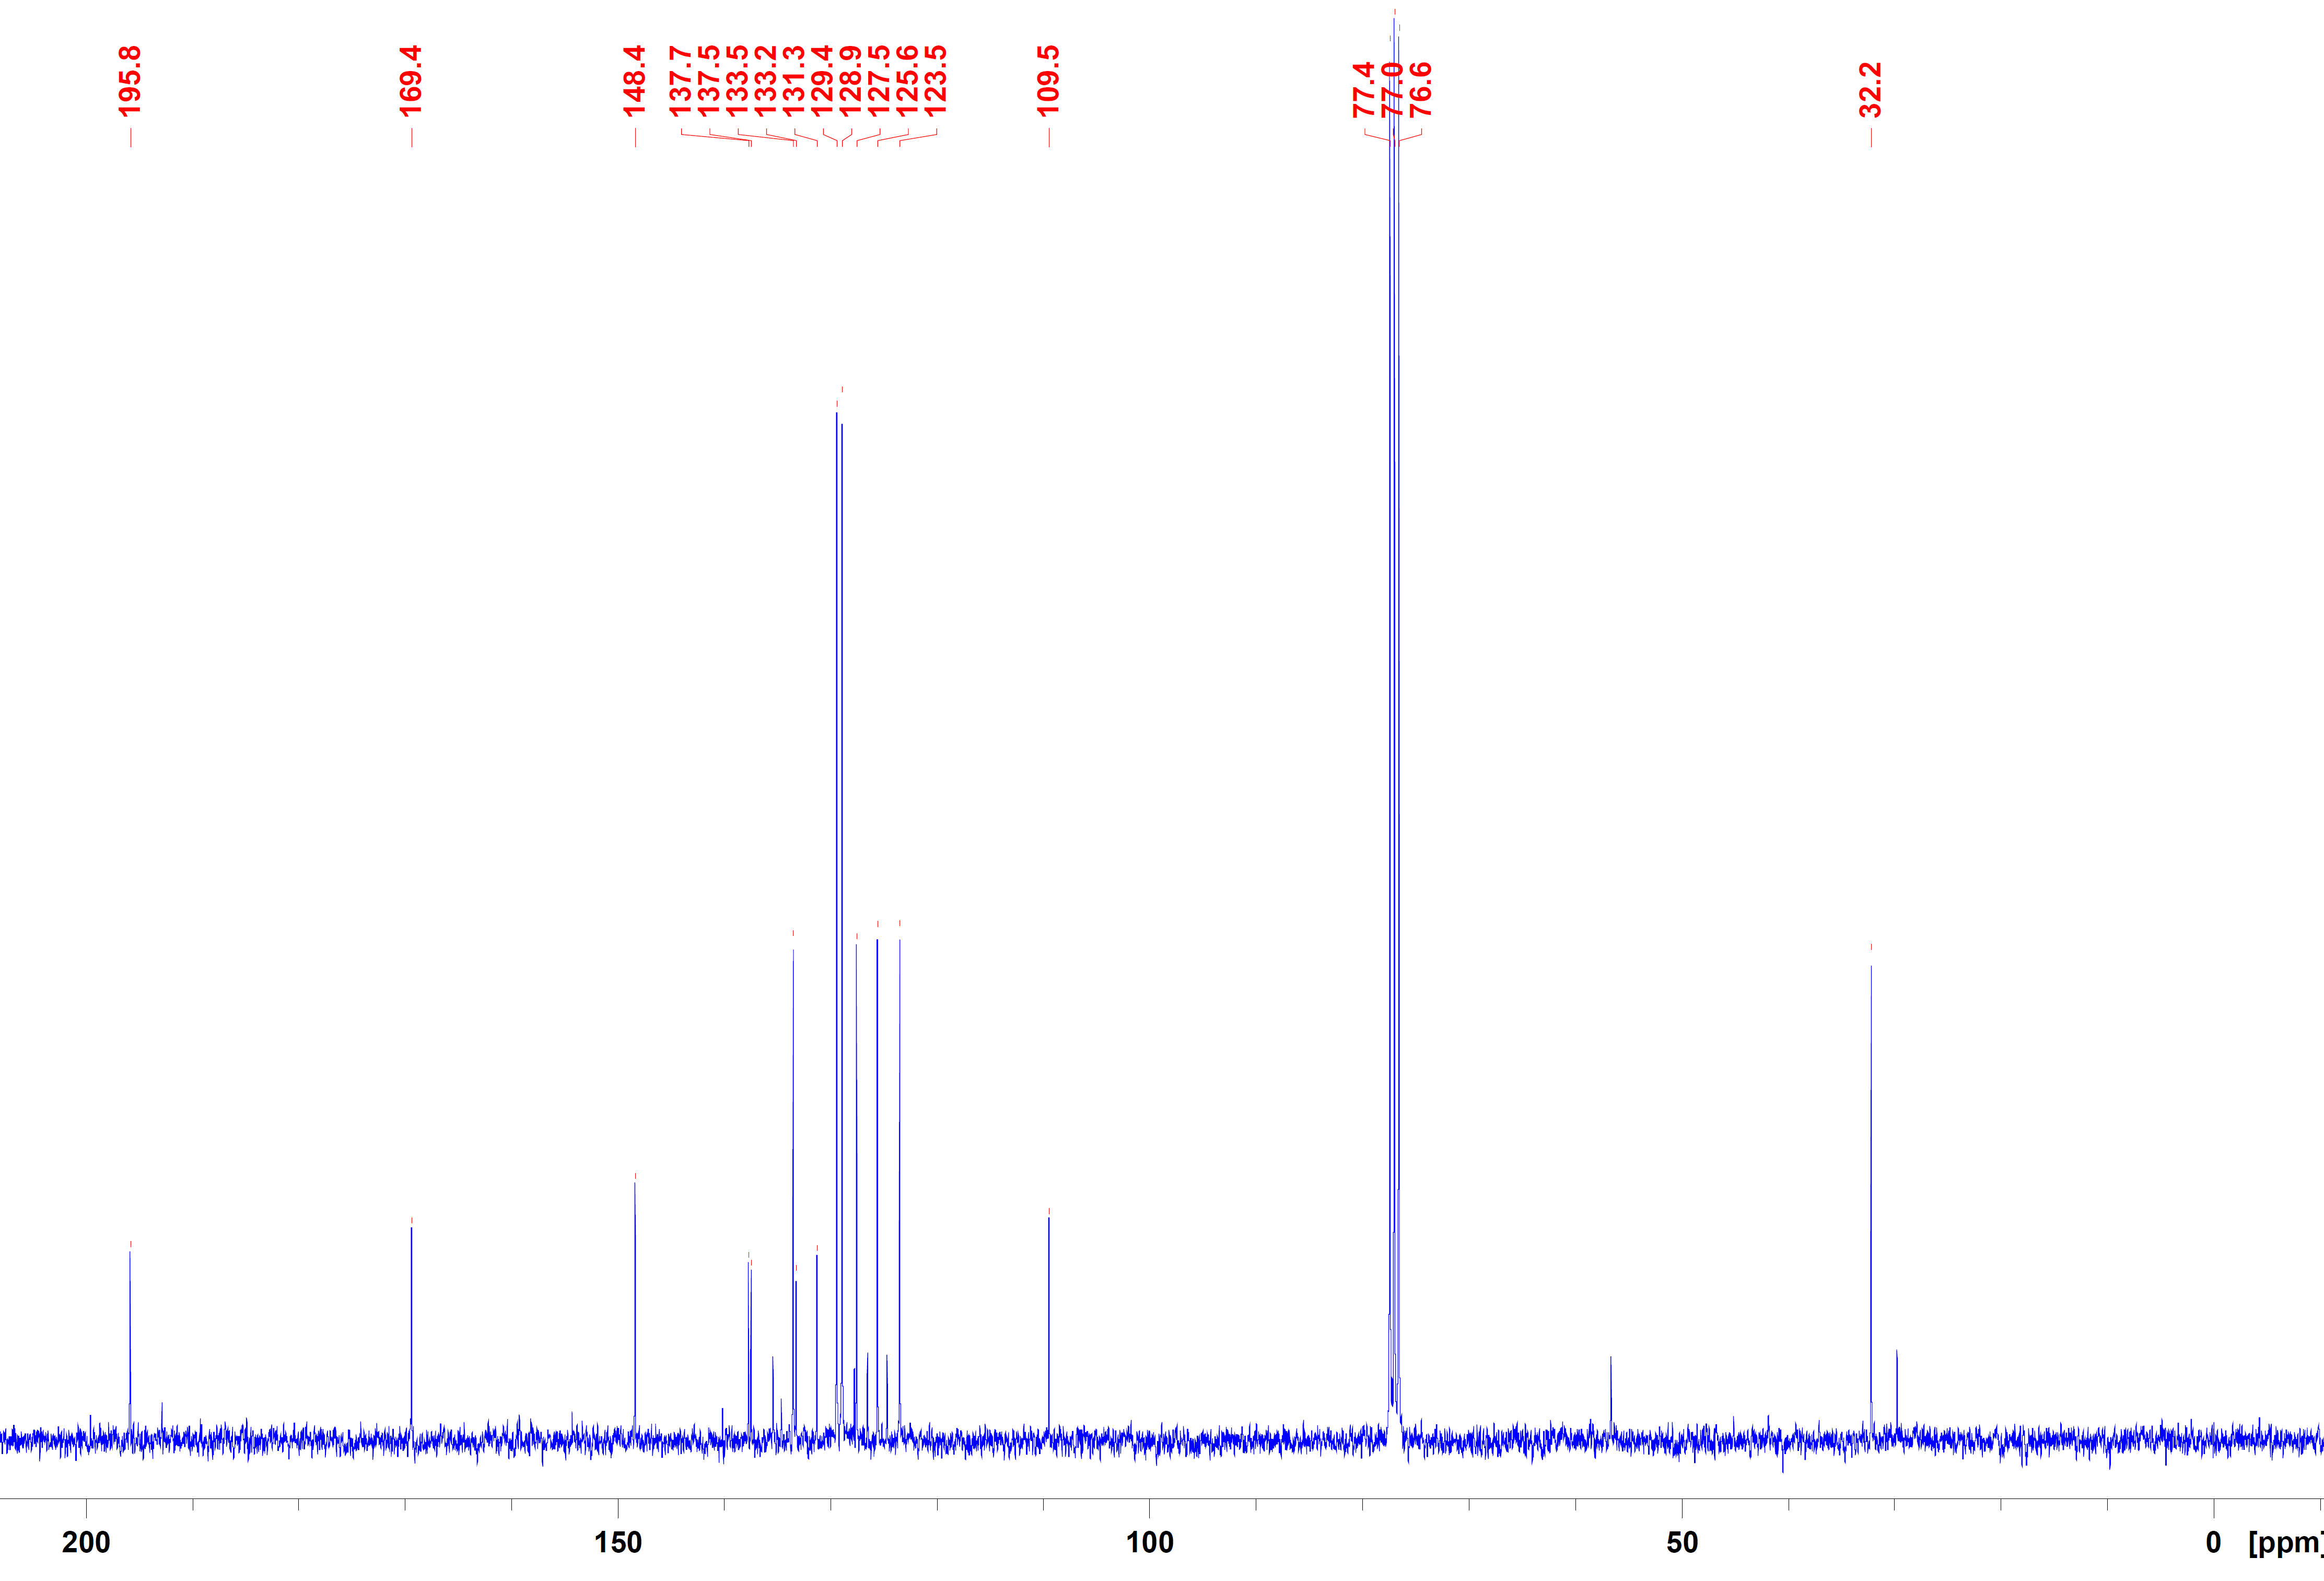


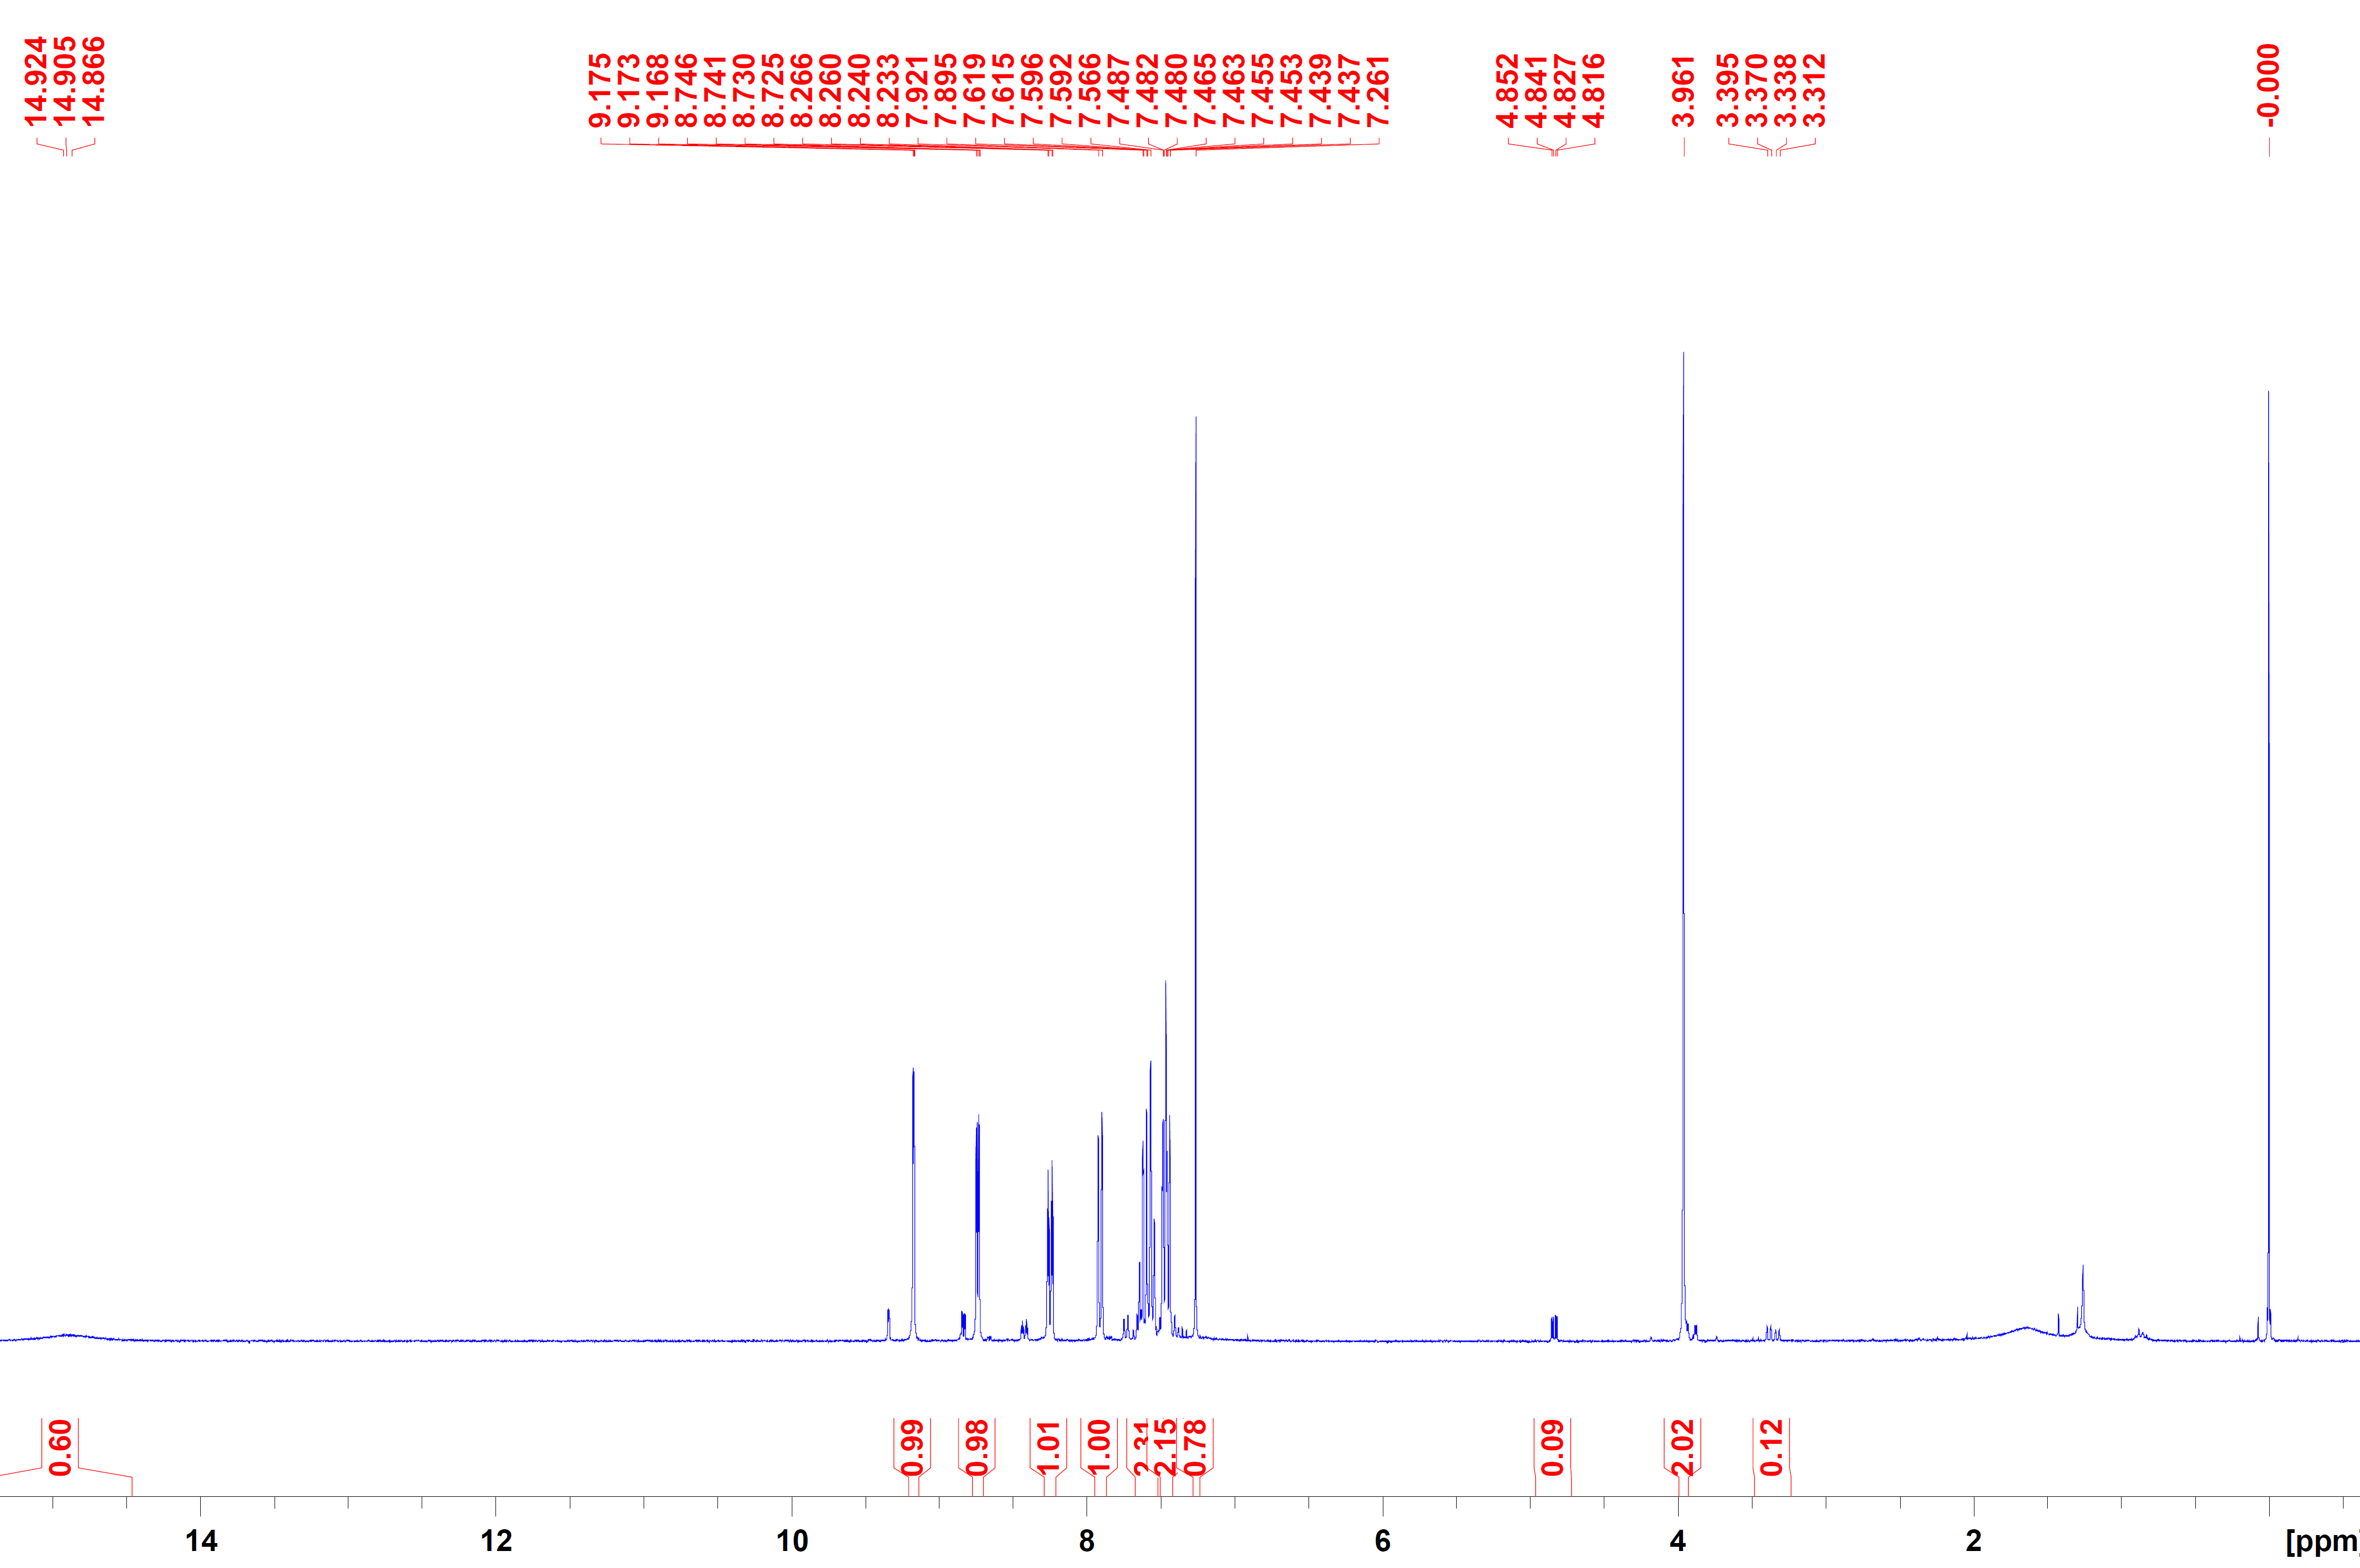


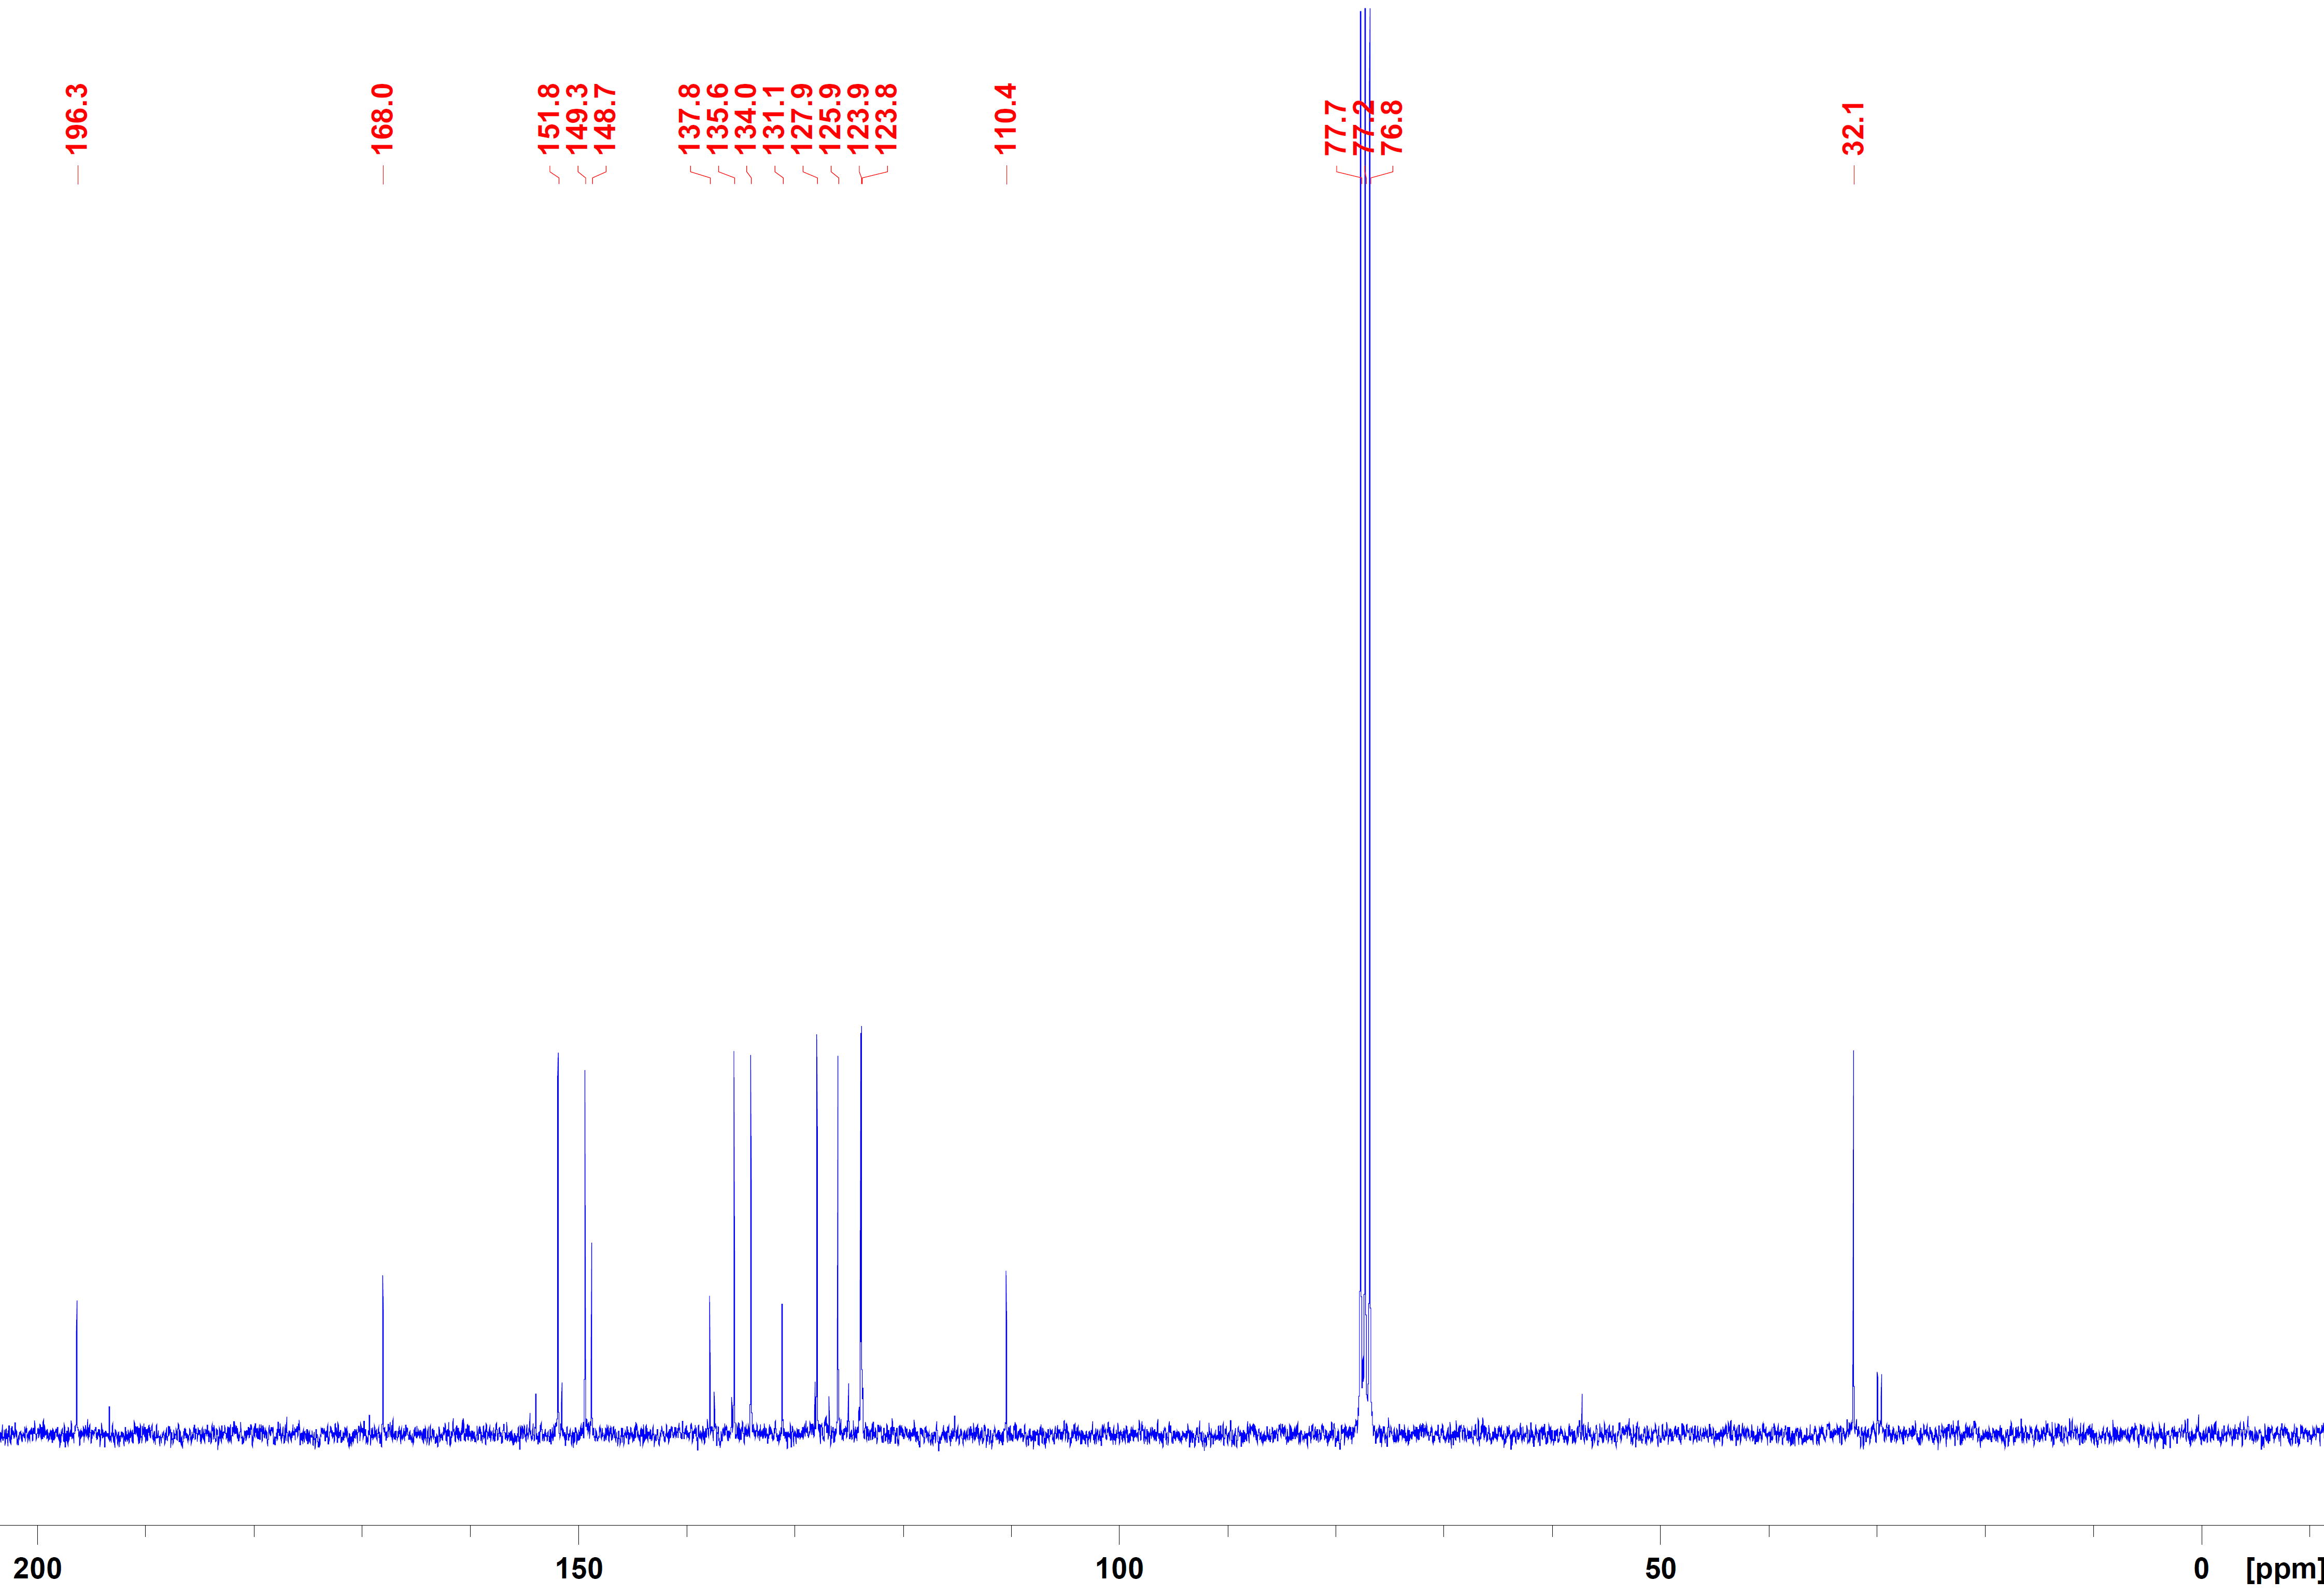


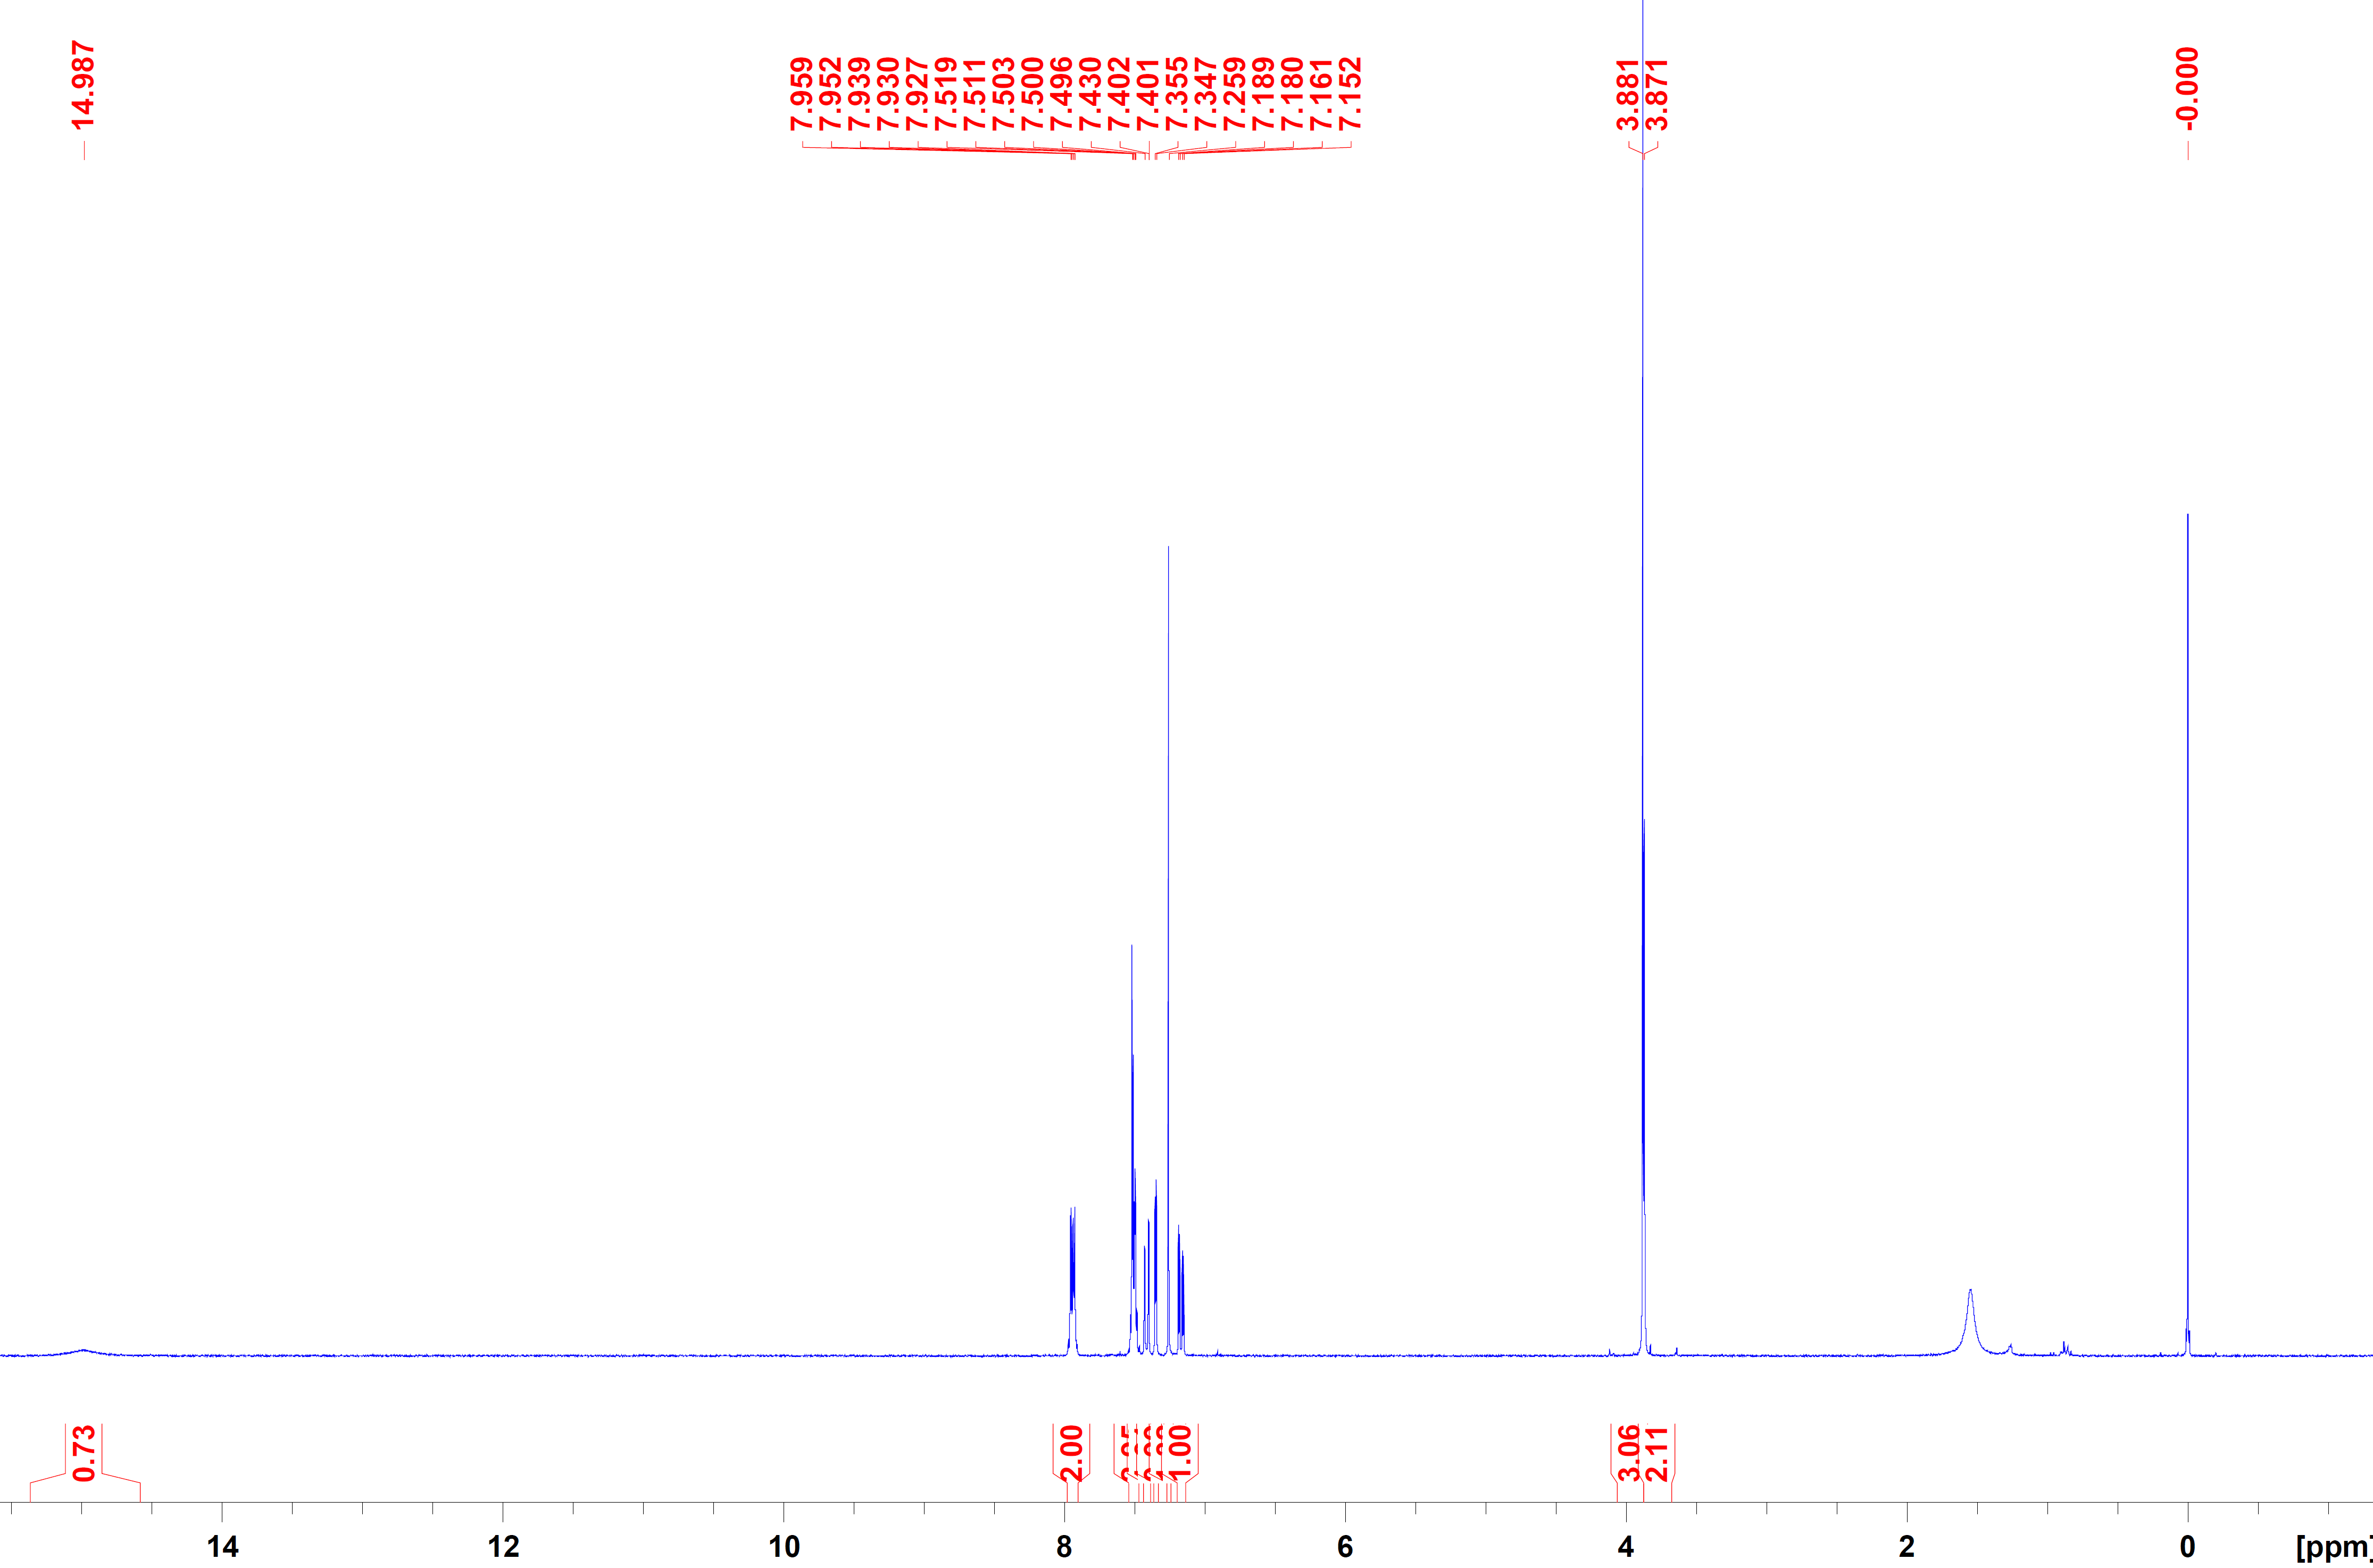


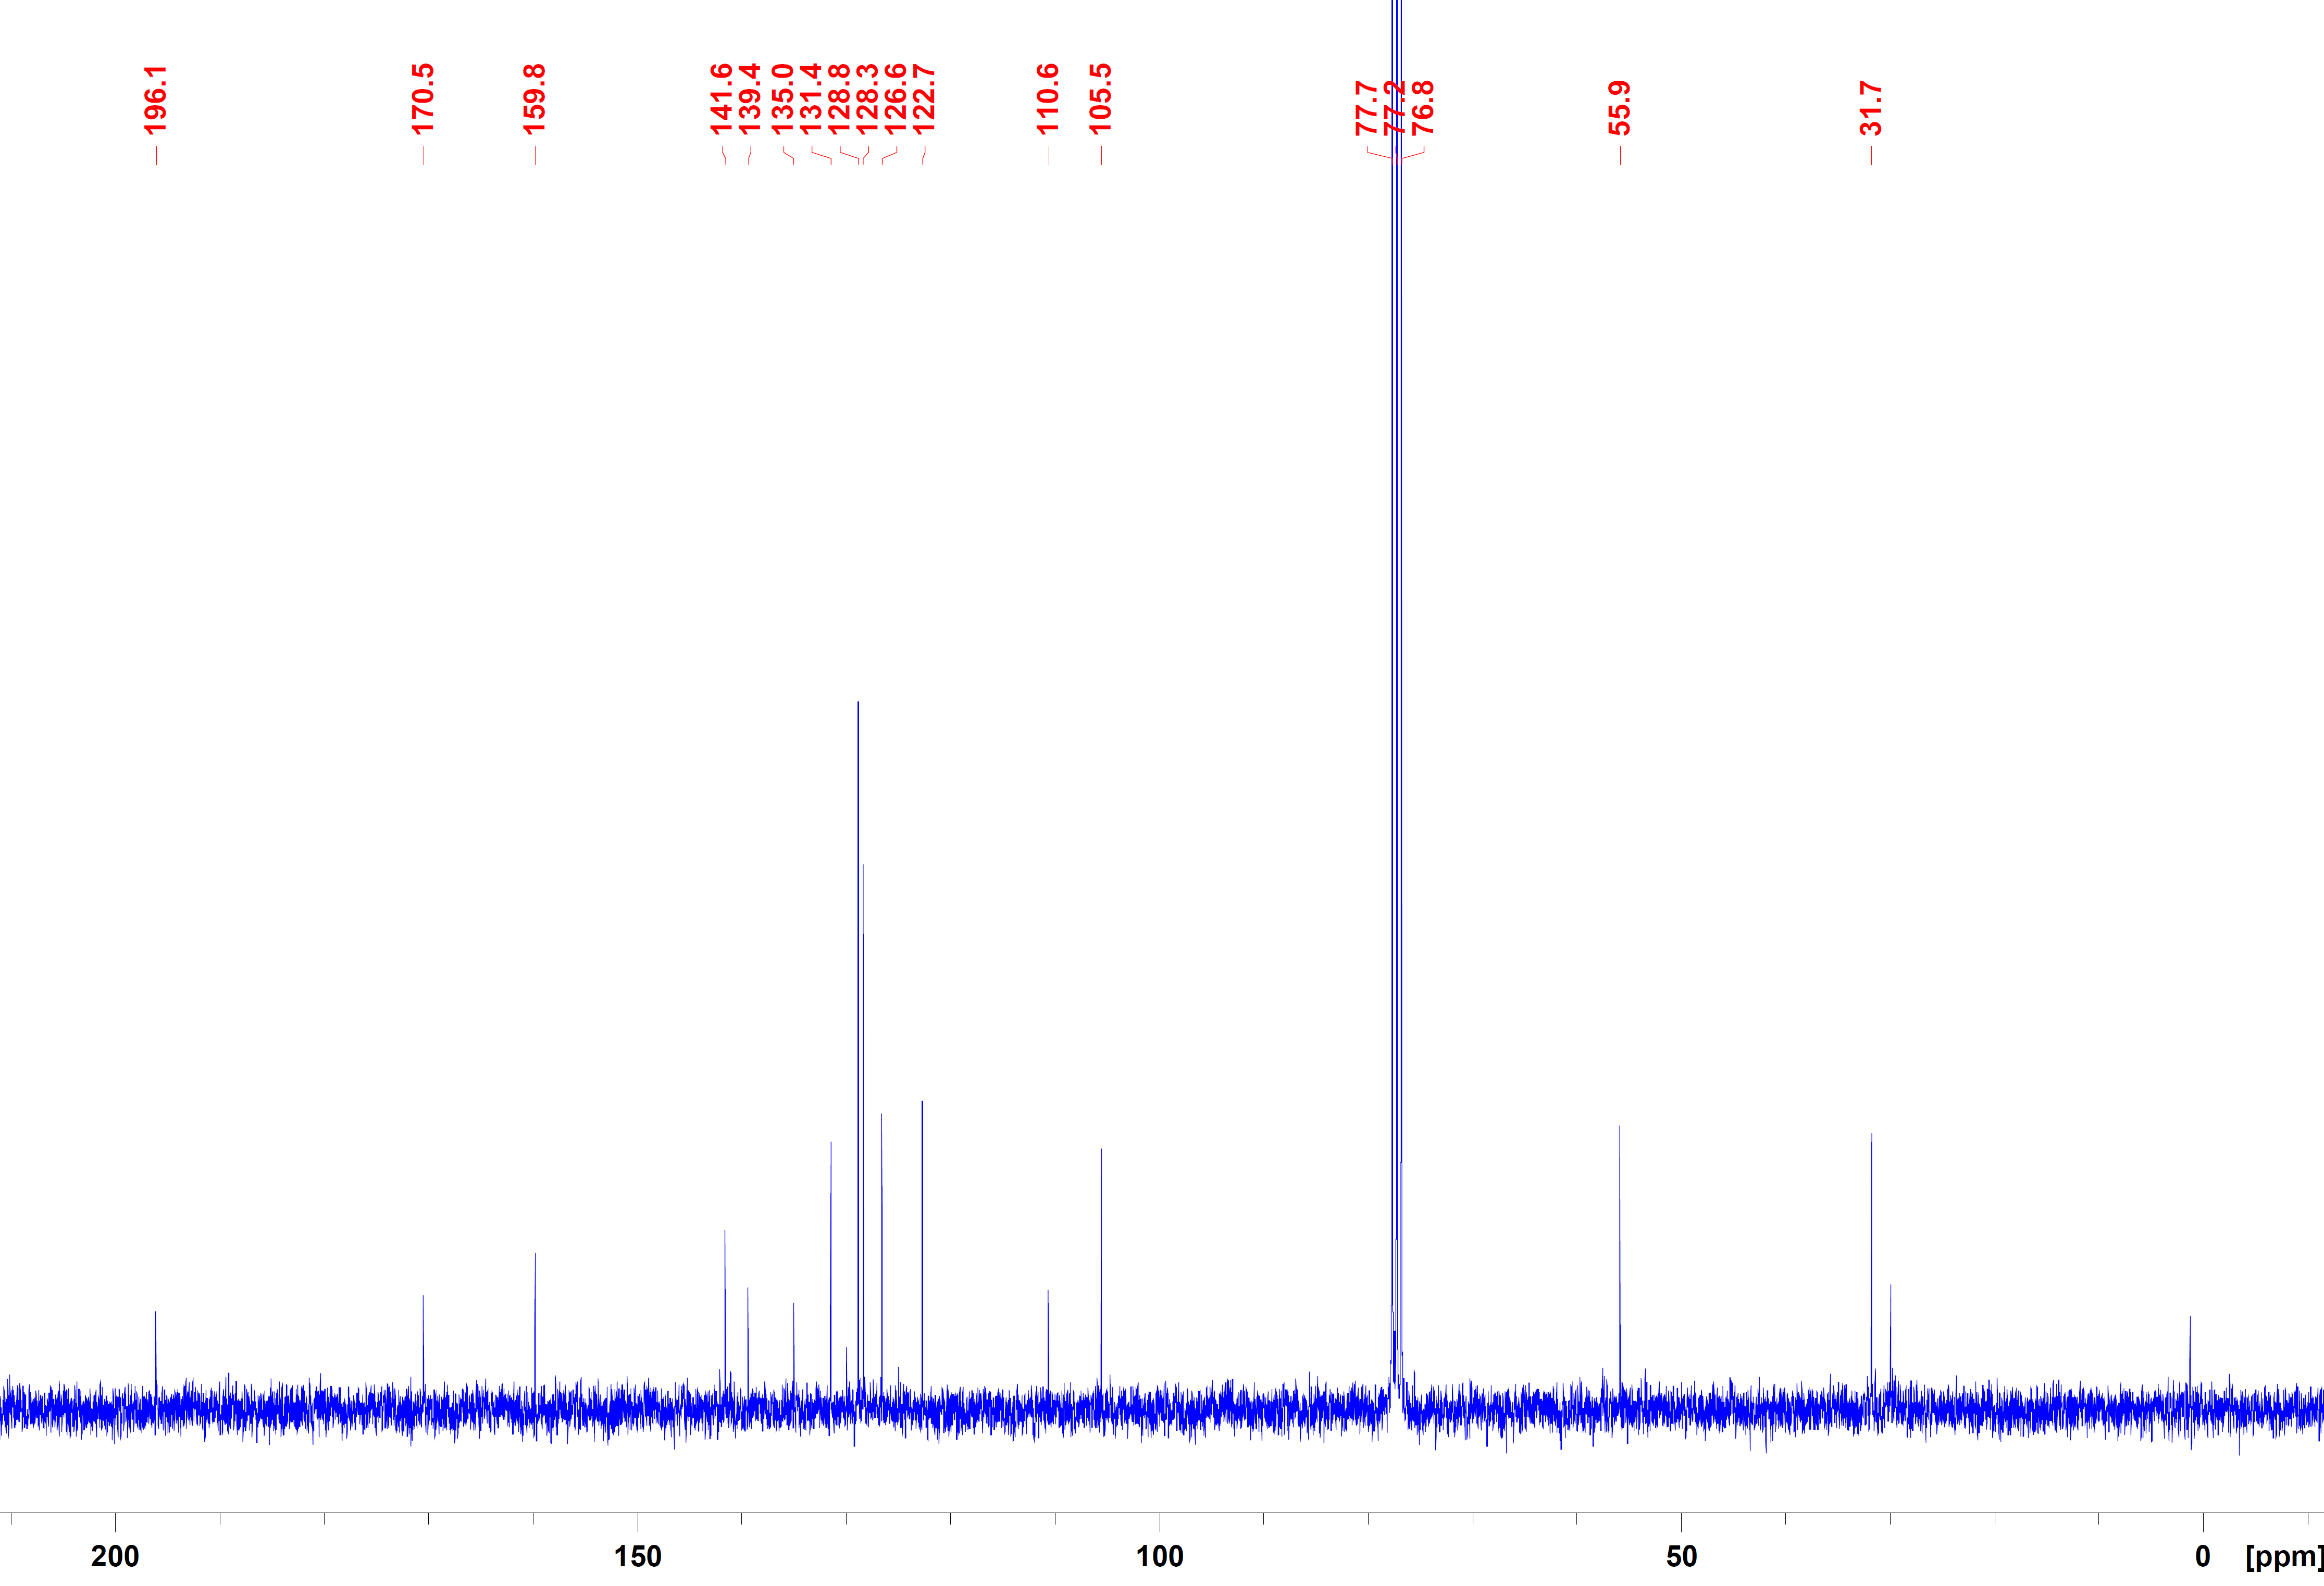


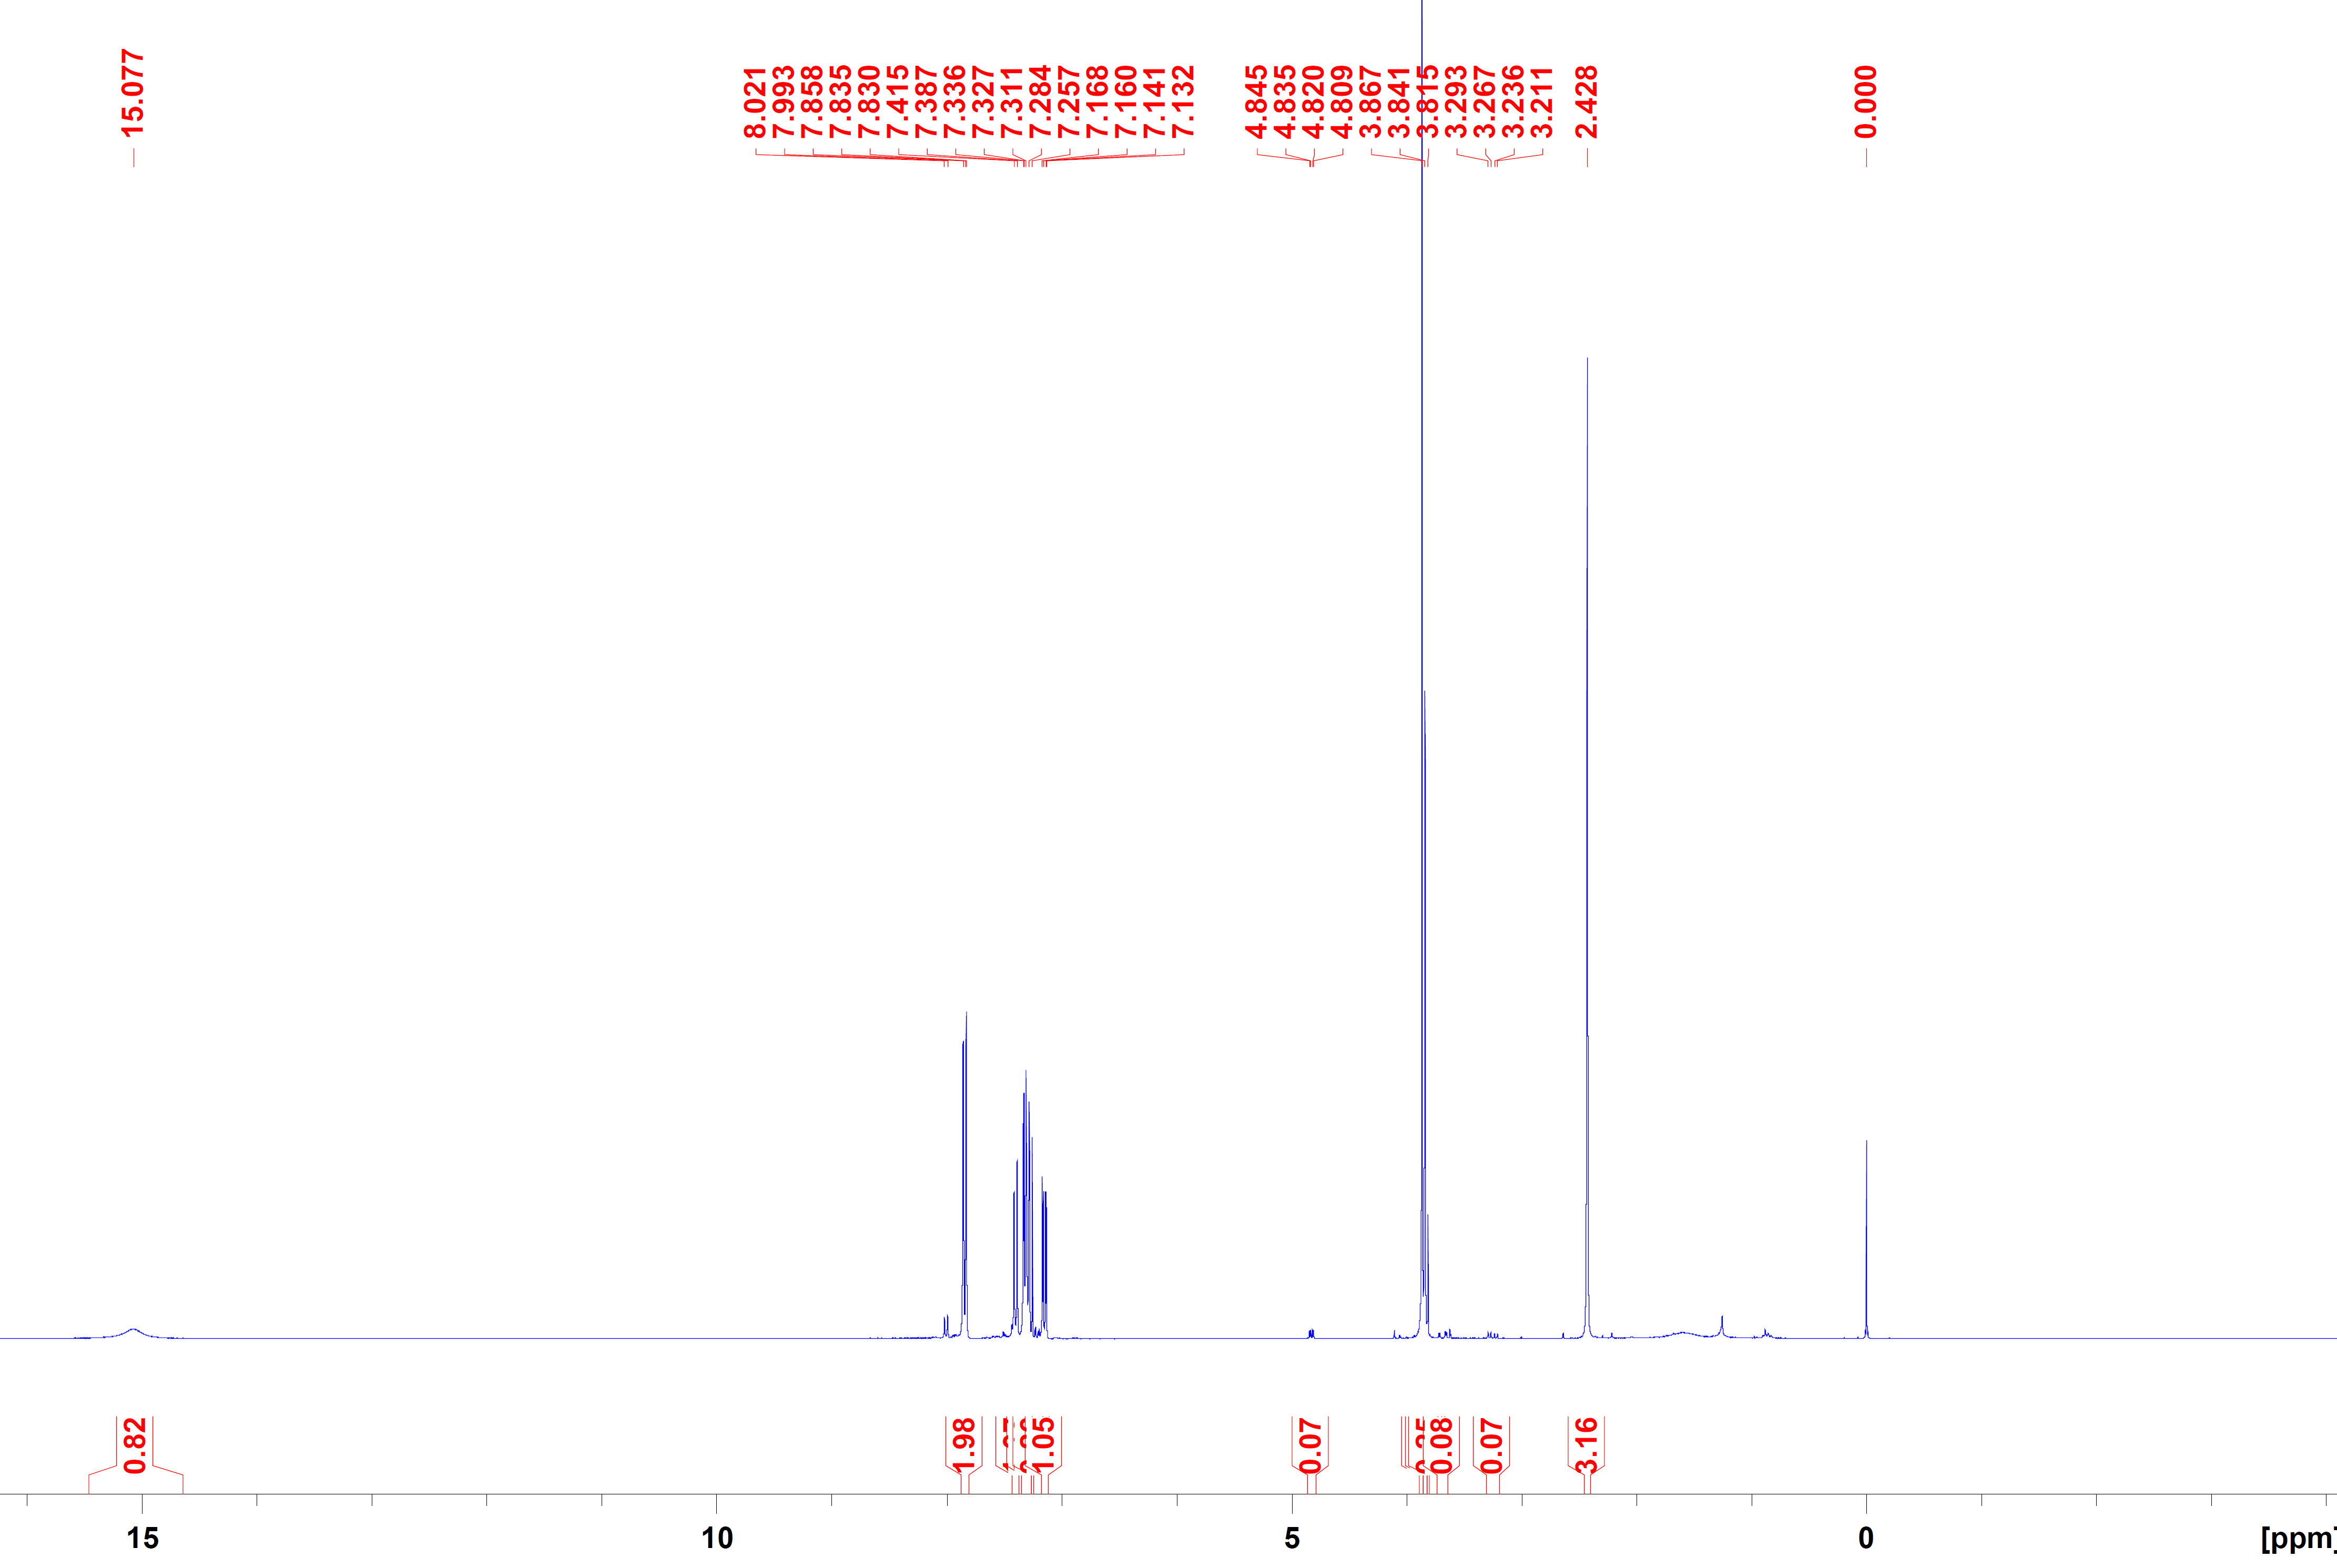


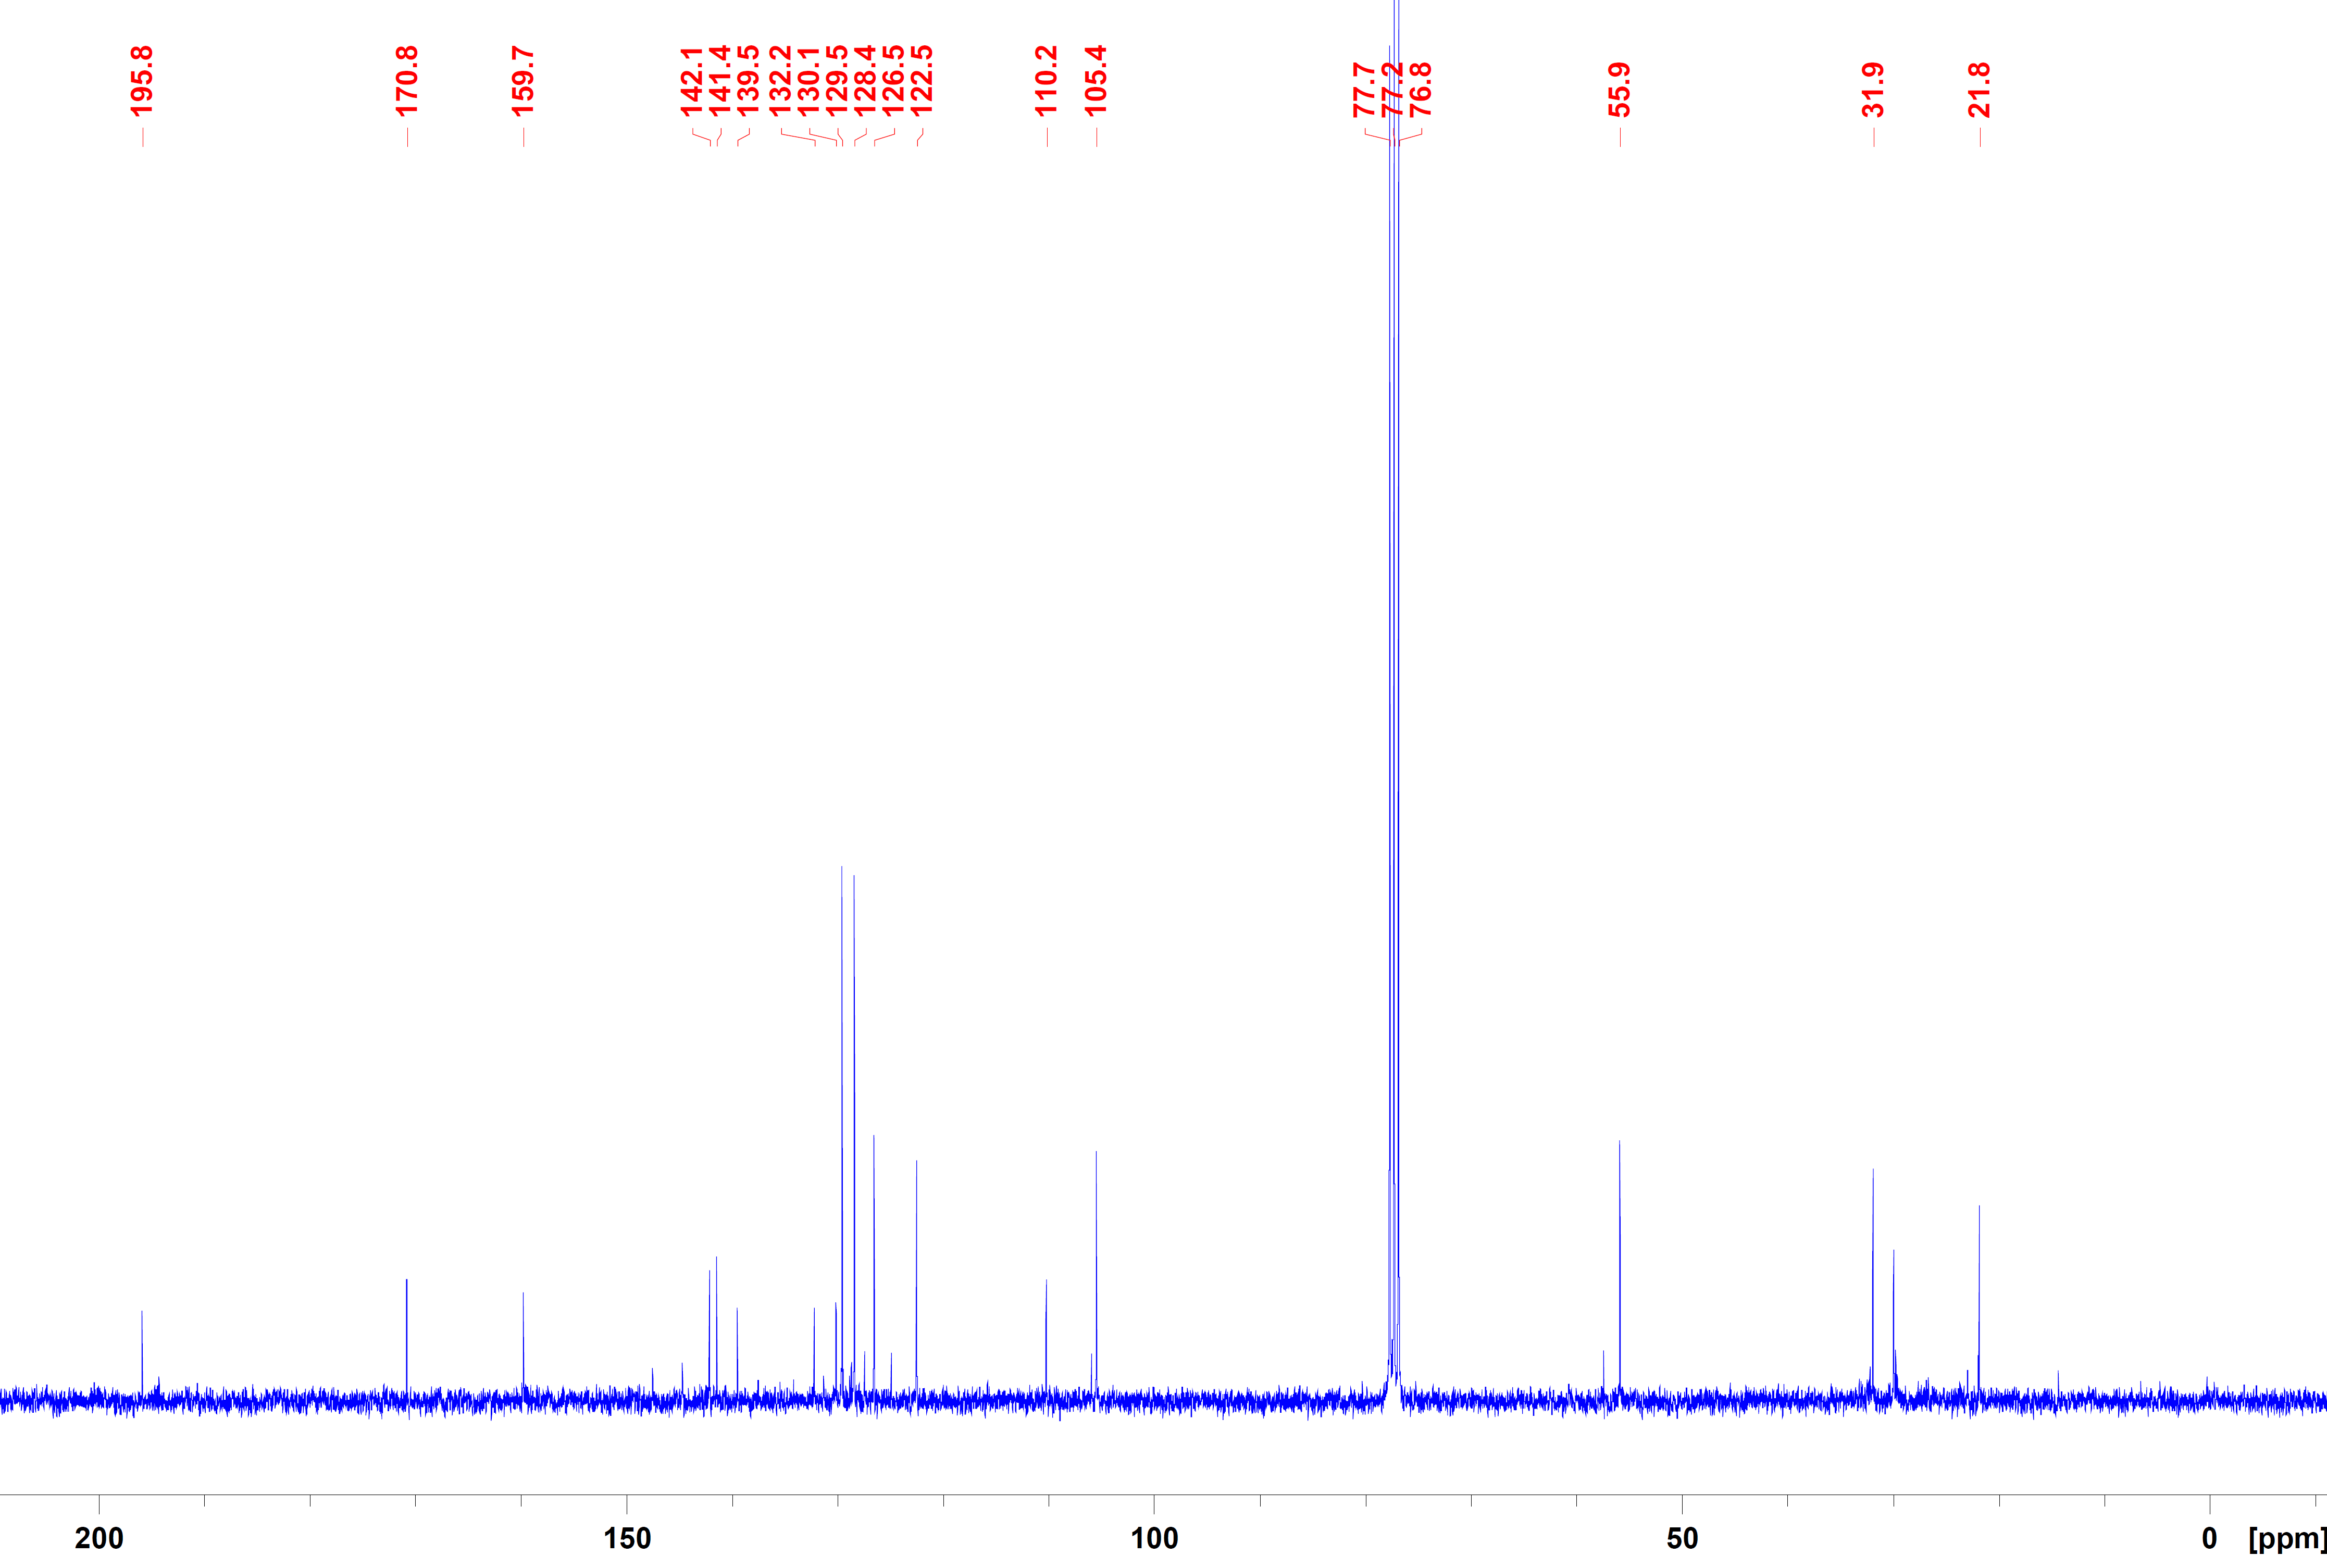


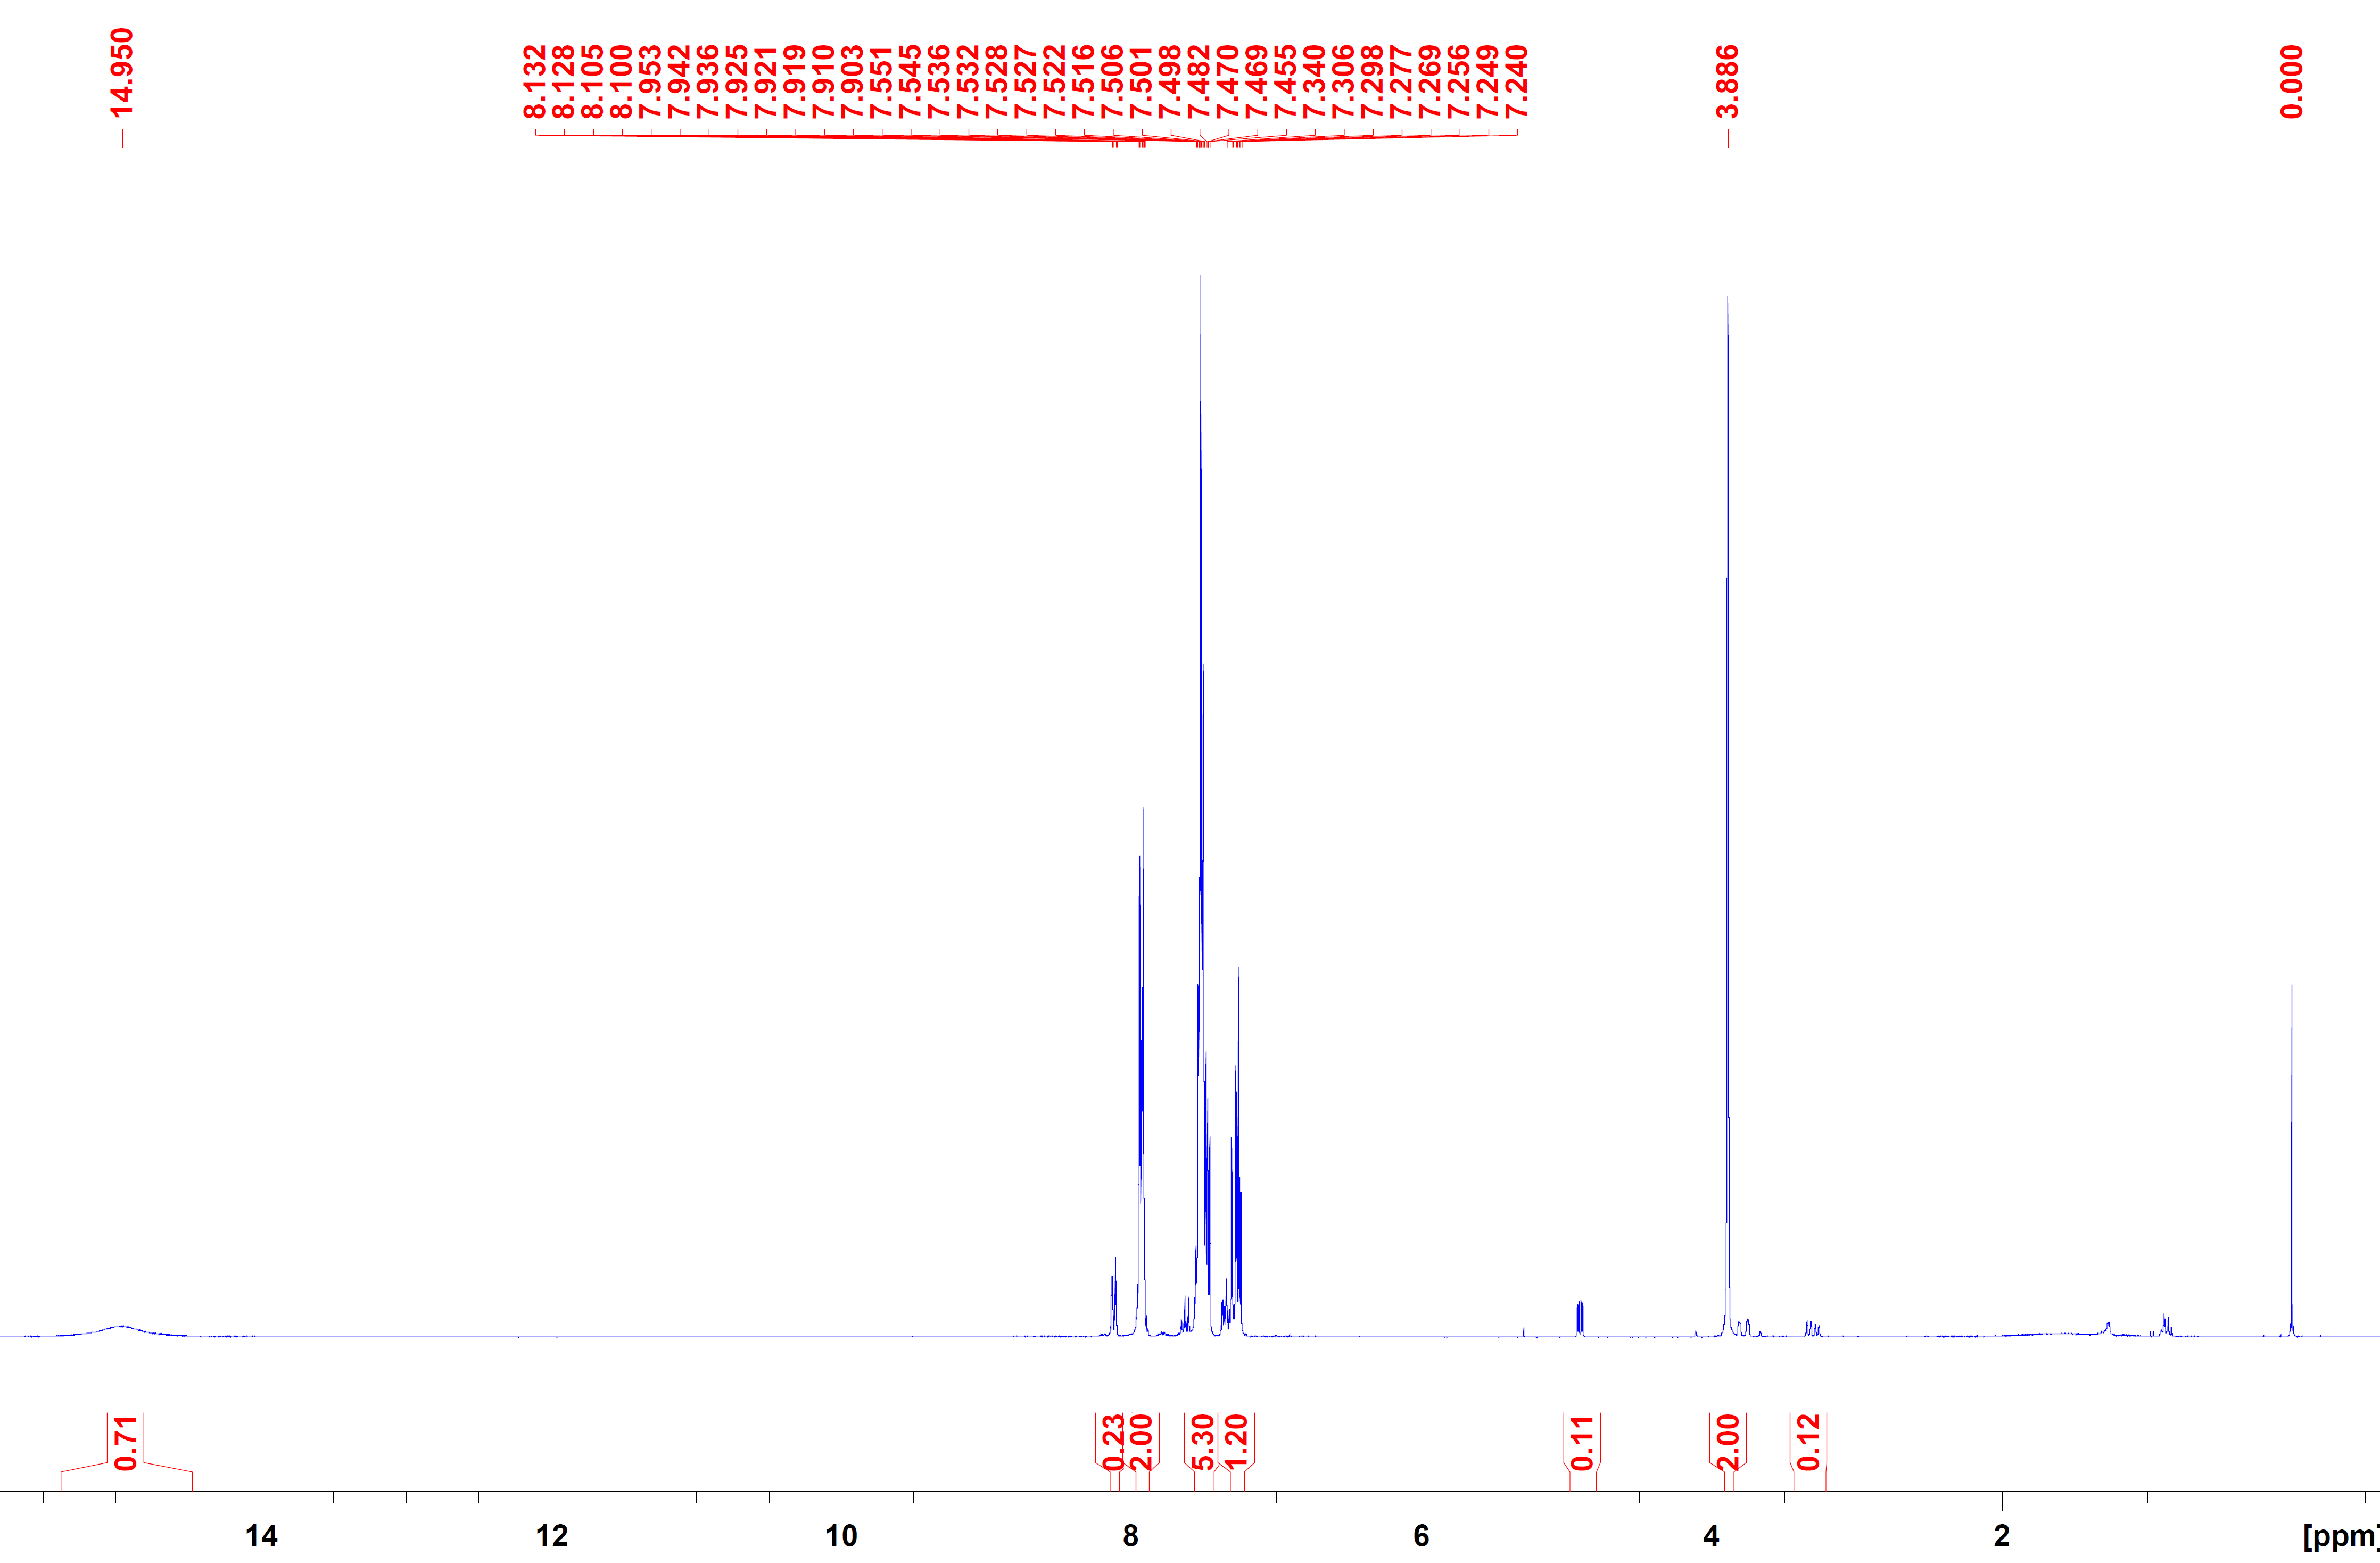


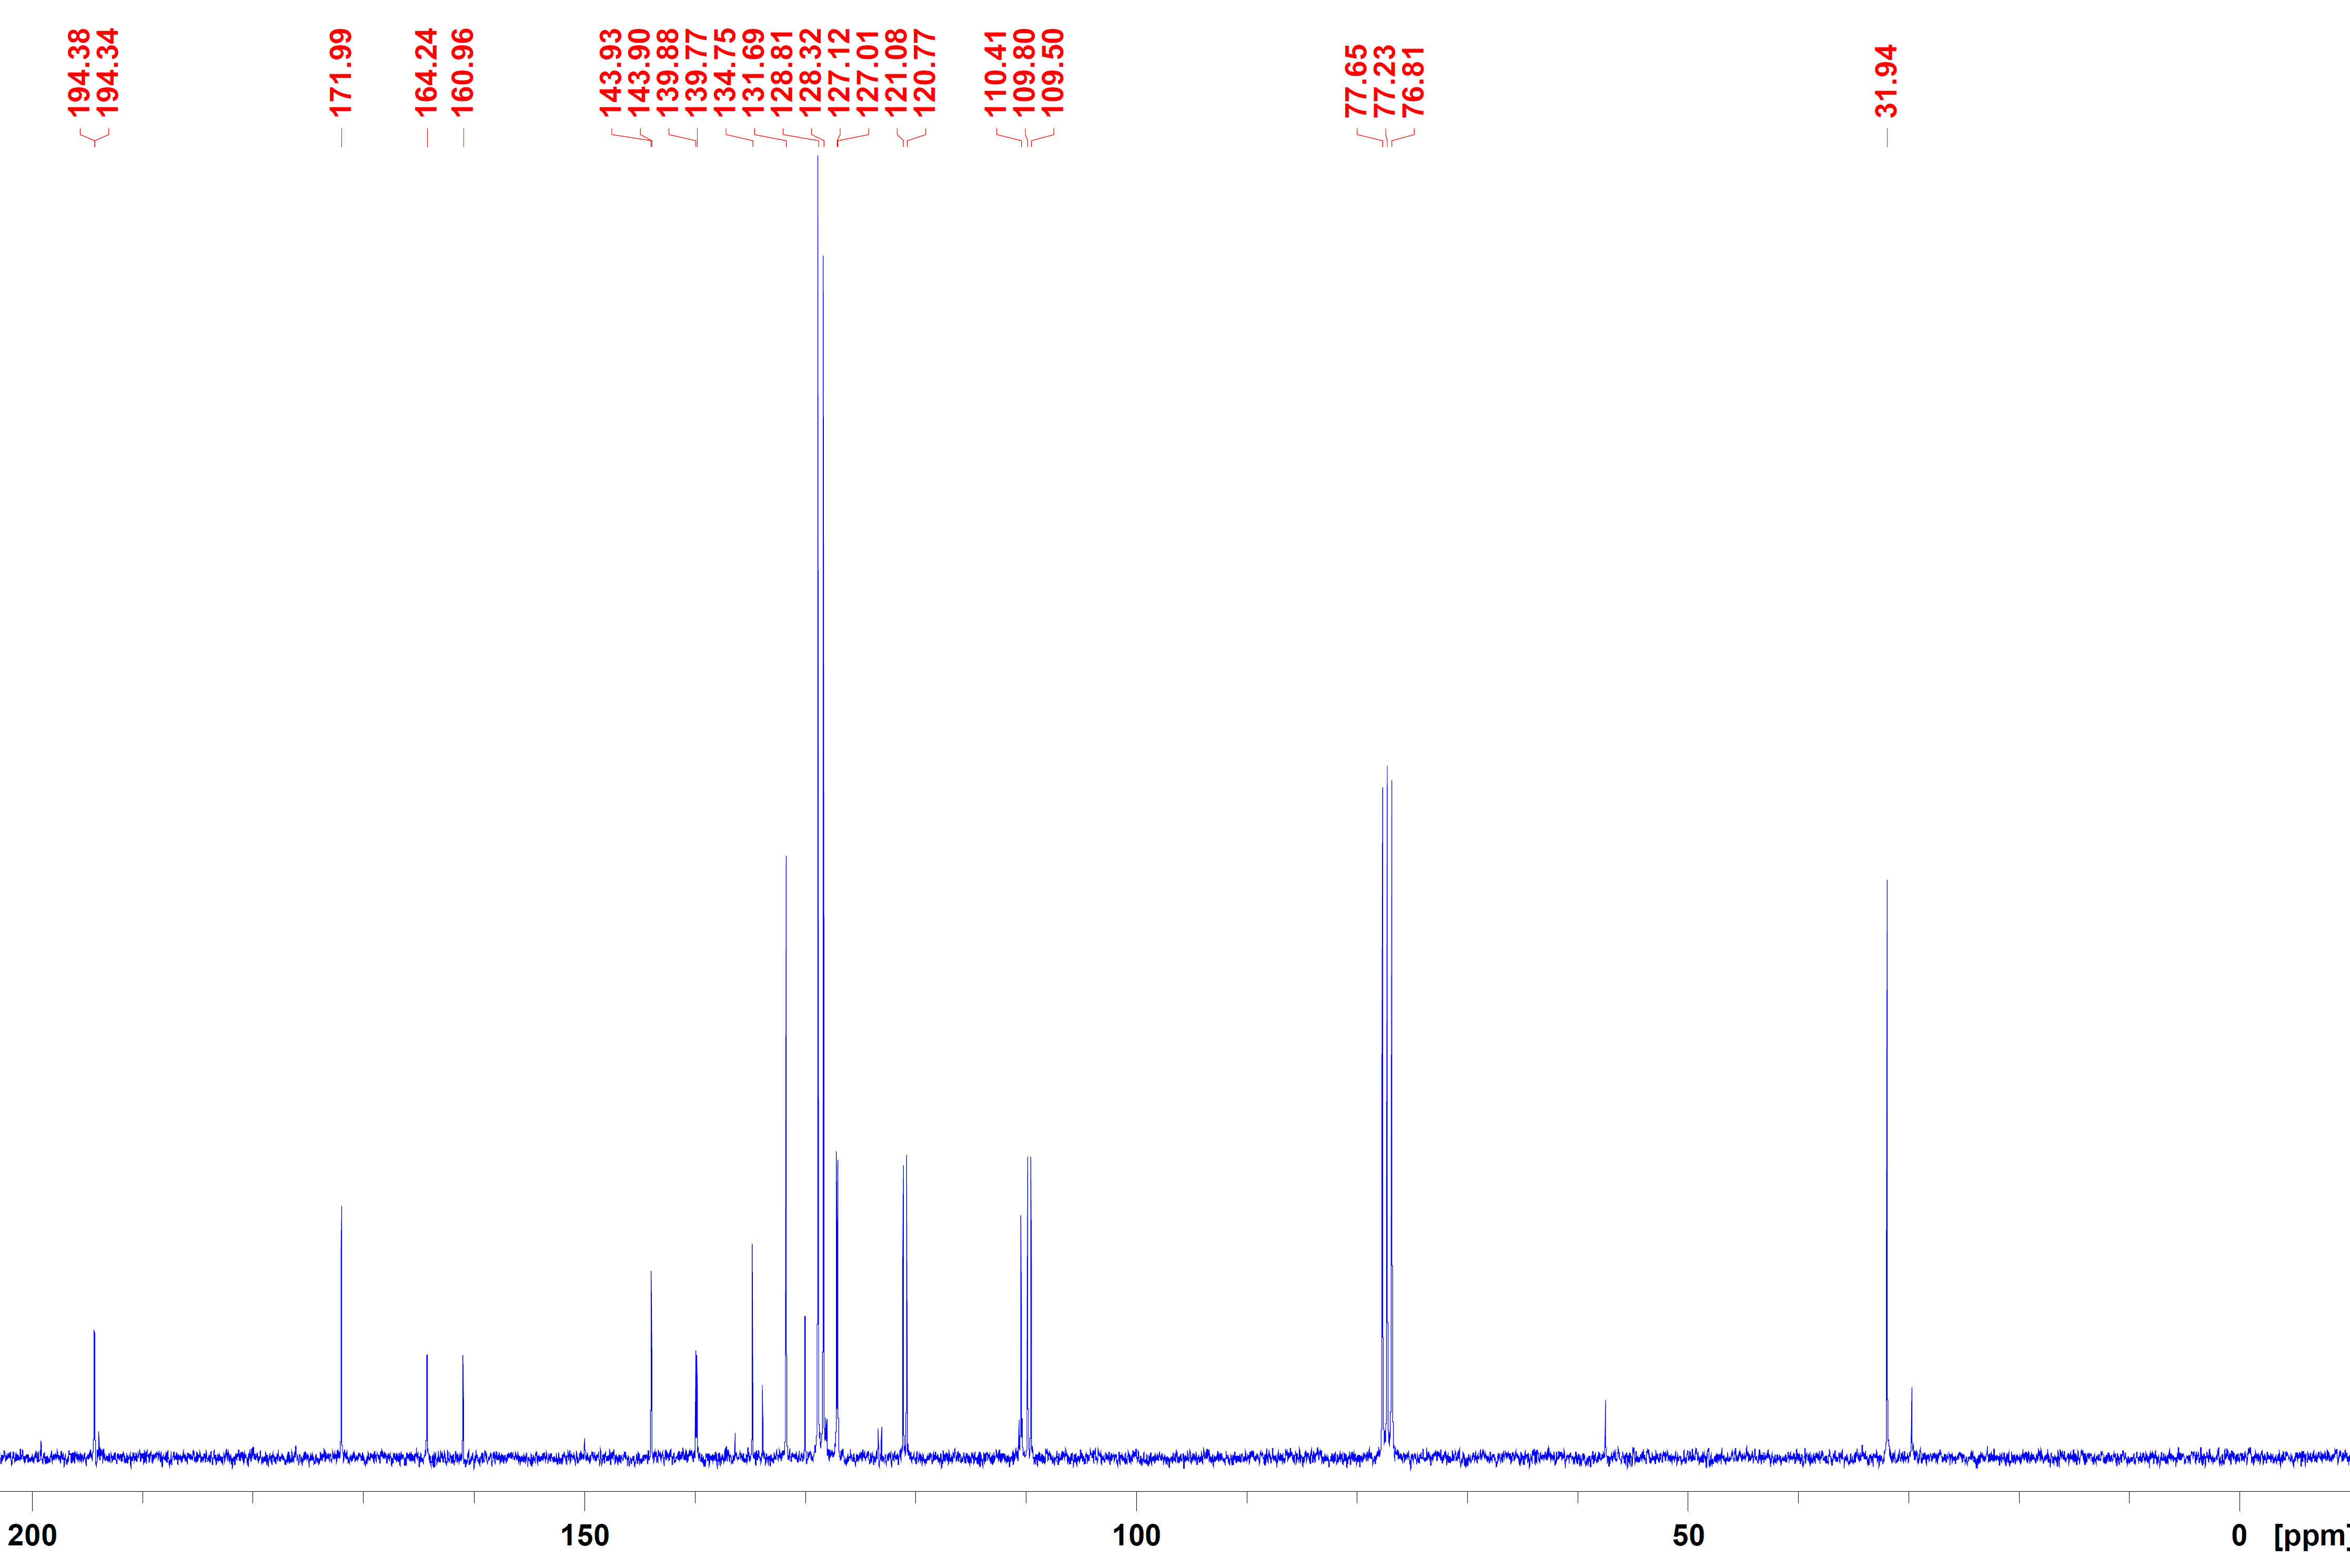


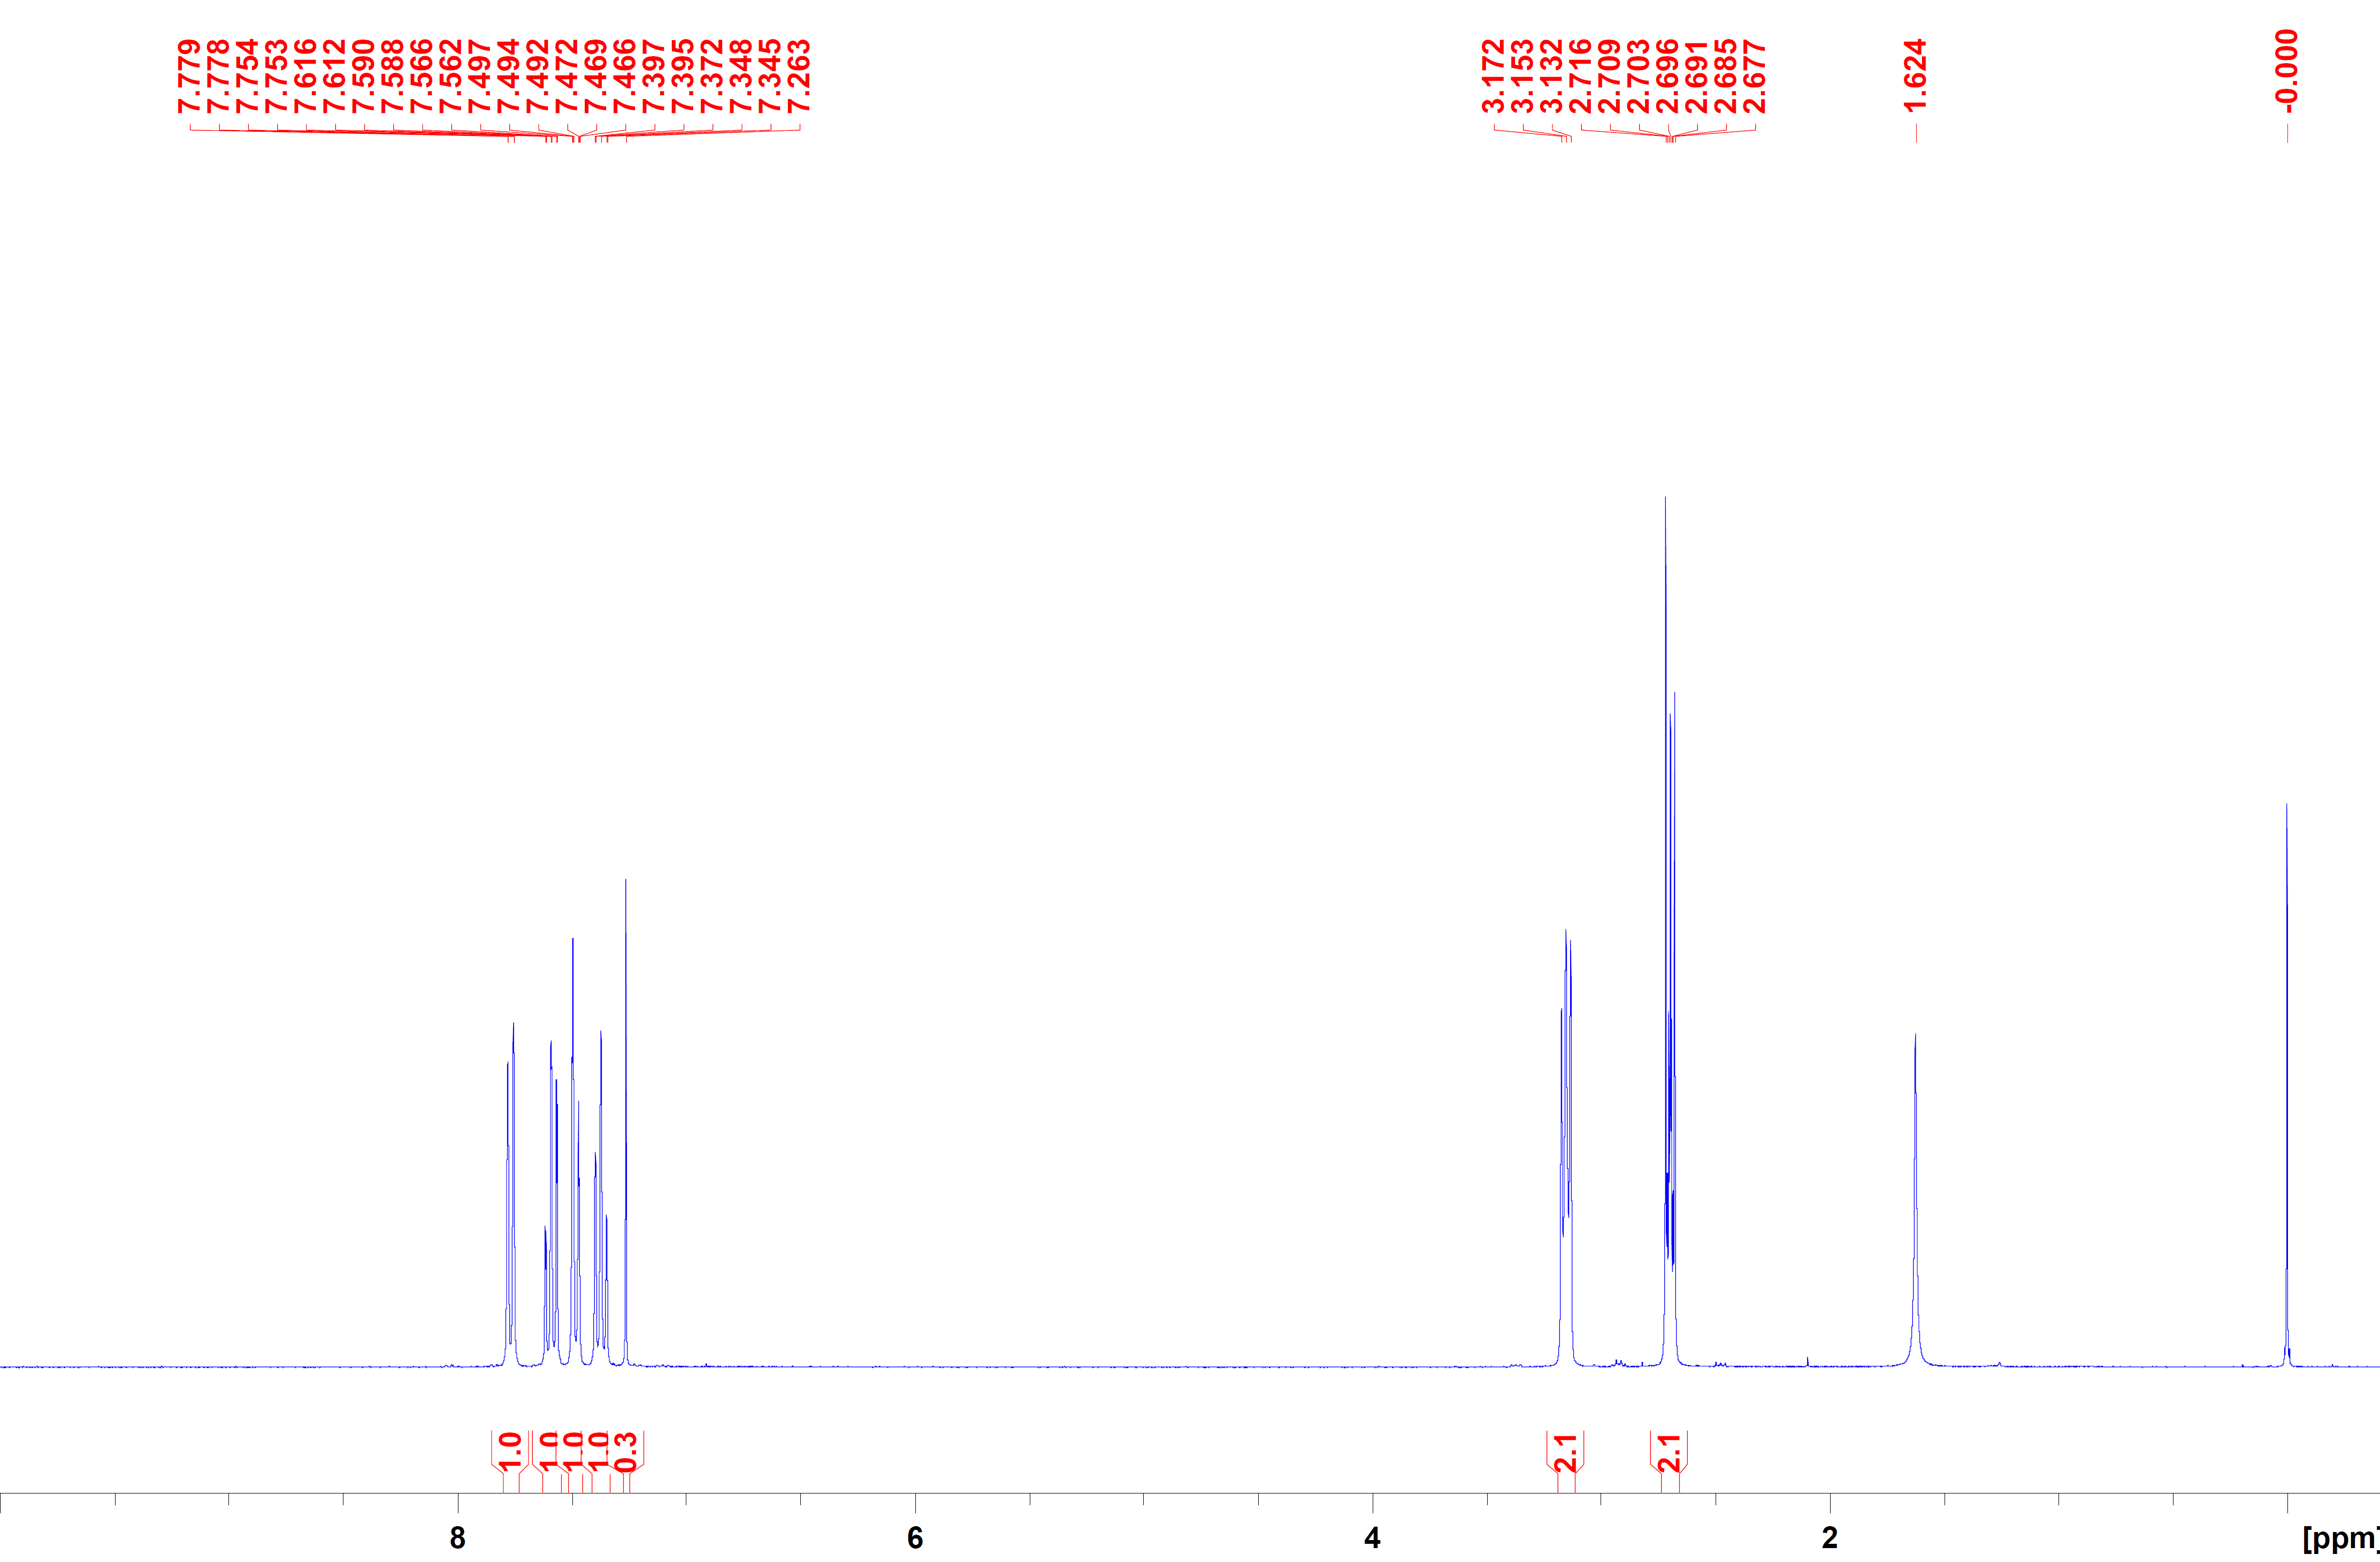


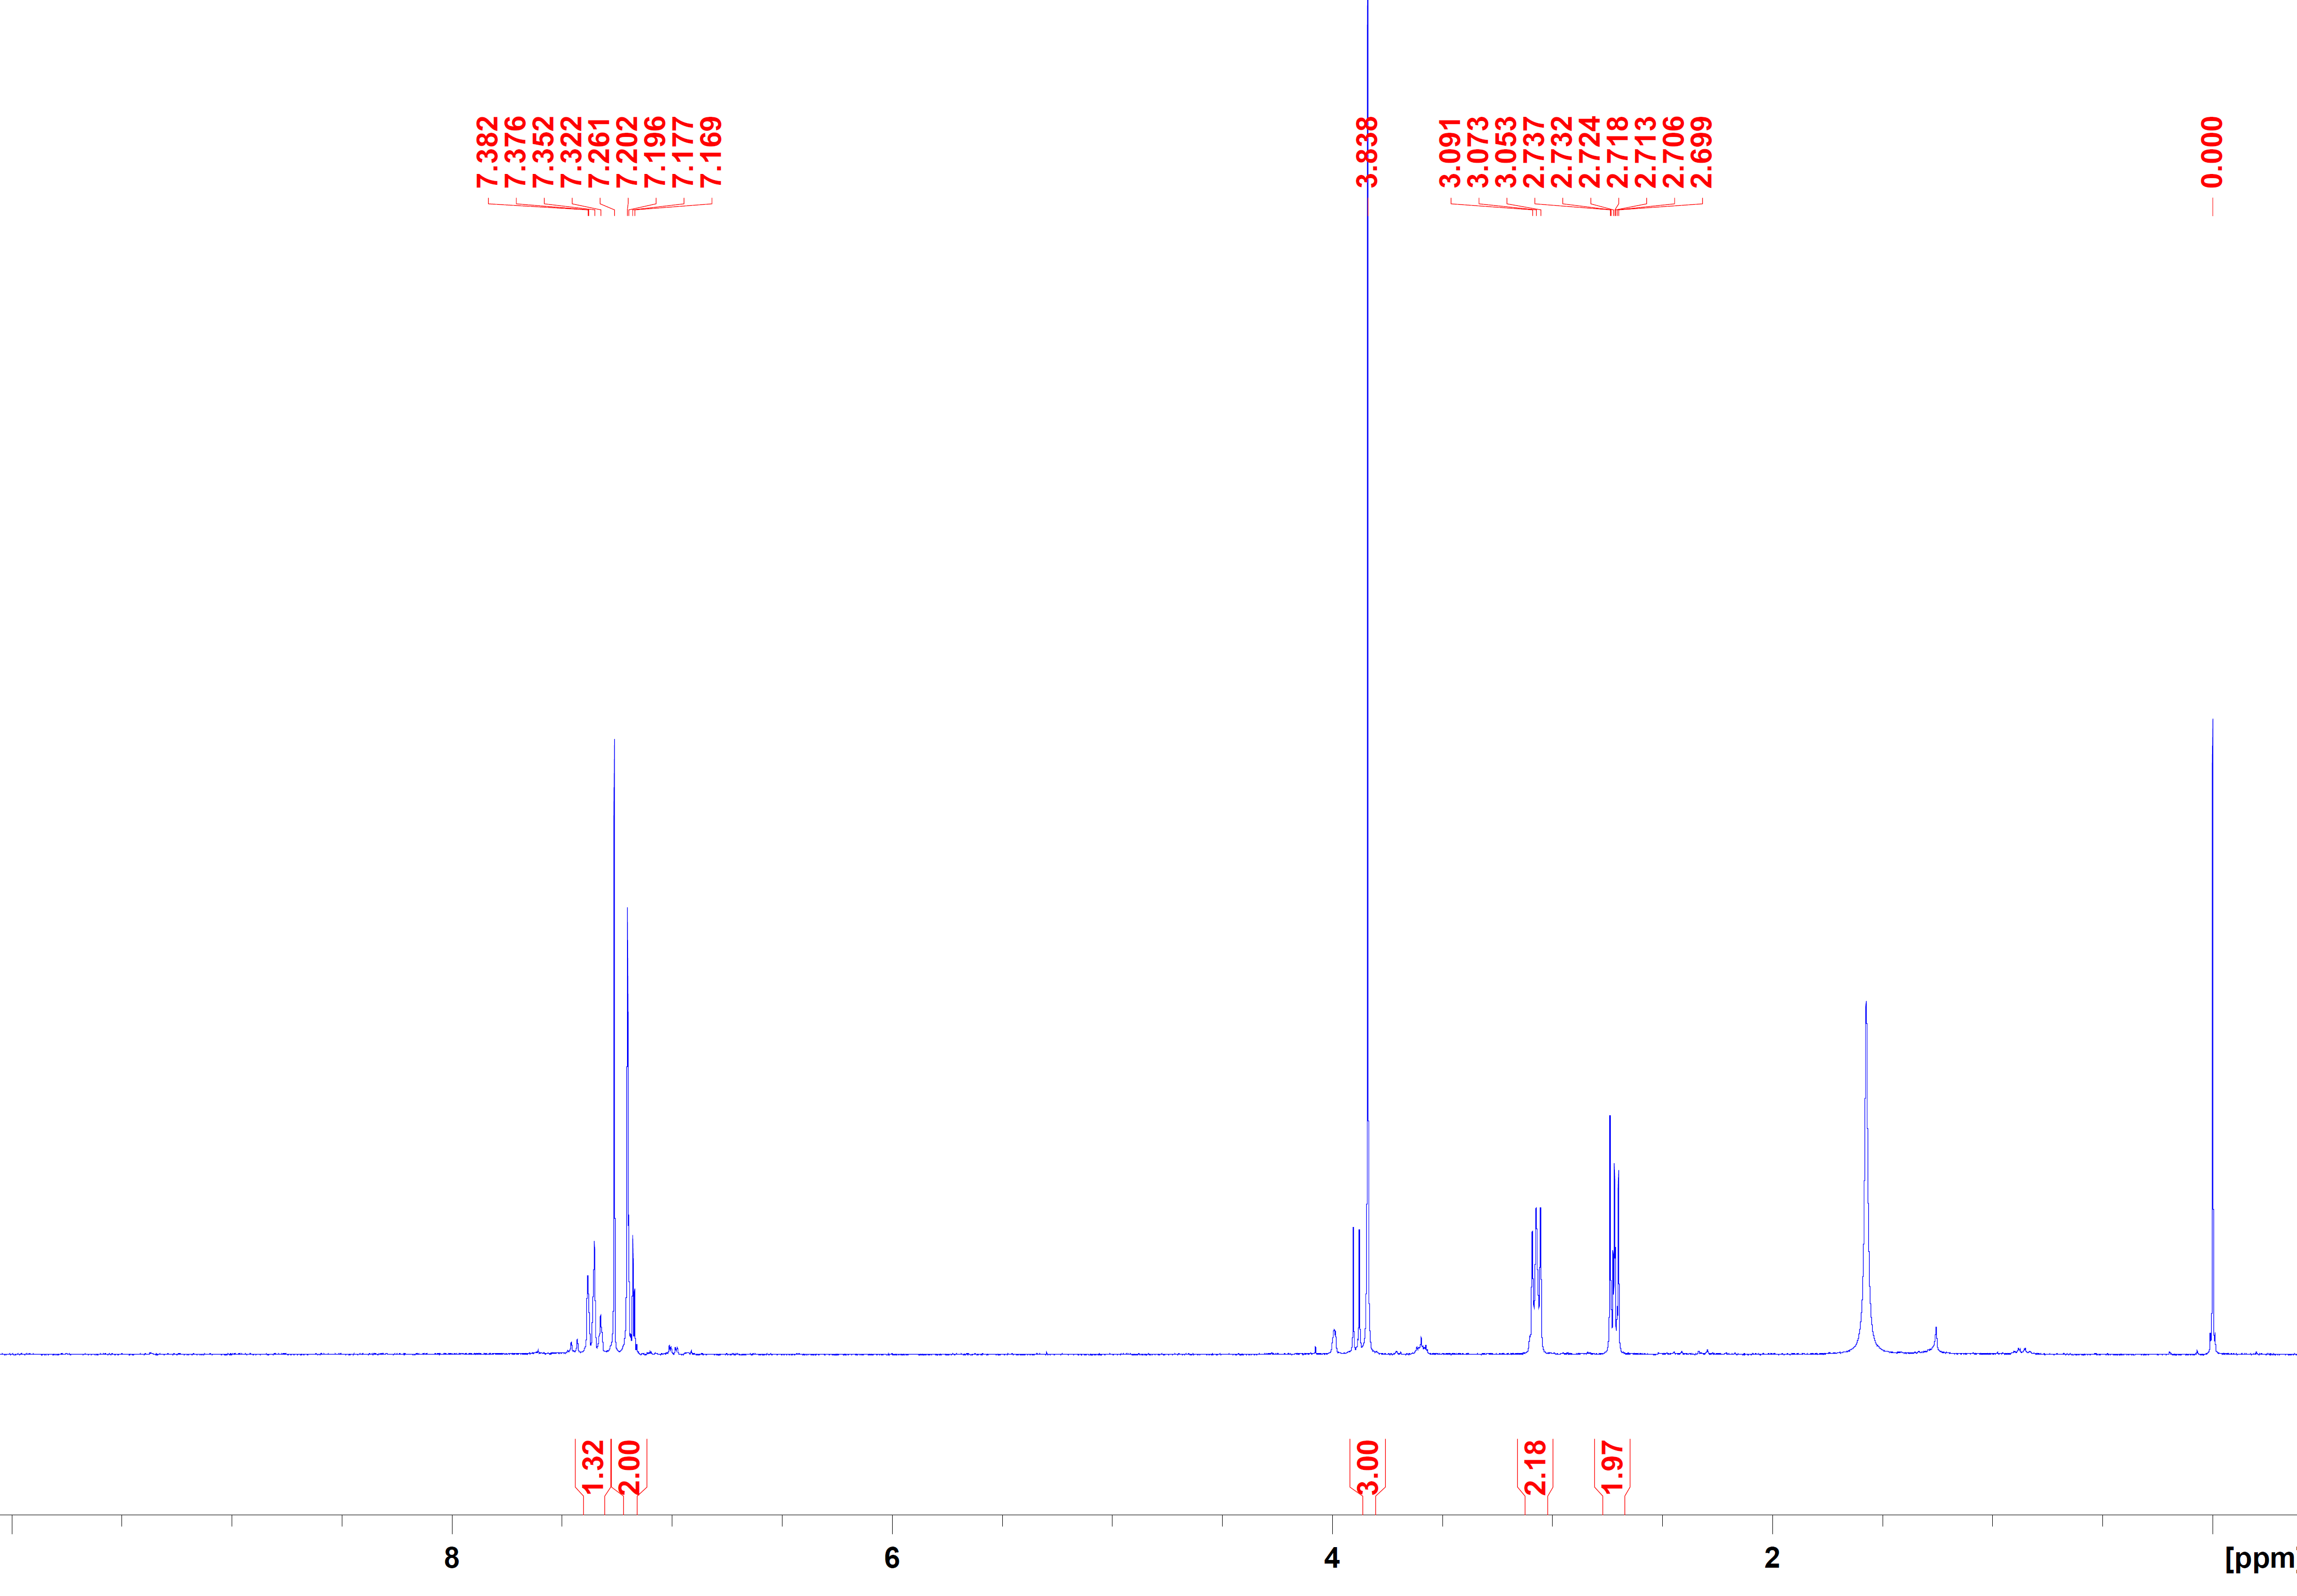


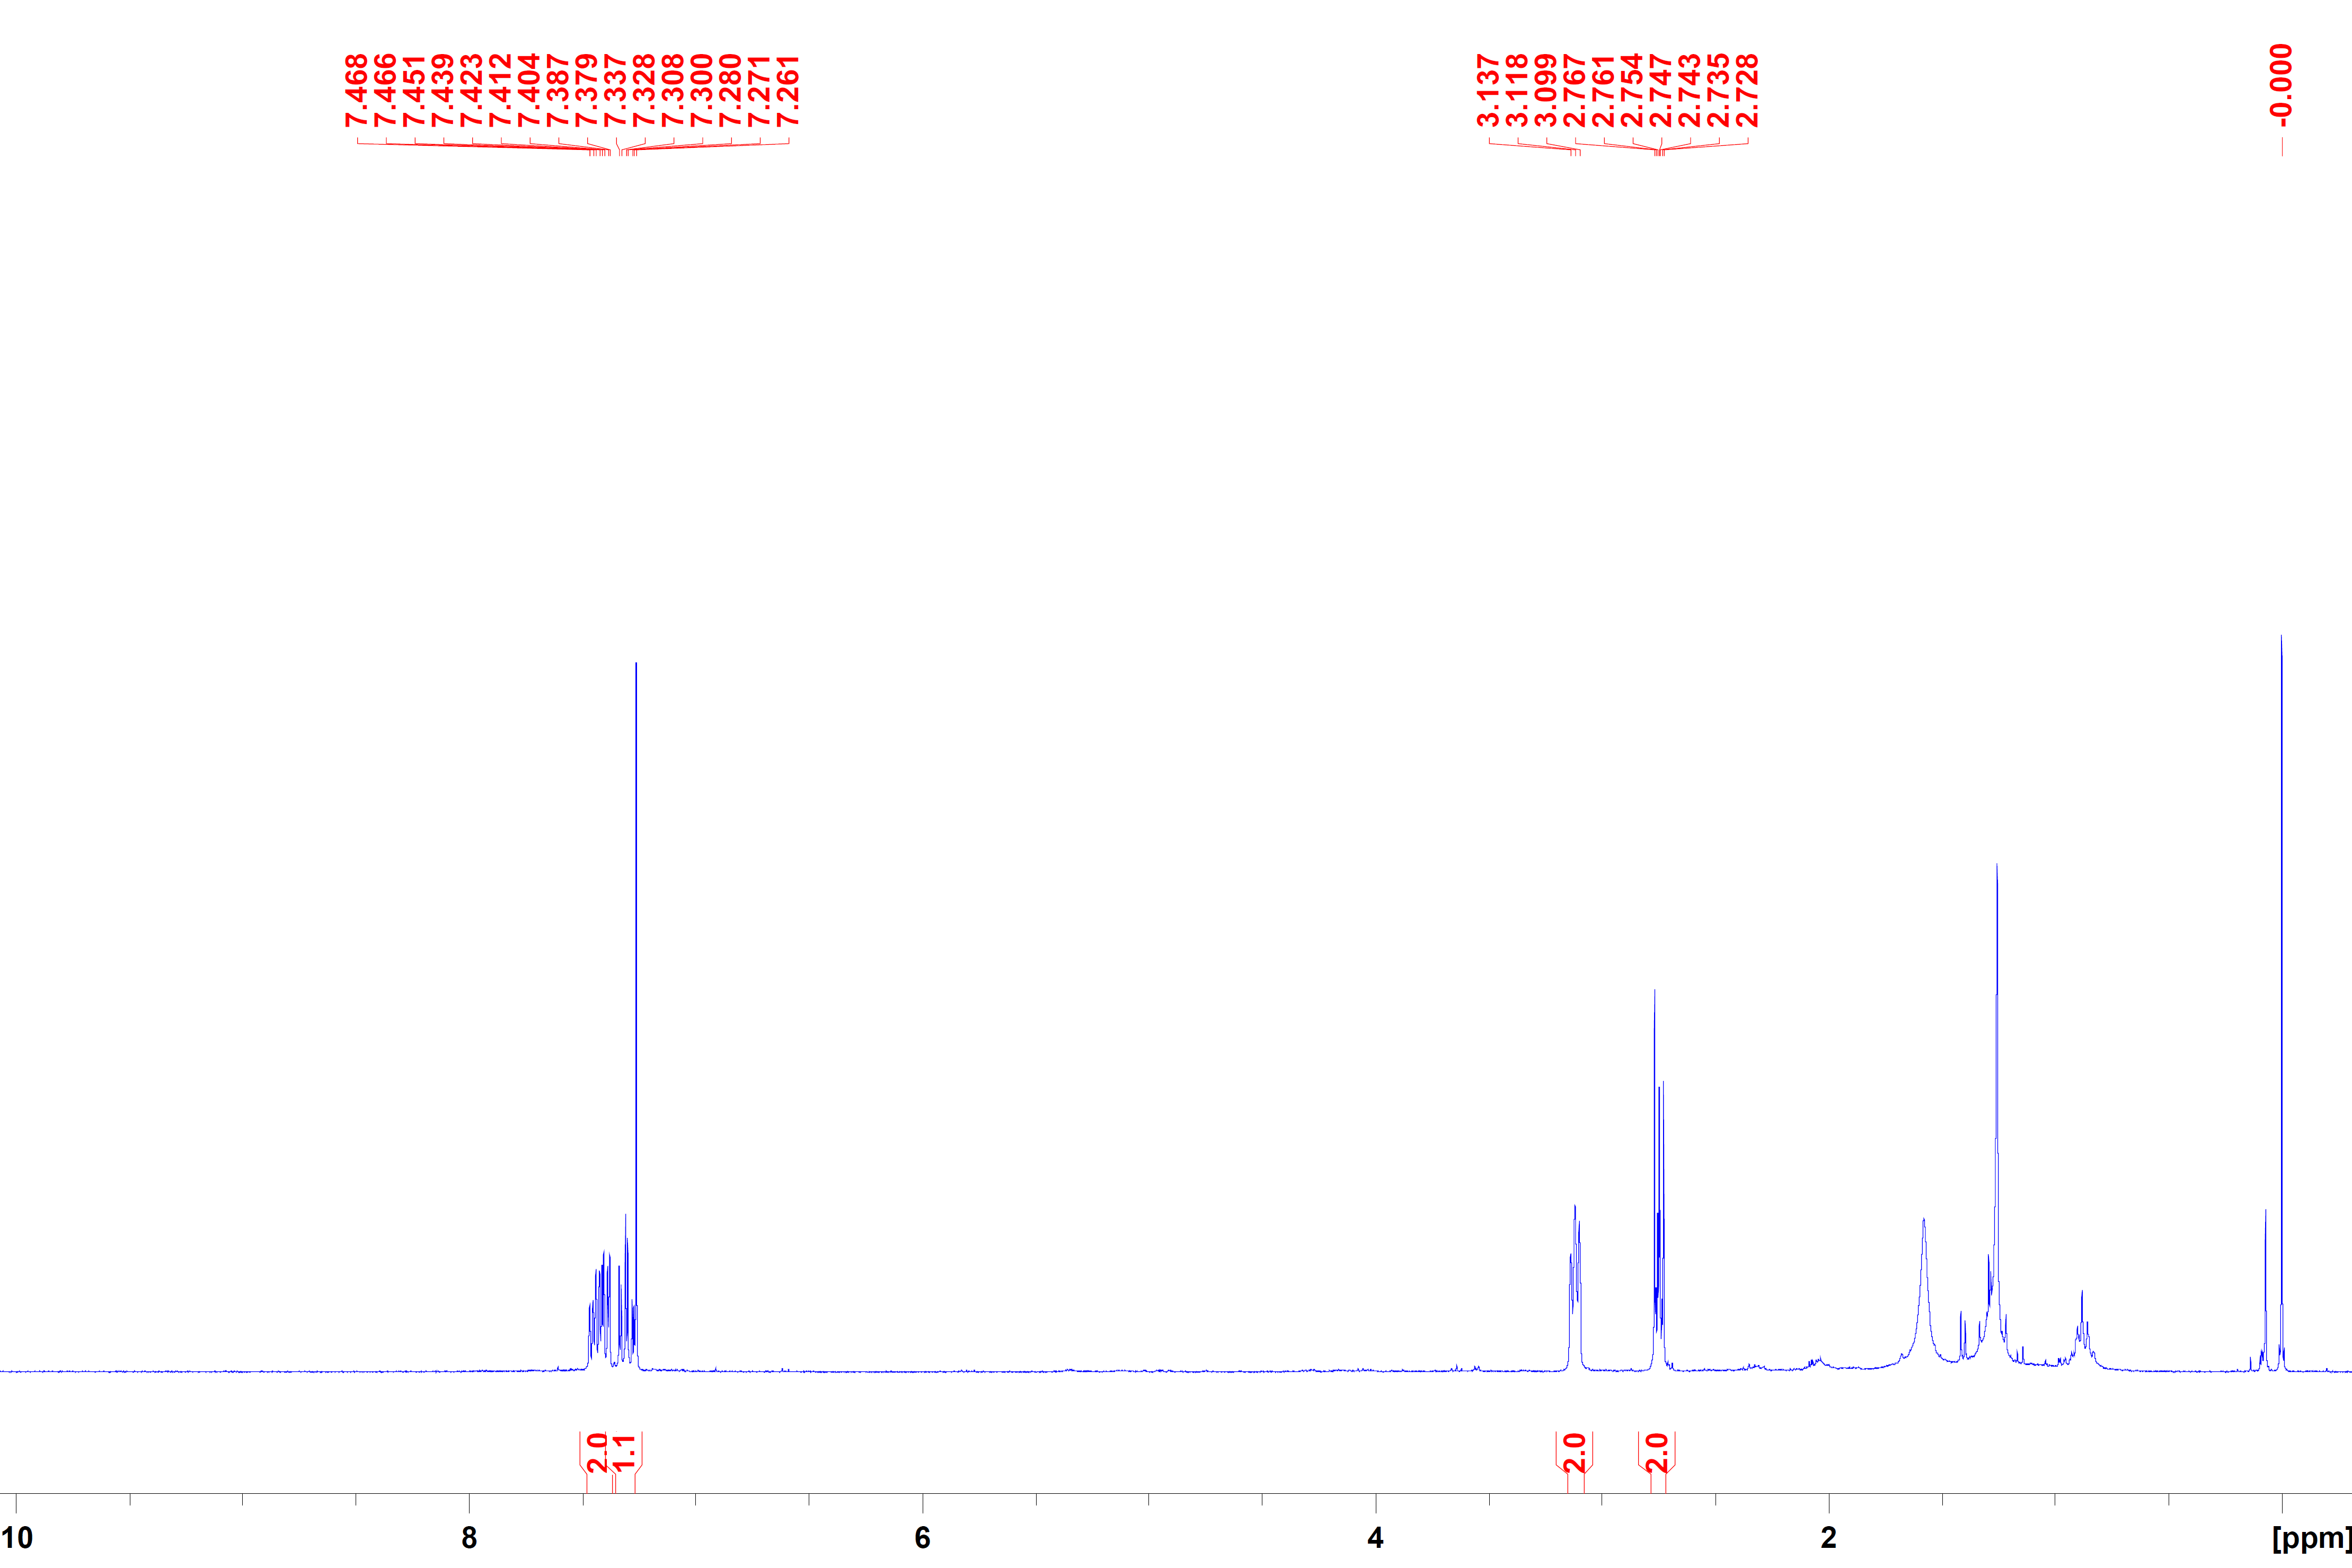

Supplement: Supplementary file 1 [file 23209289]
